# Supplementary material
Source: publisher figshare collection journal article supplement (https://geolsoc.figshare.com/ndownloader/files/13643711)
Supplement: Supplementary file 1 [file 13643711]

## Sheet: Table A.1 U-Pb ages
Supplementary Table A.1 Zircon U-Pb age data of analyzed samples from batholiths in Myanmar
Spot		Th/U	207Pb/206Pb	± 1s	206Pb/238U	± 1s	207Pb/235U	± 1s	error corr.	206Pb/238U age (Ma ± 1s)		207Pb/206Pb age (Ma ± 1s)		207Pb/235U age (Ma ± 1s)
Gongshan
YC-14		wt. mean = 72.4 ± 0.9 Ma (2s)
YC-14-01		0.555556	0.0466	0.00052	0.01187	0.00026	0.07623	0.00194	0.86069	76	2	29	26	75	2
YC-14-02		0.403226	0.04936	0.00054	0.01134	0.00025	0.07715	0.00195	0.872224	73	2	165	27	75	2
YC-14-03		0.490196	0.04726	0.00158	0.01158	0.00028	0.0755	0.00389	0.469296	74	2	63	73	74	4
YC-14-04		0.5	0.05648	0.00104	0.01123	0.00029	0.08739	0.00331	0.681792	72	2	471	42	85	3
YC-14-05		0.37037	0.04979	0.00054	0.01158	0.00025	0.07951	0.00196	0.875784	74	2	185	24	78	2
YC-14-06		0.331126	0.04778	0.00051	0.01128	0.00025	0.07429	0.00182	0.904669	72	2	88	28	73	2
YC-14-07		0.362319	0.04737	0.00051	0.01112	0.00024	0.07265	0.00179	0.87597	71	2	68	27	71	2
YC-14-08		0.253165	0.05016	0.00069	0.01109	0.00026	0.07669	0.00233	0.771658	71	2	202	33	75	2
YC-14-09		0.378788	0.05059	0.00095	0.01126	0.00028	0.07853	0.00297	0.657505	72	2	222	46	77	3
YC-14-10		0.75188	0.04878	0.00059	0.0114	0.00025	0.07665	0.00208	0.808135	73	2	137	27	75	2
YC-14-11		0.438596	0.04717	0.00048	0.01104	0.00024	0.0718	0.00166	0.940283	71	2	58	24	70	2
YC-14-12		0.465116	0.04815	0.00051	0.01113	0.00025	0.07386	0.00178	0.932039	71	2	107	25	72	2
YC-14-13		0.174216	0.04792	0.00048	0.01098	0.00024	0.07252	0.00166	0.954902	70	2	95	24	71	2
YC-14-14		0.952381	0.05686	0.00119	0.011	0.00028	0.08623	0.00351	0.625341	71	2	486	46	84	3
YC-14-15		0.248139	0.04986	0.00052	0.01121	0.00024	0.07704	0.00185	0.891559	72	2	188	23	75	2
YC-14-16		0.3125	0.04955	0.00051	0.01116	0.00024	0.0762	0.00179	0.91548	72	2	174	23	75	2
YC-14-17		0.934579	0.0495	0.00093	0.01168	0.00029	0.07969	0.00301	0.657344	75	2	172	44	78	3
YC-14-18		0.877193	0.04833	0.00063	0.01147	0.00026	0.07641	0.00221	0.783732	74	2	115	31	75	2
YC-14-19		1.1236	0.04741	0.00365	0.01113	0.00029	0.07277	0.00704	0.269329	71	2	70	161	71	7
YC-14-20		0.423729	0.04784	0.00051	0.01129	0.00025	0.07445	0.00183	0.900865	72	2	91	25	73	2
YC-15		wt. mean = 212.3 ± 1.9 Ma (2s)
YC-15-01		0.689655	0.05106	0.00056	0.03412	0.00072	0.24016	0.00597	0.848887	216	4	244	27	219	5
YC-15-02		0.298507	0.05218	0.00062	0.03372	0.00076	0.24254	0.00657	0.83204	214	5	293	27	220	5
YC-15-03		0.769231	0.0504	0.00051	0.03413	0.00074	0.23714	0.00552	0.931453	216	5	213	24	216	5
YC-15-04		0.0418585	0.05071	0.00052	0.03211	0.0007	0.22447	0.00532	0.919823	204	4	228	23	206	4
YC-15-05		0.0156764	0.05116	0.00053	0.03284	0.00073	0.23164	0.0055	0.936204	208	5	248	23	212	5
	c	0.294985	0.05045	0.0005	0.03406	0.00072	0.2369	0.00533	0.939563	216	4	216	24	216	4
YC-15-06		0.793651	0.05069	0.00051	0.03441	0.00074	0.24053	0.00557	0.928669	218	5	227	23	219	5
YC-15-07		0.561798	0.05123	0.00053	0.03337	0.00073	0.23569	0.0056	0.920703	212	5	251	24	215	5
YC-15-08		0.0316056	0.05009	0.00053	0.03406	0.00076	0.23526	0.00571	0.91935	216	5	199	25	215	5
	c	0.41841	0.05026	0.0005	0.03417	0.00073	0.23677	0.00543	0.931547	217	5	207	23	216	4
YC-15-09		0.0513347	0.05116	0.00053	0.03394	0.00073	0.23938	0.00564	0.912893	215	5	248	23	218	5
YC-15-10		0.315457	0.05084	0.00051	0.0338	0.00072	0.23696	0.00549	0.91943	214	4	234	22	216	5
YC-15-11		0.689655	0.05059	0.0005	0.03375	0.00072	0.23536	0.00536	0.936756	214	4	222	23	215	4
YC-15-12		0.558659	0.05052	0.00055	0.03311	0.00071	0.23064	0.00571	0.866159	210	4	219	24	211	5
YC-15-13		0.276243	0.05112	0.00061	0.03317	0.0007	0.2338	0.0062	0.795803	210	4	246	27	213	5
YC-15-14		0.202429	0.05038	0.0005	0.0331	0.0007	0.22994	0.00525	0.926244	210	4	213	25	210	4
YC-15-15		0.649351	0.05104	0.00053	0.0338	0.00073	0.23784	0.00562	0.914018	214	5	243	25	217	5
YC-15-16		0.540541	0.05088	0.00053	0.03352	0.00072	0.23508	0.0056	0.901688	213	4	235	25	214	5
YC-15-17		0.0488759	0.04989	0.00051	0.03324	0.00071	0.22867	0.00539	0.906187	211	4	190	22	209	4
YC-15-18		0.819672	0.05208	0.00051	0.03365	0.00072	0.24159	0.00544	0.950227	213	4	289	23	220	4
YC-15-19		1.05263	0.05143	0.00052	0.03305	0.0007	0.23436	0.00541	0.917514	210	4	260	23	214	4
YC-15-20		0.490196	0.0515	0.00057	0.03355	0.00072	0.2382	0.00603	0.847743	213	4	263	26	217	5
Lushui
YNW-29A		wt. mean = 117.2 ± 1.1 Ma (2s)
YNW-29A-01		1.31579	0.04884	0.00049	0.01801	0.00038	0.12125	0.00277	0.923574	115	2	140	22	116	3
YNW-29A-02		0.465116	0.05082	0.0007	0.01768	0.00042	0.12389	0.00379	0.77654	113	3	233	33	119	3
YNW-29A-03		0.909091	0.04842	0.00089	0.01872	0.00044	0.12498	0.00454	0.647041	120	3	120	43	120	4
YNW-29A-04		0.558659	0.05185	0.00053	0.01775	0.00037	0.12686	0.00297	0.890372	113	2	279	22	121	3
YNW-29A-05		1.13636	0.04858	0.00049	0.01808	0.00039	0.12107	0.00281	0.929387	116	2	128	24	116	3
YNW-29A-06		0.555556	0.04911	0.0005	0.01838	0.00039	0.12442	0.00289	0.913506	117	2	153	23	119	3
	c	0.819672	0.04872	0.00068	0.01863	0.00041	0.12516	0.00376	0.732569	119	3	134	35	120	3
YNW-29A-07		0.568182	0.04729	0.00054	0.01825	0.00041	0.11897	0.00309	0.864968	117	3	64	25	114	3
YNW-29A-08		0.518135	0.04939	0.00051	0.01843	0.0004	0.12546	0.00296	0.919916	118	3	166	24	120	3
YNW-29A-09		0.584795	0.04929	0.00053	0.01854	0.0004	0.12597	0.0031	0.876709	118	3	162	24	120	3
	c	1.02041	0.04909	0.00052	0.01818	0.00038	0.12302	0.00297	0.865783	116	2	152	26	118	3
YNW-29A-10		0.641026	0.04797	0.00061	0.01907	0.00042	0.12614	0.00356	0.780372	122	3	98	29	121	3
YNW-29A-11		0.526316	0.04887	0.00051	0.01838	0.00039	0.12384	0.00296	0.887745	117	2	142	25	119	3
YNW-29A-12		1.06383	0.04866	0.00071	0.01891	0.00043	0.12682	0.00394	0.731928	121	3	131	33	121	4
YNW-29A-13		0.598802	0.04879	0.00049	0.01839	0.0004	0.12374	0.00285	0.944373	117	3	138	22	118	3
YNW-29A-14		1.69492	0.04865	0.0005	0.01815	0.00038	0.12175	0.00287	0.888166	116	2	131	24	117	3
YNW-29A-15		1.03093	0.04925	0.0005	0.01911	0.00041	0.12974	0.003	0.927846	122	3	160	23	124	3
YNW-29A-16		0.735294	0.0488	0.00049	0.01886	0.00041	0.12692	0.00293	0.941683	120	3	138	24	121	3
	c	0.900901	0.04894	0.00051	0.01834	0.0004	0.12371	0.00297	0.908467	117	3	145	26	118	3
YNW-29A-17		0.584795	0.04873	0.00051	0.01827	0.0004	0.12274	0.00293	0.917149	117	3	135	23	118	3
YNW-29A-18		1.13636	0.04868	0.00098	0.01847	0.00044	0.12395	0.00479	0.616448	118	3	132	46	119	4
YNW-29A-19		0.483092	0.04927	0.00085	0.01927	0.00043	0.13088	0.0045	0.649004	123	3	161	40	125	4
YNW-29A-20		0.649351	0.04881	0.0005	0.01836	0.00039	0.12353	0.00289	0.90796	117	2	139	24	118	3
YNW-30A		wt. mean = 118.9 ± 1.3 Ma (2s)
YNW-30A-01		0.645161	0.04966	0.00057	0.01867	0.00042	0.12785	0.00335	0.858541	119	3	148	25	120	3
	c	0.892857	0.049	0.00053	0.01849	0.0004	0.12493	0.0031	0.871823	118	3	179	27	122	3
YNW-30A-02		0.617284	0.04638	0.00168	0.01823	0.00042	0.11661	0.00607	0.442598	116	3	18	80	112	6
YNW-30A-03		0.52356	0.05013	0.00056	0.0184	0.00041	0.12715	0.00325	0.871764	118	3	201	27	122	3
YNW-30A-04		1	0.04974	0.00057	0.0184	0.00041	0.12621	0.00331	0.849634	118	3	183	29	121	3
YNW-30A-05		0.75188	0.04875	0.00051	0.01832	0.0004	0.12316	0.00297	0.905415	117	3	136	26	118	3
YNW-30A-06		0.549451	0.05464	0.00064	0.0192	0.00041	0.14464	0.00382	0.808551	123	3	398	26	137	3
	c	0.045977	0.08693	0.00088	0.1377	0.00306	1.65033	0.03804	0.96409	832	17	1359	20	990	15
YNW-30A-07		0.416667	0.0516	0.00067	0.0188	0.0004	0.13377	0.00376	0.75696	120	3	268	30	127	3
YNW-30A-08		0.497512	0.04901	0.00063	0.01868	0.00043	0.12623	0.00361	0.804909	119	3	148	30	121	3
YNW-30A-09		0.662252	0.04926	0.00051	0.01874	0.00041	0.12726	0.00301	0.924996	120	3	160	24	122	3
YNW-30A-10		0.515464	0.04921	0.00052	0.01825	0.0004	0.12386	0.00302	0.89892	117	3	158	25	119	3
YNW-30A-11		0.480769	0.04838	0.0005	0.01844	0.0004	0.12304	0.00289	0.923523	118	3	118	25	118	3
YNW-30A-12		0.675676	0.0461	0.00172	0.01874	0.00041	0.11912	0.00613	0.425146	120	3	3	70	114	6
	c	0.943396	0.04862	0.00065	0.0186	0.00042	0.12472	0.00368	0.765288	119	3	130	31	119	3
YNW-30A-13		0.70922	0.04972	0.00056	0.01865	0.00042	0.12785	0.00331	0.869848	119	3	182	28	122	3
	c	0.348432	0.04934	0.00054	0.01843	0.0004	0.12539	0.00313	0.869467	118	3	164	23	120	3
YNW-30A-14		0.617284	0.04914	0.00057	0.01879	0.00042	0.12733	0.00334	0.852132	120	3	155	27	122	3
YNW-30A-15		0.438596	0.05102	0.00055	0.01896	0.00042	0.13336	0.00329	0.897926	121	3	242	23	127	3
	c	0.208768	0.074	0.00075	0.09612	0.00203	0.98076	0.02275	0.910466	592	12	1041	20	694	12
YNW-30A-16		0.961538	0.04608	0.00237	0.01871	0.00045	0.11887	0.00777	0.367951	119	3	2	114	114	7
YNW-30A-17		0.520833	0.05002	0.00065	0.01803	0.00043	0.12435	0.00363	0.816981	115	3	196	30	119	3
YNW-30A-18		0.943396	0.04986	0.00076	0.01892	0.00044	0.13007	0.00422	0.716797	121	3	188	38	124	4
YNW-30A-19		0.588235	0.04875	0.00051	0.01881	0.00041	0.12642	0.00302	0.912439	120	3	136	24	121	3
YNW-30A-20		1.26582	0.04854	0.00049	0.01855	0.00041	0.12411	0.00286	0.959137	118	3	126	21	119	3
Longling
YN98-49A		wt. mean = 454.2 ± 4.6 Ma (2s)
YN98-49A-01		0.526316	0.06419	0.00085	0.07146	0.00155	0.63247	0.01825	0.751702	445	9	748	28	498	11
YN98-49A-02		0.197239	0.05663	0.00053	0.07499	0.00156	0.58547	0.0125	0.974352	466	9	477	20	468	8
YN98-49A-03		0.098912	0.05771	0.00065	0.07598	0.00175	0.60456	0.01552	0.897194	472	10	519	24	480	10
YN98-49A-04		0.293255	0.05646	0.00053	0.07261	0.0015	0.56516	0.01202	0.971319	452	9	471	21	455	8
YN98-49A-05		0.552486	0.05677	0.00057	0.07518	0.00158	0.58839	0.01361	0.908577	467	9	483	22	470	9
YN98-49A-06		0.0923361	0.05582	0.00053	0.07486	0.00155	0.57614	0.01233	0.967491	465	9	445	21	462	8
YN98-49A-07		0.251256	0.0559	0.00053	0.07433	0.00155	0.57286	0.01243	0.961048	462	9	448	22	460	8
YN98-49A-08		0.0670241	0.0562	0.00053	0.07412	0.00154	0.57428	0.01232	0.968497	461	9	460	22	461	8
YN98-49A-09		0.121065	0.05597	0.00053	0.07053	0.00147	0.54428	0.01178	0.962987	439	9	451	22	441	8
YN98-49A-10		0.242131	0.05595	0.00054	0.07324	0.00153	0.56498	0.01229	0.960338	456	9	450	22	455	8
YN98-49A-11		0.0904159	0.05604	0.00054	0.07453	0.00156	0.57578	0.01257	0.958771	463	9	454	20	462	8
	c	0.148368	0.14803	0.00143	0.34525	0.0069	7.04735	0.15628	0.901235	1912	33	2323	17	2117	20
YN98-49A-12		0.120192	0.05634	0.00054	0.07146	0.00149	0.55508	0.01219	0.949457	445	9	466	21	448	8
	c	0.0987167	0.06641	0.00085	0.12003	0.00266	1.09902	0.03207	0.759449	731	15	819	27	753	16
YN98-49A-13		0.0681199	0.05595	0.00054	0.07205	0.00151	0.55581	0.01209	0.963481	448	9	450	21	449	8
YN98-49A-14		0.350877	0.05672	0.00054	0.072	0.00151	0.56312	0.01227	0.9625	448	9	481	20	454	8
YN98-49A-15		0.18622	0.05591	0.00054	0.07085	0.00147	0.54618	0.01196	0.947506	441	9	449	23	442	8
YN98-49A-16		0.387597	0.05623	0.00054	0.07264	0.00152	0.5631	0.0124	0.950236	452	9	461	22	454	8
YN98-49A-17		0.0803213	0.05609	0.00054	0.07463	0.00157	0.57712	0.01267	0.958243	464	9	456	21	463	8
YN98-49A-18		0.358423	0.05629	0.00058	0.07463	0.00164	0.57923	0.01374	0.926392	464	10	464	21	464	9
YN98-49A-19		0.0713776	0.05667	0.00054	0.07175	0.00151	0.56061	0.01218	0.968654	447	9	479	23	452	8
YN98-49A-20		0.431034	0.056	0.00055	0.07198	0.0015	0.55569	0.01258	0.920516	448	9	452	22	449	8
YN98-49A-21		0.568182	0.05623	0.00054	0.06878	0.00145	0.53319	0.01168	0.962376	429	9	461	22	434	8
YN98-49A-22		0.847458	0.05632	0.00055	0.07332	0.00155	0.5693	0.01269	0.948394	456	9	465	22	458	8
YN98-49A-23		0.273224	0.06582	0.00064	0.12734	0.00268	1.15548	0.02571	0.945868	773	15	801	21	780	12
	c	0.0607903	0.1507	0.00143	0.38767	0.00761	8.0551	0.18104	0.873411	2112	35	2354	17	2237	20
YN98-49A-24		0.0681663	0.05602	0.00054	0.07409	0.00156	0.57223	0.01268	0.950203	461	9	453	22	459	8
	c	0.0959693	0.15059	0.00151	0.32988	0.00752	6.84956	0.1734	0.900483	1838	36	2353	17	2092	22
Htawgaw
BW5		wt. mean = 49.1 ± 0.5 Ma (2s)
BW5-01		1.21951	0.0548	0.00077	0.00798	0.00016	0.06031	0.00175	0.690985	51	1	404	28	59	2
BW5-02		0.952381	0.05113	0.00141	0.00778	0.00017	0.05485	0.0025	0.479409	50	1	247	57	54	2
BW5-03		0.813008	0.04933	0.00119	0.00797	0.00017	0.05419	0.00225	0.513721	51	1	164	51	54	2
	c	0.465116	0.05882	0.00054	0.05399	0.001	0.43788	0.0092	0.881564	339	6	560	18	369	6
BW5-04		0.813008	0.0442	0.00097	0.00796	0.00016	0.04849	0.00185	0.52685	51	1	-60	39	48	2
	c	0.833333	0.05033	0.00056	0.00782	0.00015	0.05427	0.00133	0.782695	50.2	1	210	23	54	1
BW5-05		0.740741	0.04715	0.00162	0.00774	0.00017	0.05034	0.00266	0.415661	50	1	57	69	50	3
BW5-06		1.03093	0.05031	0.00103	0.00785	0.00016	0.05443	0.002	0.554701	50	1	209	43	54	2
BW5-07		1.04167	0.04981	0.00103	0.00772	0.00016	0.05301	0.00198	0.554875	50	1	186	44	52	2
BW5-08		1.35135	0.04702	0.00083	0.00761	0.00016	0.04931	0.00168	0.617108	49	1	50	37	49	2
BW5-09		0.943396	0.04807	0.00169	0.00765	0.00017	0.05072	0.00273	0.412861	49	1	103	73	50	3
BW5-10		0.826446	0.04645	0.00088	0.00763	0.00016	0.04883	0.00173	0.591883	49	1	21	38	48	2
BW5-11		0.632911	0.04888	0.00102	0.00752	0.00015	0.0507	0.00187	0.540804	48.3	1	142	48	50	2
BW5-12		0.75188	0.05166	0.00404	0.00737	0.00017	0.05252	0.00512	0.236612	47	1	270	171	52	5
BW5-13		0.675676	0.04877	0.00072	0.0073	0.00015	0.04906	0.00148	0.681137	46.9	1	137	34	49	1
BW5-14		1.07527	0.05029	0.0019	0.00769	0.00017	0.05333	0.00301	0.391677	49	1	208	86	53	3
BW5-15		1.13636	0.05461	0.00108	0.00765	0.00016	0.05758	0.00209	0.576214	49	1	396	43	57	2
BW5-16		0.228833	0.05113	0.0005	0.00761	0.00015	0.05361	0.00121	0.873307	48.9	1	247	22	53	1
BW5-18		1.11111	0.04902	0.00048	0.00754	0.00015	0.05094	0.00115	0.881213	48.4	1	149	23	50	1
BW5-19		0.75188	0.0509	0.00332	0.00752	0.00016	0.05277	0.00434	0.258702	48	1	236	143	52	4
BW5-20		1.16279	0.03925	0.00147	0.0075	0.00016	0.04059	0.00225	0.384853	48	1	-334	100	40	2
BW5-21		0.917431	0.044	0.00212	0.00755	0.00017	0.04577	0.00309	0.333522	48	1	-71	99	45	3
BW5-22		0.847458	0.05442	0.0011	0.00764	0.00016	0.05733	0.00211	0.569018	49	1	388	44	57	2
BW9		wt. mean = 51.5 ± 0.9 Ma (2s)
BW9-01		0.884956	0.04814	0.00075	0.00794	0.00016	0.05273	0.00163	0.651883	51	1	106	40	52	2
BW9-02		0.357143	0.04812	0.00283	0.00848	0.00019	0.05628	0.00423	0.298107	54	1	105	116	56	4
	c	0.632911	0.04854	0.00043	0.01095	0.00021	0.07331	0.00149	0.943587	70	1	126	23	72	1
BW9-03		0.452489	0.04799	0.00043	0.00846	0.00016	0.056	0.00116	0.913019	54	1	99	19	55	1
BW9-04		0.47619	0.04766	0.00069	0.00827	0.00017	0.05435	0.00162	0.689649	53	1	82	31	54	2
	c	0.578035	0.04696	0.00042	0.01111	0.00021	0.07194	0.00148	0.918785	71	1	47	20	71	1
BW9-05		1.14943	0.05567	0.0008	0.0081	0.00017	0.06219	0.00187	0.69798	52	1	439	29	61	2
BW9-06		0.355872	0.04655	0.00131	0.00815	0.00016	0.05234	0.00215	0.477923	52.4	1	26	52	52	2
BW9-07		0.662252	0.04917	0.00044	0.00998	0.00019	0.06763	0.0014	0.919675	64	1	156	19	66	1
BW9-08		1.49254	0.0472	0.0013	0.00775	0.00019	0.05044	0.00239	0.517403	50	1	59	55	50	2
BW9-09		0.344828	0.04739	0.00045	0.00773	0.00015	0.0505	0.00111	0.882836	49.6	1	69	21	50	1
BW9-10		0.552486	0.05134	0.0041	0.00801	0.00018	0.05674	0.00547	0.2331	51	1	256	164	56	5
BW9-11		0.47619	0.04616	0.00163	0.00816	0.00016	0.05192	0.00246	0.413837	52.4	1	6	63	51	2
BW9-12		0.30303	0.05022	0.00053	0.00838	0.00017	0.05799	0.00139	0.846337	54	1	205	22	57	1
BW9-13		0.729927	0.04803	0.00082	0.00794	0.00017	0.05257	0.00176	0.639519	51	1	101	37	52	2
BW9-14		0.458716	0.0485	0.00049	0.00785	0.00016	0.05247	0.00122	0.8766	50	1	124	22	52	1
BW9-15		0.490196	0.04741	0.00045	0.00747	0.00015	0.04883	0.00107	0.916376	48	1	70	21	48	1
BW9-16		0.15674	0.04883	0.00048	0.0075	0.00015	0.05051	0.00113	0.893982	48.2	1	140	21	50	1
BW9-17		0.675676	0.04875	0.00065	0.05457	0.00153	0.00812	0.00016	1.4229	52	1	136	29	54	1
	c	0.666667	0.04927	0.00048	0.01122	0.00022	0.07624	0.00169	0.884557	72	1	161	21	75	2
BW9-18		0.632911	0.04784	0.00086	0.0543	0.00186	0.00823	0.00017	1.6583	53	1	91	38	54	2
BW9-19		0.485437	0.0485	0.00055	0.05455	0.00137	0.00816	0.00016	1.28084	52	1	124	24	54	1
Sodon
M2		wt. mean = 53.8 ± 0.6 Ma (2s)
M2-01		0.252525	0.0476	0.00069	0.00852	0.00017	0.05593	0.00166	0.672274	55	1	79	33	55	2
M2-02		0.269542	0.04825	0.00065	0.00852	0.00017	0.05667	0.0016	0.706712	55	1	112	30	56	2
M2-03		0.414938	0.04969	0.0006	0.00856	0.00016	0.05865	0.00151	0.726001	55	1	181	27	58	1
	c	0.46729	0.04679	0.00125	0.00865	0.00018	0.05577	0.00244	0.475628	56	1	39	54	55	2
M2-04		0.200803	0.0468	0.00064	0.00862	0.00017	0.05565	0.00158	0.694624	55	1	39	30	55	2
M2-05		0.214133	0.0468	0.00043	0.00822	0.00016	0.05301	0.00111	0.929572	53	1	39	21	52	1
M2-06		0.239234	0.04779	0.00049	0.00858	0.00017	0.05655	0.00133	0.842447	55	1	89	23	56	1
	c	0.409836	0.05122	0.00204	0.00878	0.00018	0.06202	0.00343	0.370694	56	1	251	87	61	3
M2-08		0.319489	0.04662	0.00079	0.00849	0.00017	0.05457	0.00177	0.617336	54	1	30	35	54	2
M2-09		0.460829	0.04823	0.00068	0.00859	0.00017	0.05712	0.00165	0.68511	55	1	111	31	56	2
M2-10		0.162866	0.04745	0.00046	0.00803	0.00016	0.05253	0.00116	0.902306	52	1	72	22	52	1
M2-11		0.235849	0.04769	0.00045	0.00837	0.00016	0.05503	0.00119	0.883989	54	1	84	21	54	1
M2-12		0.284091	0.04699	0.00071	0.00822	0.00017	0.05322	0.00164	0.671132	53	1	49	34	53	2
	c	0.165563	0.0459	0.00049	0.00821	0.00016	0.05199	0.00125	0.810563	53	1	-7	19	51	1
M2-13		0.155763	0.04735	0.00043	0.00839	0.00016	0.05479	0.00115	0.908576	54	1	67	21	54	1
M2-14		0.181159	0.04647	0.00054	0.00825	0.00016	0.05286	0.00134	0.765047	53	1	22	26	52	1
M2-15		0.52356	0.04757	0.00078	0.00839	0.00017	0.05502	0.00176	0.633425	54	1	78	37	54	2
M2-16		0.213675	0.04723	0.00098	0.00839	0.00017	0.05464	0.00199	0.556345	54	1	61	45	54	2
M2-17		0.735294	0.04723	0.00086	0.00802	0.00017	0.05222	0.00182	0.608191	51	1	61	41	52	2
M2-18		0.353357	0.04957	0.00206	0.0081	0.00017	0.05537	0.0032	0.363152	52	1	175	91	55	3
	c	1.5625	0.05065	0.00222	0.0082	0.0002	0.05724	0.00369	0.378346	53	1	225	97	57	4
M2-19		0.442478	0.04728	0.00082	0.00822	0.00017	0.05356	0.00179	0.61882	53	1	63	39	53	2
M2-20		0.425532	0.04801	0.00141	0.00808	0.00019	0.05348	0.0026	0.483682	52	1	100	64	53	3
M7		wt. mean = 50.7 ± 0.6 Ma (2s)
M7-01		0.529101	0.04855	0.0009	0.00837	0.00017	0.056	0.00194	0.586286	54	1	126	40	55	2
M7-02		0.41841	0.04825	0.00107	0.00814	0.00017	0.05415	0.00211	0.53597	52	1	112	47	54	2
M7-03		0.518135	0.04741	0.00206	0.00818	0.00015	0.05346	0.00304	0.322473	52.5	0.9	70	85	53	3
M7-04		0.321543	0.04799	0.00062	0.00792	0.00016	0.05242	0.00145	0.730338	51	1	99	28	52	1
M7-05		0.458716	0.04829	0.00052	0.00789	0.00016	0.05251	0.00129	0.825459	51	1	114	23	52	1
M7-06		0.395257	0.04762	0.00053	0.00796	0.00016	0.05225	0.00131	0.801719	51	1	80	24	52	1
M7-07		0.628931	0.04837	0.0005	0.00788	0.00015	0.05255	0.00123	0.813266	50.6	1	117	22	52	1
M7-08		0.591716	0.04897	0.00065	0.00798	0.00016	0.05389	0.00151	0.715564	51	1	146	28	53	1
M7-09		0.189036	0.05181	0.00072	0.00798	0.00016	0.05696	0.00164	0.696375	51	1	277	29	56	2
M7-10		0.657895	0.04962	0.00052	0.00739	0.00015	0.05053	0.00121	0.847639	47.5	1	177	22	50	1
M7-11		0.952381	0.04841	0.00068	0.00787	0.00016	0.0525	0.00153	0.697611	51	1	119	30	52	1
M7-12		0.421941	0.05059	0.00058	0.00789	0.00016	0.05504	0.00141	0.791594	51	1	222	24	54	1
M7-13		1.2987	0.04922	0.00396	0.00756	0.00016	0.05133	0.00497	0.218581	49	1	158	160	51	5
M7-14		0.653595	0.04782	0.00047	0.0076	0.00015	0.05013	0.00112	0.8834	48.8	1	90	21	50	1
M7-15		0.37594	0.04783	0.00049	0.00773	0.00015	0.05096	0.00119	0.830987	49.6	1	91	22	50	1
M7-16		0.8	0.0515	0.00068	0.00765	0.00015	0.05428	0.00151	0.704844	49.1	1	263	28	54	1
M7-17		0.537634	0.04524	0.00072	0.00781	0.00016	0.04873	0.00154	0.648253	50	1	-7	25	48	1
M7-18		0.534759	0.05032	0.00071	0.00779	0.00017	0.054	0.00163	0.722966	50	1	210	30	53	2
M7-19		0.5	0.04823	0.00073	0.00787	0.00016	0.05234	0.0016	0.665057	51	1	111	32	52	2
M7-20		0.571429	0.04891	0.00071	0.00795	0.00017	0.05363	0.00163	0.703561	51	1	144	31	53	2
M7-21		0.497512	0.04729	0.00218	0.00818	0.00015	0.05335	0.00312	0.313558	52.5	0.9	64	90	53	3
M7-22		0.581395	0.04655	0.00068	0.00795	0.00016	0.05101	0.00152	0.675405	51	1	26	30	51	1
M7-23		0.609756	0.04824	0.00056	0.00794	0.00016	0.05278	0.00136	0.782042	51	1	111	25	52	1
M7-24		0.485437	0.04827	0.00054	0.00765	0.00015	0.05093	0.00127	0.786321	49.1	1	113	24	50	1
M8		wt. mean = 50.7 ± 1.5 Ma (2s)
M8-01		0.628931	0.04776	0.00044	0.00793	0.00015	0.05221	0.00111	0.889711	50.9	1	87	20	52	1
M8-02		0.221729	0.04719	0.00092	0.00801	0.00017	0.05215	0.00182	0.608134	51	1	59	41	52	2
M8-03		0.125628	0.04638	0.00059	0.00802	0.00016	0.05128	0.00142	0.720452	51	1	17	26	51	1
M8-04		0.442478	0.04865	0.00046	0.00833	0.00016	0.05585	0.00122	0.879303	53	1	131	21	55	1
M8-05		0.47619	0.04716	0.00045	0.00805	0.00016	0.05236	0.00115	0.904953	52	1	57	21	52	1
M8-06		0.606061	0.04727	0.00045	0.00855	0.00017	0.0557	0.00122	0.907775	55	1	63	21	55	1
M8-08		0.505051	0.04857	0.00056	0.00749	0.00016	0.05017	0.0013	0.824402	48	1	127	25	50	1
M8-09		1.66667	0.04966	0.00063	0.00697	0.00015	0.04772	0.00133	0.77216	44.8	1	179	27	47	1
M8-10		0.625	0.04716	0.00054	0.00947	0.00019	0.06158	0.00157	0.786944	61	1	57	25	61	2
M8-11		0.609756	0.04696	0.00051	0.00869	0.00018	0.05629	0.00138	0.844899	56	1	47	24	56	1
M8-12		0.787402	0.05061	0.00067	0.00967	0.0002	0.06748	0.00191	0.73071	62	1	223	28	66	2
M8-13		0.350877	0.05021	0.00051	0.00792	0.00016	0.05482	0.00128	0.865215	51	1	205	22	54	1
M8-14		0.346021	0.04708	0.00043	0.00861	0.00017	0.05588	0.00117	0.94301	55	1	53	20	55	1
M8-15		0.591716	0.04963	0.00072	0.00991	0.0002	0.06779	0.00201	0.680653	64	1	178	31	67	2
M8-16		0.704225	0.04713	0.00044	0.00927	0.00018	0.06022	0.00128	0.913532	59	1	56	20	59	1
	c	0.621118	0.04968	0.00052	0.00968	0.00019	0.0663	0.00158	0.823635	62	1	180	23	65	2
M8-17		0.497512	0.04793	0.00048	0.00817	0.00016	0.054	0.00123	0.859778	52	1	96	22	53	1
M8-18		0.331126	0.04706	0.00047	0.0085	0.00017	0.05517	0.00127	0.868819	55	1	52	22	55	1
M8-19		0.657895	0.04677	0.00073	0.0089	0.00019	0.05743	0.00182	0.673645	57	1	37	33	57	2
M8-20		0.840336	0.04639	0.00062	0.00946	0.0002	0.06053	0.00173	0.739713	61	1	18	27	60	2
M8-21		0.520833	0.04815	0.00047	0.00869	0.00017	0.0577	0.00129	0.875014	56	1	107	21	57	1
M8-22		0.200803	0.04722	0.00117	0.00734	0.00017	0.04782	0.00193	0.573859	47	1	61	51	47	2
Banmauk
BUR01		wt. mean = 70.7 ± 0.9 Ma (2s)
BUR01-01		0.60241	0.04967	0.00144	0.01592	0.00038	0.10899	0.0053	0.490853	102	2	180	61	105	5
BUR01-02		0.662252	0.04815	0.00114	0.01566	0.00036	0.10398	0.00439	0.544498	100	2	107	50	100	4
BUR01-03		0.609756	0.04961	0.00144	0.01709	0.00041	0.1169	0.0057	0.492019	109	3	177	61	112	5
BUR01-04		0.46729	0.04762	0.00084	0.01653	0.00037	0.10855	0.00377	0.644492	106	2	80	37	105	3
BUR01-05		0.75188	0.04566	0.00104	0.01599	0.00037	0.10064	0.00414	0.562501	102	2	-20	38	97	4
BUR01-06		0.502513	0.04929	0.00166	0.01658	0.0004	0.11268	0.00605	0.449332	106	3	162	70	108	6
BUR01-07		0.49505	0.04775	0.001	0.01586	0.00036	0.10437	0.00406	0.583511	101	2	87	44	101	4
BUR01-08		0.452489	0.04543	0.0009	0.0159	0.00036	0.0996	0.00373	0.604583	102	2	-32	34	96	3
BUR01-09		0.621118	0.04513	0.00147	0.01623	0.00038	0.10097	0.00526	0.44944	104	2	-13	57	98	5
BUR01-10		0.574713	0.08446	0.00197	0.01734	0.00041	0.20192	0.00852	0.56037	111	3	1303	41	187	7
BUR01-11		0.606061	0.04804	0.00124	0.01616	0.00037	0.107	0.00476	0.51468	103	2	101	55	103	4
BUR01-12		0.549451	0.04476	0.00145	0.01598	0.00037	0.09859	0.0051	0.447597	102	2	-32	57	95	5
BUR01-13		0.37594	0.04781	0.00071	0.01573	0.00035	0.10365	0.00324	0.711809	101	2	90	31	100	3
BUR01-14		0.578035	0.0486	0.00136	0.01597	0.00037	0.10698	0.00502	0.493737	102	2	129	59	103	5
	c	0.429185	0.05083	0.00152	0.01589	0.00037	0.11138	0.00546	0.474999	102	2	233	62	107	5
BUR01-15		0.393701	0.04949	0.00078	0.01571	0.00035	0.10717	0.00349	0.684132	100	2	171	33	103	3
BUR01-17		0.295858	0.04814	0.00051	0.01588	0.00034	0.10537	0.00258	0.874431	102	2	106	22	102	2
BUR01-18		0.471698	0.05101	0.00095	0.01658	0.00037	0.11663	0.00419	0.621174	106	2	241	37	112	4
BUR01-19		0.546448	0.05055	0.00133	0.01619	0.00038	0.11282	0.00513	0.516185	104	2	220	53	109	5
BUR01-20		0.613497	0.04607	0.00174	0.01629	0.00035	0.10345	0.00532	0.417797	104	2	1	62	100	5
BUR04		wt. mean = 101.5 ± 1.0 Ma (2s)
BUR04-02		1.75439	0.04688	0.00051	0.01594	0.00035	0.10301	0.00257	0.880088	102	2	43	26	100	2
BUR04-03		1.02041	0.04681	0.00087	0.0156	0.00035	0.10069	0.00363	0.622333	100	2	40	43	97	3
BUR04-04		1.21951	0.04891	0.00053	0.0156	0.00035	0.10521	0.00262	0.900947	100	2	144	27	102	2
BUR04-05		1.08696	0.05059	0.00065	0.0164	0.00035	0.1144	0.0032	0.762957	105	2	222	31	110	3
BUR04-06		0.355872	0.05645	0.00057	0.06657	0.00146	0.51804	0.01179	0.96366	415	9	470	23	424	8
BUR04-07		1.1236	0.04846	0.00408	0.0159	0.00041	0.10623	0.01087	0.252002	102	3	122	182	103	10
BUR04-08		0.564972	0.05801	0.00073	0.06702	0.00165	0.53601	0.01538	0.858017	418	10	530	29	436	10
BUR04-09		1	0.04901	0.00079	0.01609	0.00037	0.10874	0.00361	0.692672	103	2	148	40	105	3
BUR04-10		1.26582	0.04758	0.00053	0.0161	0.00037	0.1056	0.00269	0.902168	103	2	78	28	102	2
BUR04-11		1.42857	0.05722	0.00058	0.06883	0.00153	0.54301	0.01257	0.960254	429	9	500	24	440	8
BUR04-12		1.03093	0.04735	0.00052	0.01605	0.00036	0.10477	0.00265	0.886785	103	2	67	27	101	2
BUR04-13		1.16279	0.04908	0.00058	0.01566	0.00035	0.10596	0.00283	0.83682	100	2	152	29	102	3
BUR04-14		0.952381	0.04863	0.00075	0.01584	0.00036	0.10622	0.00344	0.701771	101	2	130	38	103	3
BUR04-15		1.1236	0.04835	0.00051	0.01578	0.00035	0.1052	0.00254	0.918635	101	2	116	26	102	2
BUR04-16		0.847458	0.04807	0.00052	0.01591	0.00035	0.10545	0.00263	0.882041	102	2	103	27	102	2
BUR04-17		1.85185	0.04915	0.00055	0.01535	0.00034	0.10401	0.00266	0.866092	98	2	155	28	100	2
BUR04-18		1.31579	0.04797	0.00055	0.01594	0.00036	0.10541	0.00276	0.862555	102	2	98	29	102	3
BUR04-19		1.13636	0.04607	0.00121	0.01579	0.00036	0.1003	0.00401	0.570265	101	2	1	53	97	4
BUR04-20		0.735294	0.04745	0.00056	0.01586	0.00036	0.10376	0.0028	0.841146	101	2	72	29	100	3
BUR05		wt. mean = 100.9 ± 0.9 Ma (2s)
BUR05-02		0.456621	0.04906	0.00092	0.01622	0.00035	0.10971	0.00392	0.603917	104	2	151	42	106	4
BUR05-03		0.518135	0.05369	0.00108	0.016	0.00035	0.11843	0.00442	0.586121	102	2	358	43	114	4
BUR05-04		0.704225	0.04752	0.00079	0.01556	0.00033	0.10193	0.00336	0.643379	100	2	75	38	99	3
BUR05-05		0.526316	0.04624	0.00113	0.01575	0.00035	0.1004	0.00427	0.522508	101	2	10	47	97	4
BUR05-06		0.793651	0.04846	0.00075	0.01531	0.00033	0.10228	0.00323	0.682538	98	2	122	35	99	3
BUR05-07		0.555556	0.04806	0.00097	0.01568	0.00034	0.10391	0.00387	0.582209	100	2	102	46	100	4
BUR05-08		0.714286	0.04502	0.00109	0.01551	0.00034	0.09624	0.00403	0.523501	99	2	-18	44	93	4
BUR05-09		0.561798	0.04964	0.00114	0.01586	0.00035	0.10852	0.00441	0.543045	101	2	178	51	105	4
BUR05-10		0.512821	0.05016	0.00105	0.0157	0.00035	0.10859	0.00418	0.579138	100	2	202	46	105	4
BUR05-11		0.534759	0.04977	0.00086	0.01554	0.00034	0.10665	0.00364	0.641043	99	2	184	39	103	3
BUR05-12		0.775194	0.04666	0.00091	0.01574	0.00035	0.10122	0.00375	0.600203	101	2	32	41	98	3
BUR05-13		0.719424	0.05213	0.00082	0.01601	0.00035	0.11506	0.00369	0.681671	102	2	291	34	111	3
BUR05-16		0.526316	0.0488	0.0009	0.01589	0.00035	0.10692	0.00381	0.618128	102	2	138	42	103	3
BUR05-17		0.588235	0.05991	0.00148	0.01604	0.00036	0.13246	0.00567	0.524324	103	2	600	51	126	5
BUR05-18		0.502513	0.04658	0.001	0.01594	0.00035	0.10234	0.00398	0.564602	102	2	28	44	99	4
	c	0.78125	0.04722	0.00084	0.01584	0.00035	0.10312	0.00358	0.636462	101	2	60	40	100	3
BUR05-19		0.574713	0.04698	0.00114	0.01577	0.00036	0.10216	0.00436	0.534891	101	2	48	51	99	4
BUR05-20		0.540541	0.0466	0.00134	0.01584	0.00036	0.10177	0.00484	0.477883	101	2	29	58	98	4
BUR06		wt. mean = 100.9 ± 0.9 Ma (2s)
BUR06-01		0.341297	0.05259	0.00098	0.01546	0.00036	0.11211	0.0041	0.636727	99	2	311	40	108	4
BUR06-02		0.416667	0.04738	0.00078	0.01567	0.00035	0.10239	0.00341	0.67066	100	2	68	37	99	3
BUR06-03		0.242131	0.04985	0.0006	0.0154	0.00035	0.10586	0.0029	0.829624	99	2	188	27	102	3
BUR06-04		0.371747	0.047	0.00096	0.01584	0.00036	0.10266	0.00394	0.592178	101	2	49	44	99	4
BUR06-05		0.383142	0.04732	0.00071	0.01514	0.00034	0.09878	0.00311	0.713283	97	2	65	34	96	3
BUR06-06		0.392157	0.04554	0.0008	0.01562	0.00035	0.09811	0.00342	0.642798	100	2	-26	31	95	3
BUR06-07		0.350877	0.04801	0.00081	0.01542	0.00035	0.10208	0.00348	0.665802	99	2	100	38	99	3
BUR06-08		0.393701	0.04671	0.0007	0.01572	0.00035	0.10124	0.00319	0.706605	101	2	34	32	98	3
BUR06-09		0.413223	0.04749	0.00067	0.01528	0.00034	0.10002	0.00302	0.736946	98	2	74	32	97	3
BUR06-10		0.395257	0.04807	0.00075	0.01514	0.00034	0.10037	0.00325	0.693543	97	2	103	35	97	3
BUR06-11		0.381679	0.04957	0.00075	0.01515	0.00034	0.10351	0.00329	0.706078	97	2	175	33	100	3
BUR06-12		0.34965	0.04723	0.00082	0.0152	0.00034	0.099	0.00341	0.649406	97	2	61	39	96	3
BUR06-13		0.543478	0.0477	0.00059	0.01529	0.00033	0.10055	0.00277	0.783445	98	2	84	28	97	3
BUR06-14		0.327869	0.04869	0.00081	0.01532	0.00034	0.10284	0.00344	0.663474	98	2	133	37	99	3
BUR06-15		0.28169	0.04856	0.00195	0.0151	0.00034	0.10107	0.00576	0.395095	97	2	127	86	98	5
BUR06-16		0.374532	0.05011	0.00081	0.01544	0.00035	0.10666	0.00355	0.681073	99	2	200	36	103	3
BUR06-17		0.401606	0.04842	0.00091	0.01552	0.00035	0.10358	0.00377	0.619599	99	2	120	42	100	3
BUR06-18		0.515464	0.04849	0.00078	0.01502	0.00032	0.10041	0.00324	0.660255	96	2	123	36	97	3
BUR06-19		0.334448	0.04701	0.00135	0.01539	0.00032	0.09977	0.00442	0.469342	98	2	50	59	97	4
Wuntho
BUR11		wt. mean = 97.2 ± 0.9 Ma (2s)
BUR11-01		0.460829	0.04784	0.00104	0.01515	0.00035	0.09992	0.004	0.577096	97	2	91	51	97	4
BUR11-02		0.46729	0.0487	0.001	0.01511	0.00035	0.10147	0.00393	0.598065	97	2	133	48	98	4
BUR11-03		0.763359	0.04757	0.00094	0.01519	0.00035	0.0996	0.00377	0.608735	97	2	78	46	96	3
BUR11-04		0.526316	0.04744	0.00122	0.01517	0.00035	0.09922	0.00441	0.519091	97	2	71	58	96	4
BUR11-05		0.546448	0.04924	0.00127	0.01504	0.00035	0.1021	0.00457	0.519912	96	2	159	60	99	4
BUR11-06		0.740741	0.04502	0.00103	0.01546	0.00036	0.09596	0.00399	0.560029	99	2	-18	44	93	4
BUR11-07		0.471698	0.04894	0.00113	0.01492	0.00035	0.10069	0.0042	0.562388	95	2	145	53	97	4
BUR11-08		0.671141	0.04608	0.00096	0.0152	0.00035	0.09656	0.00376	0.591335	97	2	2	38	94	3
BUR11-09		0.675676	0.0489	0.00101	0.01502	0.00035	0.10123	0.00394	0.598703	96	2	143	48	98	4
BUR11-10		0.505051	0.04889	0.00109	0.01499	0.00035	0.10106	0.00412	0.572728	96	2	143	51	98	4
BUR11-11		0.392157	0.04702	0.00139	0.01509	0.00035	0.09782	0.00476	0.47665	97	2	50	61	95	4
BUR11-12		0.598802	0.04741	0.0015	0.01525	0.00035	0.09966	0.00505	0.452926	98	2	70	67	96	5
BUR11-13		0.735294	0.04865	0.00111	0.01506	0.00034	0.101	0.00412	0.55345	96	2	131	52	98	4
BUR11-14		0.490196	0.04914	0.00097	0.0153	0.00034	0.10367	0.00385	0.598384	98	2	155	45	100	4
BUR11-15		0.502513	0.0465	0.00108	0.01528	0.00034	0.09798	0.00403	0.540988	98	2	24	45	95	4
BUR11-16		0.70922	0.04676	0.00258	0.01532	0.00033	0.09877	0.00702	0.30307	98	2	37	111	96	6
BUR11-17		0.478469	0.04678	0.00092	0.01508	0.00034	0.09723	0.00362	0.605577	96	2	38	41	94	3
BUR11-18		0.813008	0.04725	0.00113	0.01568	0.00035	0.10217	0.00428	0.532846	100	2	62	52	99	4
BUR11-19		0.546448	0.04833	0.001	0.01526	0.00034	0.10168	0.00389	0.582385	98	2	115	48	98	4
BUR11-20		0.480769	0.05038	0.00145	0.01522	0.00035	0.10569	0.00503	0.483192	97	2	213	65	102	5
BUR13		wt. mean = 97.7 ± 0.9 Ma (2s)
BUR13-01		0.833333	0.0466	0.00128	0.01572	0.00036	0.10102	0.00467	0.495382	101	2	29	56	98	4
BUR13-03		0.917431	0.04746	0.00119	0.01548	0.00035	0.1013	0.0044	0.52054	99	2	72	55	98	4
BUR13-04		0.925926	0.04745	0.00103	0.01527	0.00034	0.09987	0.00393	0.565825	98	2	72	47	97	4
BUR13-05		0.641026	0.0483	0.00122	0.01535	0.00035	0.10223	0.00448	0.520307	98	2	114	57	99	4
BUR13-06		0.613497	0.05173	0.0013	0.01542	0.00036	0.10995	0.00483	0.531455	99	2	273	55	106	4
BUR13-07		0.729927	0.04607	0.00237	0.01527	0.00033	0.09697	0.00626	0.334763	98	2	1	101	94	6
BUR13-08		0.613497	0.05051	0.00151	0.0155	0.00036	0.10795	0.00529	0.473956	99	2	219	66	104	5
	c	0.909091	0.0454	0.00156	0.0156	0.00038	0.09767	0.00534	0.445532	100	2	-34	68	95	5
BUR13-09		0.8	0.05202	0.00169	0.0151	0.00037	0.10829	0.00572	0.463892	97	2	286	71	104	5
BUR13-10		0.900901	0.04939	0.00098	0.01517	0.00034	0.1033	0.00386	0.5998	97	2	166	44	100	4
BUR13-11		0.909091	0.04771	0.00111	0.01492	0.00034	0.09812	0.00408	0.548034	95	2	85	51	95	4
BUR13-12		0.746269	0.04976	0.00138	0.01505	0.00035	0.10325	0.00483	0.497135	96	2	184	62	100	4
BUR13-13		0.515464	0.04605	0.0006	0.01452	0.00032	0.09218	0.00265	0.766609	93	2		26	90	2
BUR13-14		0.854701	0.04447	0.00134	0.01519	0.00035	0.09311	0.00457	0.469451	97	2	-46	57	90	4
BUR13-16		0.609756	0.04746	0.00111	0.01491	0.00034	0.09756	0.00407	0.546611	95	2	72	51	95	4
BUR13-17		0.884956	0.05819	0.00238	0.01509	0.00044	0.12105	0.00789	0.447354	97	3	537	86	116	7
BUR13-18		0.869565	0.04663	0.00275	0.01528	0.00031	0.09826	0.00709	0.28117	98	2	30	118	95	7
BUR13-19		0.970874	0.04901	0.00088	0.01535	0.00035	0.10368	0.00369	0.640661	98	2	148	40	100	3
BUR13-20		0.657895	0.04609	0.00168	0.01568	0.00037	0.09962	0.0056	0.419773	100	2	2	72	96	5
BUR22		wt. mean = 33.1 ± 0.4 Ma (2s)
BUR22-01		1.92308	0.04442	0.00271	0.00508	0.00013	0.0311	0.00258	0.308475	32.7	0.8	-49	127	31	3
BUR22-02		1.66667	0.03845	0.00398	0.00504	0.00014	0.02674	0.00342	0.217186	32.4	0.9	-382	240	27	3
BUR22-03		2.38095	0.05346	0.00348	0.00499	0.00013	0.03675	0.00322	0.297334	32.1	0.8	348	145	37	3
BUR22-04		1.75439	0.04591	0.00406	0.0053	0.00015	0.03356	0.00379	0.25061	34.1	1	-7	186	34	4
BUR22-05		1.75439	0.04845	0.00391	0.00495	0.00013	0.03304	0.00342	0.253718	31.8	0.8	121	175	33	3
BUR22-06		1.72414	0.04578	0.00363	0.0051	0.00014	0.03222	0.00332	0.266407	32.8	0.9	-14	166	32	3
BUR22-07		2.04082	0.03863	0.0033	0.00505	0.00013	0.02692	0.0029	0.238962	32.5	0.8	-371	208	27	3
BUR22-08		2.94118	0.04254	0.00165	0.00513	0.00012	0.0301	0.00176	0.400053	33	0.8	-148	85	30	2
BUR22-09		2.5641	0.04144	0.00145	0.00512	0.00012	0.02926	0.0016	0.428613	32.9	0.8	-208	80	29	2
BUR22-10		2.04082	0.03863	0.00332	0.00525	0.00014	0.02793	0.00305	0.244197	33.8	0.9	-371	208	28	3
BUR22-11		1.92308	0.05418	0.00402	0.00518	0.00015	0.03871	0.00384	0.291913	33.3	1	379	164	39	4
BUR22-12		1.5873	0.04344	0.00448	0.00509	0.00014	0.03049	0.00388	0.21614	32.7	0.9	-100	188	30	4
BUR22-13		1.47059	0.04729	0.00602	0.00508	0.00015	0.03311	0.00507	0.192832	32.7	1	64	253	33	5
BUR22-14		1.96078	0.0516	0.00402	0.0052	0.00015	0.03698	0.0038	0.280719	33.4	1	268	172	37	4
BUR22-15		2.17391	0.03821	0.00749	0.00511	0.00022	0.02691	0.00629	0.184189	33	1	-396	321	27	6
BUR22-16		1.53846	0.04616	0.00709	0.00525	0.00014	0.03338	0.00582	0.152944	33.7	0.9	6	269	33	6
BUR22-17		2.5641	0.03928	0.00242	0.00518	0.00013	0.02804	0.00233	0.30202	33.3	0.8	-332	154	28	2
BUR22-18		1.28205	0.04967	0.00759	0.00492	0.00016	0.03368	0.00611	0.179261	32	1	180	306	34	6
BUR22-19		1.38889	0.04607	0.00077	0.00558	0.00013	0.03547	0.00115	0.718576	35.9	0.8	1	31	35	1
BUR22-20		1.6129	0.03883	0.0039	0.00513	0.00014	0.02746	0.00341	0.219764	33	0.9	-359	216	28	3
Monywa
AM-3		wt. mean = 13.6 ± 0.1 Ma (2s)
AM-3-01		0.515464	0.04616	0.00338	0.00213	6e-05	0.01355	0.00125	0.305352	13.7	0.4	6	142	14	1
AM-3-02		0.502513	0.0607	0.00326	0.00216	5e-05	0.01808	0.00133	0.314676	13.9	0.3	629	110	18	1
	c	0.588235	0.05563	0.00501	0.00221	6e-05	0.01698	0.00193	0.238858	14.2	0.4	438	191	17	2
AM-3-03		0.862069	0.04847	0.00197	0.00209	5e-05	0.01399	0.00085	0.393752	13.5	0.3	122	89	14.1	0.9
AM-3-04		0.704225	0.0566	0.00218	0.00214	5e-05	0.01669	0.00097	0.402014	13.8	0.3	476	81	16.8	1
AM-3-05		0.719424	0.04684	0.00235	0.00214	5e-05	0.01382	0.00097	0.332884	13.8	0.3	41	104	13.9	1
AM-3-06		0.719424	0.05091	0.00426	0.00216	5e-05	0.01518	0.0016	0.219618	13.9	0.3	237	174	15	2
AM-3-07		0.574713	0.04944	0.00269	0.00213	5e-05	0.01449	0.00108	0.314945	13.7	0.3	169	117	15	1
AM-3-08		0.632911	0.04876	0.0038	0.00215	5e-05	0.01445	0.00142	0.236652	13.8	0.3	136	164	15	1
AM-3-09		0.571429	0.04659	0.00275	0.0021	5e-05	0.01352	0.00106	0.303684	13.5	0.3	28	116	14	1
AM-3-10		0.487805	0.04445	0.00298	0.00211	5e-05	0.01291	0.00113	0.270729	13.6	0.3	-47	135	13	1
	c	0.31348	0.05317	0.00284	0.00214	5e-05	0.01565	0.00115	0.31796	13.8	0.3	336	115	16	1
AM-3-11		0.649351	0.0501	0.00176	0.00204	4e-05	0.0141	0.00073	0.378727	13.1	0.3	200	78	14.2	0.7
AM-3-12		0.561798	0.0518	0.00266	0.00206	5e-05	0.01469	0.00106	0.336371	13.3	0.3	277	112	15	1
AM-3-13		0.378788	0.05207	0.00324	0.00213	5e-05	0.01526	0.00126	0.284298	13.7	0.3	288	135	15	1
	c	0.943396	0.04684	0.00352	0.00219	5e-05	0.01415	0.00133	0.242902	14.1	0.3	41	149	14	1
AM-3-14		0.735294	0.05288	0.00597	0.00207	5e-05	0.0151	0.00204	0.178791	13.3	0.3	324	233	15	2
AM-3-15		0.52356	0.05054	0.00439	0.00209	5e-05	0.01454	0.00157	0.221559	13.4	0.3	220	180	15	2
	c	1.0989	0.04616	0.00308	0.00213	5e-05	0.01357	0.00114	0.279425	13.7	0.3	6	130	14	1
AM-3-16		0.529101	0.04879	0.00279	0.00208	4e-05	0.01397	0.00104	0.258321	13.4	0.3	138	120	14	1
AM-3-17		0.746269	0.04418	0.00216	0.00211	5e-05	0.01286	0.00089	0.342404	13.6	0.3	-61	96	13	0.9
AM-3-18		0.714286	0.04627	0.00208	0.00207	4e-05	0.01318	0.00078	0.326521	13.3	0.3	11	87	13.3	0.8
AM-3-19		0.699301	0.04815	0.00166	0.00203	4e-05	0.0135	0.00069	0.385522	13.1	0.3	107	76	13.6	0.7
AM-3-20		0.492611	0.04922	0.00314	0.00211	5e-05	0.01429	0.00122	0.277562	13.6	0.3	158	133	14	1
c = core
Spot		Th/U	207Pb/206Pb	± 1s	206Pb/238U	± 1s	207Pb/235U	± 1s	error corr.	206Pb/238U age (Ma ± 1s)		207Pb/206Pb age (Ma ± 1s)		207Pb/235U age (Ma ± 1s)
Katha
BUR33		(detrital zircons)
BUR33-01		0.471698	0.04778	0.00112	0.0155	0.00035	0.1021	0.00425	0.542467	99	2	88	49	99	4
BUR33-02		0.3663	0.05251	0.00505	0.02579	0.00079	0.18672	0.02293	0.249438	164	5	308	221	174	20
BUR33-03		0.4	0.04821	0.00059	0.01522	0.00032	0.10115	0.00272	0.781866	97	2	110	27	98	3
BUR33-04		0.952381	0.04808	0.00046	0.01538	0.00032	0.10196	0.00225	0.942846	98	2	103	21	99	2
BUR33-05		0.240964	0.04957	0.0007	0.02473	0.00053	0.16902	0.00505	0.717296	157	3	175	35	159	4
BUR33-06		0.591716	0.04874	0.00065	0.01531	0.00034	0.10287	0.00301	0.758972	98	2	135	32	99	3
BUR33-07		0.609756	0.04607	0.00161	0.01535	0.00033	0.0975	0.00486	0.431294	98	2	1	73	94	4
BUR33-08		0.510204	0.04688	0.0017	0.01555	0.00036	0.10049	0.00544	0.427657	99	2	43	83	97	5
BUR33-09		0.653595	0.0461	0.00144	0.01512	0.00033	0.09607	0.00414	0.506465	97	2	3	62	93	4
BUR33-10		0.806452	0.05244	0.00054	0.03981	0.00084	0.28781	0.00681	0.891756	252	5	305	23	257	5
BUR33-11		0.740741	0.04737	0.00389	0.0148	0.0003	0.09664	0.00913	0.214558	95	2	68	169	94	8
BUR33-12		0.320513	0.05007	0.0005	0.01929	0.0004	0.13316	0.00303	0.911295	123	3	198	25	127	3
BUR33-13		0.632911	0.05002	0.00264	0.0154	0.00034	0.10621	0.00744	0.315174	99	2	196	118	102	7
BUR33-14		0.332226	0.0526	0.00277	0.02544	0.00068	0.18445	0.01392	0.354186	162	4	312	136	172	12
BUR33-15		0.578035	0.04988	0.00054	0.0299	0.00063	0.20561	0.00511	0.847799	190	4	189	24	190	4
BUR33-16		1.38889	0.04829	0.00048	0.0157	0.00033	0.1045	0.00236	0.930719	100	2	114	23	101	2
BUR33-17		0.684932	0.04871	0.00048	0.01564	0.00033	0.105	0.00237	0.934799	100	2	134	25	101	2
BUR33-18		0.274725	0.05945	0.0024	0.01596	0.00034	0.13081	0.007	0.398097	102	2	584	90	125	6
BUR33-19		0.45045	0.04701	0.00265	0.01568	0.00037	0.10165	0.0073	0.328579	100	2	50	115	98	7
BUR33-20		0.60241	0.04611	0.00167	0.02008	0.00043	0.12768	0.00647	0.422594	128	3	3	83	122	6
BUR33-21		0.724638	0.04684	0.00214	0.01592	0.00038	0.10279	0.00651	0.376886	102	2	41	99	99	6
BUR33-22		0.689655	0.05482	0.00057	0.06287	0.00133	0.47518	0.0113	0.889586	393	8	405	20	395	8
BUR33-23		0.666667	0.04608	0.0014	0.01624	0.00036	0.10318	0.00466	0.490824	104	2	2	61	100	4
BUR33-24		0.78125	0.05546	0.00057	0.06329	0.00134	0.48394	0.01141	0.897998	396	8	431	22	401	8
BUR33-25		0.684932	0.05579	0.00062	0.05766	0.00122	0.44345	0.01115	0.841502	361	7	444	24	373	8
BUR33-26		0.45045	0.04959	0.00495	0.02575	0.00083	0.17602	0.0225	0.252162	164	5	176	200	165	19
BUR33-27		0.421941	0.04944	0.00054	0.01745	0.00037	0.11894	0.00294	0.857802	112	2	169	23	114	3
BUR33-28		0.446429	0.05804	0.00065	0.07232	0.00164	0.57868	0.01482	0.885474	450	10	531	25	464	10
BUR33-29		0.657895	0.05019	0.00071	0.01548	0.00034	0.10711	0.00322	0.730604	99	2	204	36	103	3
BUR33-30		0.231481	0.04896	0.00049	0.0152	0.00032	0.10258	0.00235	0.91897	97	2	146	22	99	2
BUR33-32		0.609756	0.04982	0.00056	0.01995	0.00042	0.13699	0.00348	0.828736	127	3	187	25	130	3
BUR33-33		0.746269	0.05666	0.00061	0.05878	0.00125	0.45915	0.01134	0.861037	368	8	478	25	384	8
BUR33-35		0.552486	0.04607	0.0015	0.0151	0.00034	0.0959	0.0044	0.490759	97	2	2	62	93	4
BUR33-36		0.862069	0.04944	0.00055	0.0154	0.00033	0.10498	0.00266	0.845704	99	2	169	25	101	2
BUR33-37		0.806452	0.048	0.00051	0.01902	0.0004	0.12587	0.00304	0.870759	121	3	99	24	120	3
BUR33-38		0.540541	0.05451	0.00058	0.05736	0.00122	0.43105	0.01049	0.873983	360	7	392	22	364	7
BUR33-39		0.671141	0.04797	0.00055	0.01592	0.00034	0.1053	0.00273	0.823762	102	2	98	29	102	3
BUR33-40		0.214133	0.04938	0.0006	0.01708	0.00038	0.1163	0.00319	0.811119	109	2	166	27	112	3
BUR33-42		0.813008	0.04804	0.00053	0.01571	0.00034	0.10402	0.00263	0.85598	100	2	101	25	100	2
BUR33-43		0.714286	0.04773	0.00057	0.01622	0.00035	0.10673	0.00285	0.808088	104	2	86	28	103	3
BUR33-44		0.106383	0.04957	0.00106	0.0159	0.00033	0.10865	0.00374	0.602941	102	2	175	49	105	3
BUR33-45		0.769231	0.04794	0.00053	0.01578	0.00034	0.10429	0.00264	0.851159	101	2	96	28	101	2
BUR33-46		0.403226	0.05525	0.00067	0.06121	0.00129	0.46622	0.01258	0.781048	383	8	422	25	389	9
BUR33-47		0.819672	0.04946	0.00055	0.0187	0.0004	0.1275	0.00324	0.841751	119	3	170	25	122	3
BUR33-48		0.990099	0.05082	0.00065	0.01927	0.0004	0.13503	0.00376	0.745454	123	3	233	29	129	3
BUR33-50		0.49505	0.05046	0.0072	0.02512	0.00098	0.17475	0.03089	0.220702	160	6	216	298	164	27
BUR33-51		0.719424	0.04744	0.00221	0.01581	0.00036	0.10338	0.00664	0.354519	101	2	71	100	100	6
BUR33-52		0.699301	0.04811	0.00063	0.01605	0.00035	0.1065	0.00304	0.763957	103	2	105	29	103	3
BUR33-53		0.934579	0.05059	0.00053	0.01943	0.00041	0.13551	0.00324	0.882546	124	3	222	23	129	3
BUR33-54		0.671141	0.06961	0.00071	0.15538	0.00332	1.49114	0.03476	0.916604	931	19	917	21	927	14
BUR33-55		0.520833	0.0524	0.00374	0.02664	0.00071	0.19245	0.01804	0.284319	169	4	303	165	179	15
BUR33-57		0.561798	0.05559	0.0053	0.02646	0.00082	0.20277	0.02453	0.256171	168	5	436	234	187	21
BUR33-58		0.526316	0.05333	0.00084	0.04291	0.00096	0.3155	0.01025	0.688634	271	6	343	34	278	8
BUR33-59		0.458716	0.05113	0.0008	0.03115	0.00069	0.21958	0.00709	0.686021	198	4	247	33	202	6
BUR33-60		1.42857	0.05097	0.00054	0.0191	0.00041	0.1342	0.00328	0.878272	122	3	239	25	128	3
BUR33-61		0.636943	0.05399	0.00049	0.059	0.00107	0.43915	0.00913	0.872316	370	7	371	22	370	6
BUR33-62		0.591716	0.05473	0.00052	0.05851	0.0011	0.44142	0.00959	0.865358	367	7	401	20	371	7
BUR33-63		0.581395	0.05278	0.00053	0.03019	0.00053	0.21971	0.00491	0.785563	192	3	319	21	202	4
BUR33-64		1.31579	0.04865	0.00047	0.01886	0.00035	0.1265	0.00277	0.847495	120	2	131	24	121	2
BUR33-65		0.574713	0.05669	0.00056	0.03507	0.00069	0.27408	0.0062	0.869759	222	4	479	23	246	5
BUR33-66		0.341297	0.0487	0.00174	0.01578	0.0003	0.10592	0.00533	0.377803	101	2	133	80	102	5
BUR33-67		0.591716	0.04704	0.00161	0.01571	0.00031	0.10189	0.00487	0.412846	100	2	51	80	99	4
BUR33-68		0.704225	0.05211	0.001	0.03013	0.00067	0.21642	0.00792	0.607642	191	4	290	46	199	7
BUR33-69		0.724638	0.05588	0.00052	0.05892	0.00106	0.45395	0.00963	0.848057	369	6	448	21	380	7
BUR33-70		0.641026	0.0546	0.00053	0.05974	0.00114	0.44966	0.00995	0.862384	374	7	396	21	377	7
BUR33-71		0.584795	0.05481	0.00056	0.05666	0.00104	0.42818	0.00982	0.800335	355	6	404	24	362	7
BUR33-72		0.591716	0.04843	0.00053	0.01571	0.0003	0.10485	0.00256	0.78212	100	2	120	27	101	2
BUR33-73		0.740741	0.05464	0.00052	0.05719	0.0011	0.43076	0.00936	0.885181	359	7	398	22	364	7
BUR33-74		0.719424	0.05536	0.00137	0.01824	0.00039	0.1392	0.00586	0.507904	117	2	427	53	132	5
BUR33-75		0.137363	0.0493	0.00113	0.01482	0.00025	0.10071	0.00331	0.513259	95	2	162	55	97	3
BUR33-76		0.239808	0.04985	0.00099	0.01797	0.00037	0.12351	0.00449	0.566382	115	2	188	45	118	4
BUR33-77		0.724638	0.05636	0.0006	0.05706	0.00111	0.44333	0.01056	0.816685	358	7	467	22	373	7
BUR33-78		0.645161	0.05447	0.00099	0.05811	0.00115	0.43642	0.01472	0.586737	364	7	391	43	368	10
BUR33-79		0.793651	0.05335	0.00053	0.04949	0.00096	0.36403	0.00823	0.858008	311	6	344	23	315	6
BUR33-80		0.52356	0.04642	0.0019	0.02697	0.00057	0.17263	0.0097	0.37613	172	4	20	85	162	8
BUR33-81		0.584795	0.04706	0.00183	0.0154	0.0003	0.09991	0.00546	0.356465	99	2	52	88	97	5
BUR33-82		0.684932	0.04824	0.00071	0.01613	0.00032	0.10725	0.00319	0.666994	103	2	111	36	103	3
BUR33-83		0.3861	0.05437	0.00087	0.01879	0.00038	0.14084	0.00443	0.642953	120	2	386	36	134	4
BUR33-84		0.757576	0.04608	0.0013	0.016	0.00032	0.10163	0.00417	0.487434	102	2	2	59	98	4
BUR33-85		0.819672	0.04846	0.00048	0.01867	0.00035	0.12469	0.00281	0.831858	119	2	122	24	119	3
BUR33-86		1.1236	0.04884	0.0005	0.01553	0.00029	0.10455	0.0024	0.813466	99	2	140	23	101	2
BUR33-87		0.584795	0.04889	0.00051	0.01552	0.0003	0.10457	0.00246	0.821678	99	2	143	24	101	2
BUR33-88		0.675676	0.05087	0.0007	0.0159	0.00035	0.11147	0.0033	0.743558	102	2	235	30	107	3
BUR33-89		0.980392	0.05842	0.00052	0.05968	0.00108	0.48055	0.00982	0.885568	374	7	546	21	398	7
BUR33-90		0.671141	0.05626	0.00055	0.06285	0.00121	0.4874	0.01083	0.866437	393	7	463	22	403	7
BUR33-91		0.909091	0.06267	0.00081	0.05777	0.00132	0.49919	0.01441	0.791541	362	8	697	24	411	10
BUR33-92		0.961538	0.04607	0.00162	0.01547	0.00032	0.09825	0.0049	0.414759	99	2	1	69	95	5
BUR33-93		0.429185	0.05728	0.00066	0.05853	0.00109	0.46219	0.01148	0.749768	367	7	502	26	386	8
BUR33-94		0.377358	0.05445	0.00082	0.01514	0.00033	0.11361	0.00355	0.697551	97	2	390	33	109	3
BUR33-95		0.436681	0.05461	0.00409	0.01748	0.00055	0.13157	0.01342	0.308479	112	3	396	170	126	12
BUR33-97		0.735294	0.05818	0.00054	0.08334	0.0016	0.66849	0.0143	0.897481	516	10	537	20	520	9
BUR33-98		0.628931	0.04608	0.00175	0.01526	0.00032	0.09694	0.00516	0.393957	98	2	2	76	94	5
BUR33-99		0.606061	0.04609	0.00142	0.01533	0.00034	0.0974	0.00423	0.510688	98	2	2	67	94	4
BUR33-101		0.465116	0.05465	0.00058	0.05323	0.00097	0.40107	0.00945	0.773399	334	6	398	24	342	7
BUR33-102		0.694444	0.05255	0.00066	0.0299	0.00059	0.21664	0.00583	0.733248	190	4	309	26	199	5
BUR33-103		0.649351	0.05396	0.00049	0.05671	0.00108	0.4219	0.00871	0.922477	356	7	369	18	357	6
BUR33-104		0.323625	0.05572	0.00389	0.02593	0.00072	0.1992	0.01866	0.29642	165	5	441	157	184	16
BUR33-105		0.3663	0.05191	0.00049	0.04215	0.00082	0.30168	0.00658	0.891943	266	5	281	22	268	5
BUR33-106		0.571429	0.05576	0.00054	0.06949	0.00133	0.53413	0.01177	0.86856	433	8	443	20	435	8
BUR33-107		0.675676	0.05242	0.00077	0.01529	0.0003	0.11048	0.00327	0.662903	98	2	304	33	106	3
BUR33-108		0.37037	0.1339	0.0012	0.36031	0.00664	6.65128	0.13712	0.893915	1984	31	2150	16	2066	18
Calibration was performed using the GJ-1 zircon standard, well established for a precise 207Pb/206Pb age and an intercept age using isotope-dilution thermal ionization mass spectrometry (ID-TIMS) at 608.5±0.4 Ma (2σ) and 608.5±1.5 Ma (2σ), respectively (Jackson et al., 2004). The Harvard reference zircon 91500 and Australian Mud Tank Carbonatite zircon (MT) were used as secondary standards for da…

## Sheet: Table A.2 Hf data 
Supplementary Table A.2 Zircon Hf isotopic data of analyzed samples from batholiths in Myanmar
Spot		Inferred age (Ma ± 2s)		176Hf/177Hf	± 2s	176Yb/177Hf	± 2s	176Lu/177Hf	± 2s	eHf(T)	± 2s	TDM	TDMC (Ma)
Gongshan
YC-14
YC-14-01		76	2	0.282637	5.24906e-05	0.105715	0.00141772	0.00242443	4.50437e-05	-3.22277	0.928298	904.699	1350.06
YC-14-02		73	2	0.282652	3.46851e-05	0.0613985	0.000834646	0.00110235	1.22626e-05	-2.6787	0.613403	851.263	1313.49
YC-14-03		74	2	0.282715	2.51314e-05	0.0720603	0.000335204	0.00114873	2.28099e-06	-0.466042	0.444448	764.472	1173.19
YC-14-04		72	2	0.282671	3.6802e-05	0.0699179	0.000217627	0.00108792	6.99464e-06	-2.03088	0.650839	824.231	1271.46
YC-14-05		74	2	0.28265	3.51983e-05	0.101979	0.000926192	0.00156215	1.3517e-05	-2.78195	0.622481	865.928	1320.71
YC-14-06		72	2	0.282713	2.70105e-05	0.0696755	0.000588317	0.00107786	3.32386e-06	-0.562476	0.477678	765.327	1177.84
YC-14-07		71	2	0.28264	2.75291e-05	0.0590691	0.000687261	0.00095119	8.34626e-06	-3.16527	0.486847	865.811	1343
	c	74	2	0.282611	4.59673e-05	0.0924061	0.00125121	0.00156357	2.42889e-05	-4.13026	0.81293	920.471	1406.52
YC-14-08		71	2	0.282619	3.21853e-05	0.0733292	0.000829384	0.00118221	5.45987e-06	-3.92628	0.569192	901.164	1391.38
YC-14-09		72	2	0.282629	2.7961e-05	0.0678811	0.000456508	0.00108208	9.04861e-06	-3.52474	0.494487	883.776	1366.61
YC-14-10		73	2	0.282723	3.36832e-05	0.0763693	0.00111525	0.00121096	1.83006e-05	-0.191294	0.595684	753.741	1154.89
YC-14-11		71	2	0.282676	3.27876e-05	0.104113	0.000776907	0.00172391	3.82686e-05	-1.90325	0.579844	831.149	1262.43
YC-14-12		71	2	0.282669	6.07849e-05	0.118527	0.00143938	0.00259577	4.33345e-05	-2.21815	1.07497	862.633	1282.28
YC-14-13		70	2	0.282693	3.26844e-05	0.0844615	0.000843449	0.00131987	4.54657e-06	-1.30348	0.578018	797.949	1223.53
YC-14-14		71	2	0.282673	2.40183e-05	0.0770503	0.00115844	0.00125468	1.37853e-05	-1.98887	0.42476	825.051	1267.99
YC-14-15		72	2	0.282628	2.96715e-05	0.0733159	0.000380699	0.00114218	4.53427e-06	-3.58015	0.524737	887.29	1370.12
YC-14-16		72	2	0.282696	4.32107e-05	0.114923	0.00141873	0.00257884	3.36847e-05	-1.24787	0.764176	822.725	1221.23
YC-14-18		74	2	0.282706	7.37485e-05	0.176325	0.00335007	0.00370396	6.10514e-05	-0.877231	1.30424	832.645	1198.87
YC-14-19		71	2	0.282656	4.48798e-05	0.102085	0.00270679	0.0022196	5.61983e-05	-2.63564	0.793693	871.657	1308.96
YC-14-20		72	2	0.282703	2.91777e-05	0.0858843	0.000272418	0.00123097	3.793e-06	-0.915755	0.516004	782.351	1200.34
	c	69	2	0.282624	2.71263e-05	0.0743823	0.000147446	0.00140604	6.47017e-06	-3.7775	0.479722	898.468	1380.34
YC-15
YC-15-01		216	4	0.282483	4.46138e-05	0.0858656	0.00111446	0.00167591	1.84495e-05	-5.71654	0.789239	1107.08	1614.47
YC-15-02		214	5	0.282496	3.1399e-05	0.0549471	0.00110902	0.00104387	2.42508e-05	-5.21487	0.55546	1070.51	1581.35
YC-15-03		216	5	0.282448	2.47806e-05	0.0784592	0.00124331	0.00155191	3.73613e-05	-6.94578	0.43838	1153.55	1692.38
YC-15-04		204	4	0.282302	2.20497e-05	0.0307037	0.000296363	0.000696095	1.01321e-05	-12.2431	0.39006	1330.18	2018.6
YC-15-05		208	5	0.282451	2.86349e-05	0.0563381	0.000419876	0.00116594	2.04325e-05	-6.93428	0.506556	1136.7	1685.76
	c	216	4	0.28251	2.72302e-05	0.0557424	0.000931564	0.00114145	1.25e-05	-4.69922	0.481715	1053.89	1550.13
YC-15-06		218	5	0.282465	2.89532e-05	0.0520041	0.0011956	0.00103698	2.30718e-05	-6.21896	0.512199	1113.6	1648.02
YC-15-07		212	5	0.282392	2.44589e-05	0.0530133	0.000496192	0.00112378	4.29496e-06	-8.93856	0.432685	1218.67	1815.63
YC-15-08		216	5	0.282306	2.90291e-05	0.0738533	0.00058789	0.00068713	1.70348e-06	-11.8309	0.513538	1323.89	2001.55
	c	217	5	0.282464	3.54096e-05	0.0321914	0.000262591	0.00144055	1.2836e-05	-6.34455	0.626415	1127.49	1655.09
YC-15-09		215	5	0.282391	3.27872e-05	0.034098	0.000301288	0.000727183	1.75975e-05	-8.8446	0.580019	1207.01	1812.1
YC-15-10		214	4	0.282422	3.94332e-05	0.027032	0.000138109	0.000587017	5.41133e-06	-7.75673	0.697589	1159.92	1742.55
YC-15-11		214	4	0.282537	3.26487e-05	0.122332	0.00119539	0.00230256	2.35788e-05	-3.9357	0.577569	1047.55	1499.86
YC-15-12		210	4	0.282455	2.59279e-05	0.0391557	0.000789151	0.000790729	7.78637e-06	-6.71178	0.458671	1120.44	1673.29
YC-15-13		210	4	0.282478	2.87164e-05	0.0656973	0.00054317	0.00133399	1.41368e-05	-5.9901	0.508	1104.8	1627.39
YC-15-14		210	4	0.282373	2.63605e-05	0.0364019	0.000717932	0.000711478	7.66766e-06	-9.6083	0.466324	1232.36	1856.65
YC-15-15		214	5	0.282475	3.2385e-05	0.0485603	0.000941926	0.00102621	2.04265e-05	-5.96071	0.572903	1099.71	1628.64
YC-15-16		213	4	0.282359	4.91085e-05	0.0505671	0.00053888	0.0012024	3.50404e-05	-10.1123	0.868747	1268.29	1890.54
YC-15-17		211	4	0.282306	3.58231e-05	0.0322609	0.000256465	0.000659468	4.4361e-06	-11.9402	0.633721	1323.15	2004.73
YC-15-18		213	4	0.282496	4.00521e-05	0.062569	0.00195813	0.00131452	3.43301e-05	-5.27499	0.708536	1078.27	1584.33
YC-15-19		210	4	0.282419	3.65091e-05	0.0507083	0.0016398	0.00102887	2.54766e-05	-8.00728	0.645856	1177.55	1755.24
YC-15-20		213	4	0.282425	2.90694e-05	0.0243044	0.000490266	0.00051943	5.76031e-06	-7.67787	0.514249	1154.32	1736.83
Lushui
YNW-29A
YNW-29A-01		115	2	0.282428	3.89012e-05	0.118011	0.00213459	0.00205955	2.60458e-05	-9.81212	0.688028	1198.5	1797.7
YNW-29A-02		113	3	0.282506	2.34427e-05	0.0655623	0.000864432	0.00121667	9.93161e-06	-7.02923	0.41462	1061.51	1620.22
YNW-29A-03		120	3	0.282355	4.54155e-05	0.0539992	0.00142438	0.00129237	5.49661e-05	-12.2047	0.803252	1275.95	1953.11
YNW-29A-04		113	2	0.282524	3.90629e-05	0.0873919	0.0010851	0.00215835	5.26574e-05	-6.46578	0.690885	1062.86	1584.13
YNW-29A-05		116	2	0.282529	3.70025e-05	0.11975	0.00170944	0.00208797	1.89027e-05	-6.21423	0.654448	1053.27	1570.46
YNW-29A-06	c	119	3	0.282538	4.1556e-05	0.135296	0.00399371	0.00269786	0.000117411	-5.88688	0.734989	1058.05	1551.74
YNW-29A-07		117	3	0.282499	3.35134e-05	0.0714302	0.000298767	0.00136851	1.09338e-05	-7.20639	0.592738	1075.84	1634.41
YNW-29A-08		118	3	0.282501	3.08738e-05	0.0733175	0.000348544	0.00145386	1.0506e-05	-7.11564	0.546055	1075.23	1629.38
YNW-29A-09	c	116	2	0.282467	3.42203e-05	0.0555573	0.00167902	0.00117984	4.60299e-05	-8.331	0.605241	1115.01	1705.03
YNW-29A-10		122	3	0.282425	3.84118e-05	0.0869951	0.000563657	0.00157467	1.11074e-05	-9.71847	0.679383	1186.5	1797.24
YNW-29A-11		117	2	0.282464	4.27661e-05	0.0687293	0.00141263	0.00181392	5.42524e-05	-8.45956	0.756389	1138.21	1713.67
YNW-29A-12		121	3	0.282441	4.24473e-05	0.0579141	0.000700732	0.00111526	9.02737e-06	-9.13716	0.750756	1149.56	1759.89
YNW-29A-13		117	3	0.282473	5.30028e-05	0.0938916	0.00135197	0.00217988	6.27495e-05	-8.18939	0.937441	1137.37	1696.4
YNW-29A-14		116	2	0.282513	5.30229e-05	0.134502	0.00216886	0.00323233	9.74434e-05	-6.86173	0.937795	1110.81	1611.1
YNW-29A-15		122	3	0.282468	4.00151e-05	0.0896776	0.000742253	0.00185825	8.75117e-06	-8.24289	0.70774	1134.85	1703.68
YNW-29A-16	c	117	3	0.282489	3.90512e-05	0.163988	0.00175089	0.00314154	4.23928e-05	-7.6904	0.690685	1143.96	1664.39
YNW-29A-17		117	3	0.282387	5.91834e-05	0.109774	0.00210237	0.0030116	3.97915e-05	-11.2992	1.04676	1291.17	1892.73
YNW-29A-18		118	3	0.282304	5.45216e-05	0.0735478	0.00133603	0.00175933	5.69801e-05	-14.0957	0.964306	1365.08	2070.73
YNW-29A-19		123	3	0.28236	2.52316e-05	0.0412136	0.000343404	0.000869108	2.3956e-06	-11.928	0.446269	1254.67	1938.08
YNW-29A-20		117	2	0.282474	4.5903e-05	0.0826346	0.00133997	0.00190866	7.30314e-05	-8.10341	0.811869	1126.36	1691.07
YNW-30A
YNW-30A-01		119	3	0.282512	3.10731e-05	0.0557292	0.00026524	0.00100311	5.74969e-06	-6.66732	0.549581	1046.84	1601.85
	c	118	3	0.282474	3.24638e-05	0.0630619	0.000906413	0.00124261	1.76851e-05	-8.05068	0.574176	1107.18	1688.74
YNW-30A-02		116	3	0.282544	3.98197e-05	0.0910933	0.00130633	0.00167883	6.91323e-06	-5.64755	0.704274	1020	1534.63
YNW-30A-03		118	3	0.282494	3.14835e-05	0.0703568	0.000537387	0.00138795	7.49355e-06	-7.36187	0.556838	1083.42	1645.02
YNW-30A-04		118	3	0.282584	3.61634e-05	0.117233	0.000834165	0.00223305	7.18231e-06	-4.22743	0.639611	977.067	1445.77
YNW-30A-05		117	3	0.282535	3.28857e-05	0.100153	0.00115164	0.0018967	1.24711e-05	-5.97803	0.581637	1039.64	1556.29
YNW-30A-06		123	3	0.282541	3.07095e-05	0.07992	0.000240658	0.00149824	4.54838e-06	-5.58244	0.543154	1018.9	1535.84
	c	832	17	0.282136	3.37282e-05	0.0778138	0.000260795	0.00155686	1.28793e-05	-4.99477	0.597484	1595.99	2034.91
YNW-30A-07		120	3	0.282492	2.64423e-05	0.0494083	0.000603075	0.000945387	6.3747e-06	-7.34286	0.467678	1073.05	1645.48
YNW-30A-08		119	3	0.282126	3.689e-05	0.0601362	0.000268918	0.00114342	1.04241e-05	-20.3128	0.652462	1591.38	2463.27
YNW-30A-09		120	3	0.282459	3.04934e-05	0.0829932	0.00106838	0.0015257	2.64899e-05	-8.55341	0.539329	1136.6	1721.99
YNW-30A-10		117	3	0.282468	3.20975e-05	0.0628843	0.000622472	0.00125974	3.79322e-06	-8.29147	0.567696	1116.4	1703.24
YNW-30A-11		118	3	0.282418	4.43618e-05	0.120764	0.00442588	0.00214785	6.27041e-05	-10.1133	0.784612	1215.93	1818.96
YNW-30A-12		120	3	0.282483	3.21772e-05	0.0744255	0.000313121	0.00068339	1.62844e-06	-7.64624	0.569111	1078.42	1664.81
	c	119	3	0.282563	5.37466e-05	0.0331316	0.000138358	0.0014085	1.0715e-05	-4.89799	0.950601	985.868	1489.38
YNW-30A-13		119	3	0.282381	3.29693e-05	0.123698	0.00168645	0.00128735	1.71161e-06	-11.3324	0.583118	1240.19	1897.23
	c	118	3	0.282363	4.4439e-05	0.0695825	0.000285583	0.00237724	2.50091e-05	-12.0656	0.785978	1303	1942.23
YNW-30A-14		120	3	0.282465	3.5784e-05	0.0954218	0.00101801	0.00183662	1.80798e-05	-8.38528	0.632903	1138.35	1711.21
YNW-30A-15		121	3	0.282463	4.00326e-05	0.0496906	0.000714582	0.0013534	1.58926e-06	-8.39934	0.708048	1126.59	1713.05
	c	592	12	0.282371	3.33465e-05	0.0682927	0.000171672	0.000962882	9.35123e-06	-1.51214	0.590405	1243.04	1633.59
YNW-30A-16		119	3	0.282431	3.93784e-05	0.0725313	0.00106012	0.00158341	2.78375e-05	-9.56142	0.696474	1177.91	1785.05
YNW-30A-17		115	3	0.282514	4.85986e-05	0.129766	0.00250934	0.00265635	6.13131e-05	-6.81225	0.859541	1092.04	1607.43
YNW-30A-18		121	3	0.282556	3.4866e-05	0.0397445	0.000444972	0.000844247	4.80366e-06	-5.0358	0.616667	980.098	1499.81
YNW-30A-19		120	3	0.282467	3.18965e-05	0.0622171	0.000634213	0.00139846	1.63784e-05	-8.25746	0.564146	1121.28	1703.29
YNW-30A-20		118	3	0.282555	3.56137e-05	0.115851	0.00264665	0.00241635	4.87509e-05	-5.28856	0.629888	1025.23	1513.11
Longling
YN98-49A
YN98-49A-01		445	9	0.28239	3.50147e-05	0.0632661	0.000353653	0.00111283	2.65627e-06	-4.03915	0.619741	1221.05	1681.62
YN98-49A-02		466	9	0.282394	4.22214e-05	0.143117	0.000373767	0.0025164	2.35397e-05	-3.89586	0.747329	1262.96	1688.13
YN98-49A-03		472	10	0.282199	3.20939e-05	0.0669775	0.0024568	0.00118004	3.30695e-05	-10.2479	0.568077	1491.35	2093.38
YN98-49A-04		452	9	0.282517	3.65442e-05	0.0943461	0.000585665	0.00177757	6.77928e-06	0.414308	0.646821	1060.86	1404.91
YN98-49A-05		467	9	0.282332	4.11792e-05	0.0803683	0.000643976	0.00169442	4.32609e-05	-5.81849	0.728884	1323.46	1810.46
YN98-49A-06		465	9	0.282374	2.93459e-05	0.15728	0.00178363	0.00310574	2.13579e-05	-4.79845	0.519429	1313.1	1744.19
YN98-49A-07		462	9	0.282328	5.87534e-05	0.166283	0.00389407	0.0038804	0.000134169	-6.71725	1.03994	1411.45	1862.63
YN98-49A-08		461	9	0.282376	4.5095e-05	0.207785	0.00116942	0.00532972	6.88201e-05	-5.48471	0.798184	1396.94	1783.72
YN98-49A-09		439	9	0.282366	6.43627e-05	0.211102	0.00286816	0.00519096	7.12321e-05	-6.21448	1.13917	1407.24	1813.11
YN98-49A-10		456	9	0.282398	2.80934e-05	0.083078	0.00085614	0.0016967	2.12697e-05	-3.68934	0.497249	1228.51	1667.71
YN98-49A-11		463	9	0.282356	3.84704e-05	0.034623	0.000242257	0.00304054	5.85574e-06	-5.44745	0.680931	1336.96	1783.63
	c	2323	17	0.281259	2.90241e-05	0.157666	0.000501627	0.000702901	3.10319e-06	-11.7812	0.515406	2756.36	3272.26
YN98-49A-12		445	9	0.282428	3.53351e-05	0.095466	0.000793939	0.0036167	4.31477e-05	-3.44386	0.62541	1251.19	1643.38
	c	731	15	0.282305	2.89665e-05	0.174626	0.0027905	0.00191411	1.99078e-05	-1.3016	0.513016	1369.12	1725.98
YN98-49A-13		448	9	0.282347	2.76958e-05	0.112572	0.000498499	0.00228147	1.47435e-05	-5.83643	0.490204	1322.01	1797.06
YN98-49A-14		448	9	0.282345	2.76535e-05	0.0849588	0.00040781	0.00173414	1.50267e-05	-5.76074	0.489455	1306.02	1792.45
YN98-49A-15		441	9	0.282396	3.03104e-05	0.139412	0.00155819	0.00279659	2.21197e-05	-4.40054	0.536471	1269.11	1700.99
YN98-49A-16		452	9	0.282488	3.97436e-05	0.152083	0.00154125	0.00334673	0.000101852	-1.10632	0.70345	1152.24	1500.96
YN98-49A-17		464	9	0.282388	3.19553e-05	0.114182	0.00158036	0.00239467	2.44984e-05	-4.12103	0.565614	1267.84	1700.87
YN98-49A-18		464	10	0.282419	3.9028e-05	0.119594	0.00175327	0.00265937	3.6172e-05	-3.08358	0.690801	1230.85	1635.27
YN98-49A-19		447	9	0.282336	5.73432e-05	0.190215	0.00305578	0.00469292	0.000137935	-6.97062	1.01495	1432.76	1866.96
YN98-49A-20		448	9	0.28235	3.38709e-05	0.0959065	0.00148036	0.00200677	2.84619e-05	-5.65828	0.599499	1308.24	1785.9
YN98-49A-21		429	9	0.282376	3.90213e-05	0.161532	0.0029637	0.00387487	7.06584e-05	-5.67033	0.69063	1339.05	1771.72
YN98-49A-22		456	9	0.282425	2.61644e-05	0.11115	0.00208202	0.00218165	3.70927e-05	-2.88791	0.463107	1206.06	1616.94
YN98-49A-23		773	15	0.282109	4.003e-05	0.0497733	0.00108171	0.00269343	0.000157294	-7.78837	0.709024	1685.25	2165.02
	c	2112	35	0.281134	2.4486e-05	0.116212	0.00485462	0.00113256	1.57732e-05	-12.3835	0.435018	2958.29	3459.82
YN98-49A-24		461	9	0.282549	7.46407e-05	0.0727473	0.00468592	0.00671468	0.000158171	0.215336	1.32114	1171.84	1423.53
Htawgaw
BW5
BW5 01		51	2	0.282553	2.7e-05	0.0283399	0.0011	0.000852754	1.9e-05	-6.65576	0.95494	985.168	1549.96
BW5 02		50	2	0.282573	3.1e-05	0.0260067	0.00024	0.00078692	5.4e-06	-5.96759	1.09641	955.49	1505.49
BW5 03		51	2	0.28265	7.6e-05	0.0193971	0.00024	0.000700762	9e-06	-3.21993	2.68798	845.748	1331.41
	c	339	12	0.282484	7.6e-05	0.0402264	0.00075	0.00121987	3.7e-05	-3.00649	2.68968	1092.29	1535.9
BW5 04		51	2	0.282638	2.5e-05	0.020944	0.0002	0.00063317	1e-05	-3.64207	0.884203	860.996	1358.31
	c	50.2	2	0.282625	3.6e-05	0.0321154	0.0018	0.000936031	2.7e-05	-4.12911	1.27325	886.185	1388.64
BW5 05		50	2	0.282589	3.6e-05	0.022543	0.00049	0.000688951	1e-05	-5.39847	1.27325	930.7	1469.33
BW5 06		50	2	0.282575	2.5e-05	0.0765015	0.002	0.0022717	8.5e-05	-5.9459	0.884201	991.485	1503.6
BW5 07		50	2	0.282672	5.6e-05	0.0315088	0.00028	0.000955481	1.7e-05	-2.47172	1.98061	820.474	1282.91
BW5 08		49	2	0.282669	2.7e-05	0.0644203	0.0027	0.00194208	5.3e-05	-2.63107	0.954935	846.842	1292.07
BW5 09		49	2	0.282571	3.5e-05	0.0320469	0.0013	0.000983121	2e-05	-6.06609	1.23788	963.267	1510.93
BW5 10		49	2	0.282409	3.3e-05	0.0270913	0.0023	0.000854876	6.1e-05	-11.7915	1.16714	1186.53	1874.17
BW5 11		48.3	2	0.282629	2.7e-05	0.0213132	0.00024	0.00069488	1.3e-05	-4.02045	0.954934	874.973	1380.35
BW5 12		47	2	0.282558	2.8e-05	0.0176146	0.00048	0.00059464	2.6e-05	-6.55637	0.990299	971.547	1540.72
BW5 13		46.9	2	0.282571	3.5e-05	0.0266264	0.00064	0.000833919	2.8e-05	-6.10615	1.23787	959.476	1511.94
BW5 14		49	2	0.282586	2.8e-05	0.0361422	0.00046	0.00117095	1.3e-05	-5.54165	0.990303	946.885	1477.53
BW5 15		49	2	0.282659	3.3e-05	0.0388041	0.00063	0.00122906	4e-05	-2.96167	1.16714	844.909	1313.31
BW5 16		48.9	2	0.282581	2e-05	0.0893676	0.0017	0.00290173	8.7e-05	-5.77652	0.707359	1000.03	1491.79
BW5 18		48.4	2	0.282552	3e-05	0.0693446	0.0019	0.00217418	7.8e-05	-6.78893	1.06104	1022.21	1555.98
BW5 19		48	2	0.282635	3.9e-05	0.05453	0.0013	0.00174804	5.3e-05	-3.84808	1.37935	891.282	1368.86
BW5 20		48	2	0.282583	2.4e-05	0.0297123	0.001	0.00093907	1.9e-05	-5.66156	0.84883	945.29	1484.47
BW5 21		48	2	0.282541	2.6e-05	0.0224863	0.00093	0.000682301	2.5e-05	-7.13887	0.919565	997.485	1578.45
BW5 22		49	2	0.282622	2.7e-05	0.023794	0.00057	0.000756259	1.6e-05	-4.25498	0.954935	886.186	1395.79
BW9
BW9 02		54	2	0.282573	2.7e-05	0.0305392	0.001	0.000961755	4.8e-05	-5.88818	0.954946	959.912	1503.4
BW9 03		54	2	0.282617	2.4e-05	0.0798678	0.0013	0.00251845	6.8e-05	-4.38751	0.848841	936.667	1407.49
BW9 04		53	2	0.282643	2.4e-05	0.0314031	0.0008	0.000973085	9.8e-06	-3.4341	0.848839	861.712	1346.49
	c	71	2	0.282601	2.2e-05	0.128998	0.0037	0.00367863	6.1e-05	-4.66319	0.778133	991.918	1437.48
BW9 05		52	2	0.282759	6.1e-05	0.0482097	0.0027	0.00147551	4.7e-05	0.630062	2.15746	707.54	1086.43
BW9 06		52.4	2	0.282577	2.5e-05	0.109503	0.0012	0.00346481	4.1e-05	-5.86744	0.884206	1022.02	1500
BW9 07		64	2	0.282628	2.5e-05	0.109723	0.0016	0.00359474	3.7e-05	-3.84124	0.884229	948.744	1379.98
BW9 08		50	2	0.282667	6.2e-05	0.0443587	0.00096	0.00154785	3e-05	-2.66813	2.19282	840.715	1295.28
BW9 09		49.6	2	0.2827	4.5e-05	0.0549143	0.0015	0.00185985	2.4e-05	-1.51957	1.59156	800.202	1221.7
BW9 10		51	2	0.282636	2.4e-05	0.0468784	0.003	0.00150987	0.00011	-3.74235	0.848835	884.147	1364.46
BW9 11		52.4	2	0.282611	2.8e-05	0.0667358	0.0025	0.00217753	5.2e-05	-4.62035	0.990311	936.646	1421.19
BW9 12		54	2	0.282655	3.3e-05	0.0562207	0.003	0.00193924	0.00011	-3.02285	1.16716	867.016	1320.81
BW9 13		51	2	0.282628	3.3e-05	0.0444148	0.0025	0.00142659	7.5e-05	-4.02249	1.16715	893.571	1382.32
BW9 14		50	2	0.282643	2.8e-05	0.0631765	0.0033	0.00207835	9e-05	-3.53448	0.990306	887.718	1350.32
BW9 15		48	2	0.282614	2.3e-05	0.120272	0.00088	0.0037446	3.7e-05	-4.65411	0.813462	974.063	1419.5
BW9 16		48.2	2	0.282603	2.4e-05	0.0575285	0.0018	0.00200046	8.6e-05	-4.98373	0.84883	943.697	1441.18
BW9 17		52	2	0.282652	3.7e-05	0.0251465	0.00034	0.000786889	1.1e-06	-3.13068	1.30862	844.866	1326.46
	c	72	2	0.282653	2.5e-05	0.156266	0.0069	0.0047654	0.00017	-2.85616	0.884244	942.362	1323.04
Sodon
M2
M2 01		55	2	0.282573	2.5e-05	0.0204323	0.00024	0.00061798	3.2e-06	-5.8544	0.884211	951.255	1502.11
M2 02		55	2	0.282466	4.6e-05	0.0142417	0.00026	0.000442395	3e-05	-9.63244	1.62695	1095.03	1742.06
M2 03		55	2	0.282509	3.1e-05	0.0237753	0.00035	0.000683166	2.8e-05	-8.12035	1.09642	1042.09	1646.04
	c	56	2	0.282479	4e-05	0.0184792	0.00092	0.000555348	5.8e-05	-9.1552	1.41474	1080.24	1712.5
M2 04		55	2	0.282456	4.7e-05	0.0176192	0.00026	0.000540248	7.8e-06	-9.98968	1.66232	1111.69	1764.67
M2 05		53	2	0.282566	5.7e-05	0.0417054	0.001	0.00127095	8.2e-05	-6.16789	2.01599	977.75	1520.32
M2 06		55	2	0.282501	4.1e-05	0.0302369	0.00016	0.000868931	2.2e-05	-8.41004	1.45011	1058.4	1664.35
	c	56	2	0.282347	3.2e-05	0.0300972	0.00096	0.00091288	5.2e-05	-13.8371	1.13179	1274.92	2008.73
M2 08		54	2	0.282486	5.1e-05	0.0234806	0.0005	0.000690734	1.84e-05	-8.95556	1.80379	1074.33	1698.28
M2 09		55	2	0.28243	3.2e-05	0.037433	0.00047	0.0011358	5e-05	-10.9309	1.13179	1165.85	1824.02
M2 10		52	2	0.282481	4.1e-05	0.0317844	0.0016	0.000971736	6.8e-05	-9.18499	1.4501	1089.33	1711.21
M2 11		54	2	0.282509	3e-05	0.0497655	0.0039	0.00141257	0.000166	-8.16784	1.06105	1062.44	1648.01
M2 12		53	2	0.282474	3.7e-05	0.0151887	0.00022	0.000478943	4.2e-06	-9.39404	1.30863	1085	1725.43
	c	53	2	0.282547	2.9e-05	0.0249882	0.0018	0.000729009	9.2e-05	-6.82091	1.02568	990.337	1562
M2 13		54	2	0.282421	2.2e-05	0.0446533	0.0022	0.00133827	7.4e-05	-11.2776	0.778104	1184.87	1845.12
M2 14		53	2	0.28239	3.9e-05	0.0247158	0.0014	0.000790603	6.6e-05	-12.3759	1.37936	1210.99	1914.17
M2 15		54	2	0.282456	2.7e-05	0.0141836	0.00077	0.000447755	3.6e-05	-10.0079	0.954946	1109.01	1765.12
M2 16		54	2	0.282505	2.7e-05	0.0410596	0.0012	0.00130574	8.4e-05	-8.30551	0.954946	1065.07	1656.79
M2 17		51	2	0.282535	3e-05	0.0510648	0.0038	0.00147538	0.00022	-7.31337	1.06104	1027.25	1591.5
M2 18		52	2	0.282423	3.6e-05	0.0159876	7.9e-05	0.000537394	1.3e-05	-11.2214	1.27326	1157.31	1840.47
	c	53	2	0.282425	2.6e-05	0.0177347	0.00017	0.000548328	5.6e-06	-11.1295	0.919576	1154.87	1835.39
M2 19		53	2	0.282476	3.4e-05	0.0373619	0.0019	0.00119537	0.000126	-9.34838	1.20252	1102.86	1722.22
M2 20		52	2	0.282484	3e-05	0.0320396	0.0011	0.00102495	7.6e-05	-9.08072	1.06105	1086.65	1704.57
M7
M7 01		54	2	0.282828	7.5e-05	0.0520139	0.002	0.00159508	4.6e-05	3.10816	2.65263	610.639	929.518
M7 02		52	2	0.282887	3.4e-05	0.0269322	0.00052	0.000925018	2.6e-05	5.1761	1.20252	516.328	795.622
M7 03		52.5	1.8	0.282882	4.2e-05	0.0232634	0.0013	0.000795442	3.9e-05	5.01443	1.48547	521.611	806.379
M7 05		51	2	0.283082	9.3e-05	0.0499282	0.00064	0.00182568	2.5e-05	12.0212	3.28924	245.467	354.954
M7 04		51	2	0.282887	5.6e-05	0.028436	0.00069	0.000968463	2e-05	5.1533	1.98062	516.925	796.314
M7 06		51	2	0.282933	6.4e-05	0.0368846	0.00067	0.00124509	1.5e-05	6.77091	2.26356	455.043	692.549
M7 07		50.6	2	0.282967	5.4e-05	0.0491629	0.0013	0.00167552	3e-05	7.95058	1.90988	411.167	616.484
M7 08		51	2	0.282972	6.9e-05	0.0728983	0.0019	0.00231819	5.6e-05	8.11411	2.4404	411.097	606.256
M7 09		51	2	0.282824	5.6e-05	0.0295101	0.0011	0.0010003	4.6e-05	2.92403	1.98062	606.646	939.08
M7 10		47.5	2	0.282928	4.7e-05	0.0675127	0.0018	0.0023309	3e-05	6.48603	1.66229	476.042	708.062
M7 11		51	2	0.283156	7.5e-05	0.0578941	0.0029	0.00198606	0.00011	14.633	2.65261	138.088	186.523
M7 12		51	2	0.282962	4.8e-05	0.0303751	0.0011	0.00101271	2.7e-05	7.80442	1.69767	411.014	626.214
M7 13		49	2	0.282939	4.6e-05	0.0363216	0.00066	0.00119642	1.1e-05	6.94242	1.62693	445.885	680.008
M7 14		48.8	2	0.28303	5.1e-05	0.0919206	0.0018	0.00339328	6.9e-05	10.0859	1.80377	335.557	477.793
M7 16		49.1	2	0.282892	6.7e-05	0.0509066	0.0017	0.0015337	3.6e-05	5.27131	2.36966	517.618	787.244
M7 17		50	2	0.283044	8.1e-05	0.0454891	0.0017	0.0014547	2.6e-05	10.6687	2.86481	297.821	441.276
M7 19		51	2	0.282937	3.9e-05	0.0400145	0.0011	0.00119612	1.3e-05	6.91403	1.37936	448.736	683.367
M7 20		51	2	0.283032	5.2e-05	0.0392004	0.00041	0.00124543	2.6e-05	10.2723	1.83914	313.349	467.561
M7 21		52.5	1.8	0.282935	5.6e-05	0.0510947	0.00055	0.00162248	1.8e-05	6.86026	1.98062	456.805	687.943
M7 22		51	2	0.283031	4e-05	0.0448824	0.0011	0.00143243	1.5e-05	10.2307	1.41473	316.37	470.236
M7 23		51	2	0.283052	5.6e-05	0.0596779	0.0013	0.00116902	5.1e-05	10.9823	1.98062	284.095	421.872
M7 24		49.1	2	0.283042	5.8e-05	0.0398092	0.0023	0.0019002	7.9e-05	10.5646	2.05134	304.365	447.268
M8
M8 01		50.9	2	0.282853	5.2e-05	0.168028	0.0021	0.00615441	0.00011	3.77426	1.83914	655.414	883.931
M8 02		51	2	0.282912	3.9e-05	0.135674	0.0022	0.00498754	0.00013	5.90209	1.37936	539.109	747.963
M8 03		51	2	0.282919	5e-05	0.11269	0.002	0.00430091	9.1e-05	6.1728	1.76841	517.418	730.677
M8 04		53	2	0.282946	5e-05	0.118979	0.0014	0.00430399	5.3e-05	7.16586	1.76841	475.441	668.538
M8 05		52	2	0.283008	3.6e-05	0.159453	0.0027	0.00544057	0.00014	9.30053	1.27326	391.834	530.664
M8 07		55	2	0.283002	6.7e-05	0.114907	0.0023	0.00459328	0.0001	9.17422	2.36969	391.486	541.133
M8 08		48	2	0.28305	2.1e-05	0.13829	0.0049	0.0051627	0.00021	10.7213	0.742726	321.334	436.243
M8 09		44.8	2	0.283171	7e-05	0.0673061	0.0055	0.00227979	0.00012	15.0268	2.47574	117.019	156.278
M8 10		61	2	0.28309	2.8e-05	0.104178	0.003	0.00356497	5.4e-05	12.4417	0.99033	245.451	335.588
M8 11		56	2	0.282926	3.7e-05	0.151409	0.0047	0.00525651	0.00016	6.4806	1.30864	521.061	714.707
M8 12		62	2	0.282963	5.8e-05	0.0914448	0.0025	0.00324371	8.3e-05	7.98263	2.0514	435.48	623.119
M8 13		51	2	0.282732	7.6e-05	0.0399862	0.00083	0.00138842	5.2e-05	-0.342913	2.68798	744.434	1147.8
M8 14		55	2	0.282947	6.5e-05	0.10787	0.0024	0.00400945	9e-05	7.25017	2.29895	469.843	664.689
M8 15		64	2	0.282979	5.6e-05	0.0492832	0.0043	0.00168244	0.00015	8.6542	1.98067	393.87	581.61
M8 16		59	2	0.283023	5e-05	0.100402	0.0011	0.00336661	6.3e-05	10.0405	1.76844	345.936	488.589
	c	62	2	0.283005	5.1e-05	0.0630875	0.0021	0.00219574	0.0001	9.51106	1.80382	361.241	524.984
M8 17		52	2	0.282941	3.2e-05	0.19213	0.0033	0.00635218	0.00021	6.89955	1.13178	513.961	684.686
M8 18		55	2	0.283073	2.7e-05	0.179939	0.0031	0.00560128	0.00012	11.6488	0.954948	288.272	381.967
M8 19		57	2	0.283117	4.8e-05	0.164682	0.0026	0.00516168	0.0001	13.2581	1.69769	213.895	279.86
Sedawgyi
D-1
D-1-01		491	9	0.282368	1.61333e-05	0.0186203	6.39602e-05	0.0008311	6.24677e-06	-3.74368	0.285579	1242.87	1698.02
D-1-02		491	9	0.28242	1.3393e-05	0.0168292	0.000130321	0.000769206	7.89307e-06	-1.88913	0.237073	1168.74	1580.79
D-1-03		494	9	0.282388	1.6326e-05	0.0264916	0.000326021	0.00115088	2.60382e-05	-3.15422	0.28899	1225.88	1660.71
	c	482	10	0.282364	1.80945e-05	0.0399176	0.000931408	0.00160835	7.1416e-05	-4.15144	0.320296	1275.01	1723.59
D-1-04	c	510	10	0.282425	2.38174e-05	0.0302422	0.000199074	0.00120629	1.21892e-05	-1.83843	0.421598	1174.63	1577.51
D-1-05		490	9	0.282374	1.6734e-05	0.0201925	3.77412e-05	0.000903276	3.88953e-06	-3.57359	0.296212	1237.6	1687.26
D-1-07		493	9	0.282399	1.62337e-05	0.0182829	7.72238e-05	0.000805701	4.65168e-06	-2.63808	0.287357	1198.88	1628.15
D-1-08		492	9	0.28237	1.65614e-05	0.0282437	0.000108469	0.00121028	8.67913e-06	-3.79412	0.293158	1252.49	1701.12
D-1-09		494	9	0.282379	1.45992e-05	0.0175799	7.7045e-05	0.000784622	4.24683e-06	-3.33588	0.258423	1225.92	1672.26
	c	470	9	0.282434	2.70921e-05	0.0442973	0.00062944	0.00180865	4.73045e-05	-1.74076	0.479564	1181.86	1571.22
D-1-10		488	9	0.282399	1.69063e-05	0.017927	7.36087e-05	0.000822239	3.26308e-06	-2.648	0.299262	1199.58	1628.78
D-1-11		496	9	0.282367	1.69308e-05	0.0196437	4.5853e-05	0.000886582	3.34263e-06	-3.81128	0.299696	1246.64	1702.28
D-1-12		496	9	0.282376	1.51657e-05	0.0244535	7.75543e-05	0.00106827	6.87295e-06	-3.52713	0.268452	1239.04	1684.29
D-1-13		492	9	0.282399	1.60555e-05	0.0211994	0.000248216	0.000926077	2.19445e-05	-2.66686	0.284202	1202.27	1629.95
D-1-14		492	9	0.282346	1.54178e-05	0.0190147	4.33114e-05	0.000858809	3.64812e-06	-4.53786	0.272915	1274.68	1748.17
D-1-15		497	9	0.282351	1.34103e-05	0.0178126	4.31184e-05	0.000805865	2.40123e-06	-4.35138	0.237378	1266.26	1736.41
D-1-16		493	9	0.282351	1.4686e-05	0.0218167	0.000105309	0.00107283	8.70275e-06	-4.41127	0.25996	1274.13	1740.12
D-1-17		485	9	0.28243	1.38571e-05	0.0154064	0.000118441	0.00072408	6.43053e-06	-1.53165	0.245287	1153.89	1558.18
D-1-18		487	9	0.282372	1.43104e-05	0.0181307	3.97334e-05	0.000817195	1.85634e-06	-3.58783	0.253312	1236.46	1688.18
D-1-19		493	9	0.282335	1.72482e-05	0.0178467	0.000315254	0.000795477	2.61395e-05	-4.91136	0.305315	1288.05	1771.76
D-1-20		502	9	0.282365	1.45546e-05	0.0212582	0.000107179	0.000926897	1.00887e-05	-3.89188	0.257635	1250.63	1707.36
D-1-21		495	10	0.282405	2.12621e-05	0.0340923	0.000319344	0.0014027	2.1345e-05	-2.62978	0.376365	1209.89	1627.51
D-1-22		20.1	0.4	0.282496	4.17248e-05	0.0117783	2.47813e-05	0.000602426	2.6714e-06	-9.32022	0.737814	1057.64	1696.02
	c	485	10	0.282347	2.04929e-05	0.036059	0.000235678	0.00143754	1.8151e-05	-4.66935	0.36275	1292.12	1756.32
D-1-23		19.2	0.5	0.282499	3.08487e-05	0.0103483	8.17465e-05	0.000543416	6.53978e-06	-9.23937	0.545492	1052.11	1690.24
	c	517	10	0.28243	2.05764e-05	0.0161639	6.81046e-05	0.00070031	4.66482e-06	-1.50165	0.364227	1152.29	1556.29
D-1-24		20.3	0.4	0.282648	2.224e-05	0.0150601	8.29165e-05	0.000741818	6.66679e-06	-3.94366	0.393268	849.203	1354.28
	c	494	10	0.282404	1.91993e-05	0.0288822	7.40175e-05	0.00109762	2.866e-06	-2.55812	0.339852	1201.21	1623.04
D-1-25		489	10	0.282376	1.73648e-05	0.0483563	0.000418463	0.00166689	2.60826e-05	-3.72842	0.307378	1259.24	1696.86
D-2
D-2-01		17.1	0.4	0.282483	1.47669e-05	0.0331081	0.000288975	0.00125375	2.03227e-05	-9.85925	0.261119	1094.61	1727.64
	c	17.4	0.4	0.282522	2.79552e-05	0.0544345	0.000605728	0.00193568	4.42207e-05	-8.47425	0.494325	1058.19	1639.47
D-2-02		16.9	0.4	0.282475	1.35007e-05	0.0604084	0.000384829	0.00222107	3.18077e-05	-10.166	0.238729	1135.7	1746.62
D-2-03		16.9	0.5	0.282514	1.62025e-05	0.0413215	0.000370721	0.00157772	2.69221e-05	-8.76891	0.286506	1060.05	1658.33
D-2-04		17	1	0.282486	1.59705e-05	0.0320727	0.000310359	0.00124541	2.29215e-05	-9.76847	0.282402	1090.75	1721.88
	c	15.9	0.5	0.282559	2.84819e-05	0.0352028	0.000161743	0.00135415	1.13229e-05	-7.18606	0.503639	990.327	1557.91
D-2-05		17.3	0.3	0.282455	1.33404e-05	0.050464	0.000173088	0.00191658	1.3848e-05	-10.8622	0.235896	1154.75	1790.88
D-2-06		17.1	0.4	0.282529	1.39806e-05	0.0607889	0.000639934	0.00234516	3.92014e-05	-8.23826	0.247216	1060.18	1624.32
D-2-09		17.2	0.3	0.282473	1.68504e-05	0.0422856	0.000102878	0.00159972	7.01302e-06	-10.2303	0.297962	1119.6	1751
D-2-13		16.8	0.4	0.282515	1.48422e-05	0.0874119	0.000343944	0.00315472	2.12947e-05	-8.74862	0.262451	1105.39	1656.33
D-2-16		16.9	0.4	0.282572	2.23725e-05	0.0758924	0.000141938	0.00278156	8.15127e-06	-6.7473	0.395607	1010.66	1529.49
D-2-17		17.2	0.7	0.282488	1.56588e-05	0.0381548	0.000305144	0.00144541	2.08281e-05	-9.67019	0.276891	1092.55	1715.56
D-2-18		17	0.3	0.28253	1.50805e-05	0.0835765	0.000470449	0.00304261	3.23803e-05	-8.23504	0.266666	1080.42	1623.81
D-2-19		17.7	0.4	0.282507	1.29702e-05	0.051948	9.43408e-05	0.00204957	7.97709e-06	-9.00676	0.22935	1083.17	1673.21
D-2-21		16.2	0.3	0.282613	3.17743e-05	0.0301714	0.000329533	0.00108315	2.03877e-05	-5.25671	0.561858	906.387	1435.32
D-2-22		421	8	0.282398	2.83267e-05	0.0631133	0.000488019	0.00242775	3.6373e-05	-4.65373	0.501341	1254.25	1701.94
D-2-23		18.2	0.4	0.282493	2.17617e-05	0.0407604	0.000355787	0.00155423	2.2979e-05	-9.49701	0.384807	1088.72	1704.53
D-2-24		18.1	0.5	0.282629	6.36267e-05	0.0456373	0.000366495	0.00169888	2.51375e-05	-4.68905	1.1251	898.152	1399
Belin-Kyaukse
BelinA
BelinA-01		44.7	1	0.282593	3.14326e-05	0.0538493	0.00216648	0.00127013	3.24612e-05	-5.39836	1.1117	939.887	1465.14
BelinA-02		43.9	0.9	0.282591	5.75499e-05	0.0482881	0.000850208	0.00163981	2.02725e-05	-5.47318	2.0354	951.167	1469.18
BelinA-03		41	1	0.282596	2.24518e-05	0.0235462	0.000845829	0.000680783	2.23684e-05	-5.35216	0.794059	921.055	1459.6
	c	45	1	0.282592	2.65588e-05	0.0186166	0.000660721	0.000585489	2.12884e-05	-5.39756	0.939323	924.035	1465.53
BelinA-04		46	1	0.282592	2.70305e-05	0.021368	0.000182878	0.000653973	1.54359e-06	-5.38364	0.956007	925.915	1465.38
BelinA-05		42.9	1	0.282606	3.80124e-05	0.0659946	0.00228717	0.00208168	9.42456e-05	-4.99701	1.3444	941.764	1438
BelinA-06		51	1	0.282608	3.17839e-05	0.0267444	0.000406639	0.000759313	8.07705e-06	-4.71632	1.12414	906.203	1426.66
	c	50	1	0.282603	3.24335e-05	0.0414374	0.000427198	0.00121577	1.11056e-05	-4.90518	1.14711	923.331	1437.79
BelinA-07		47.1	1	0.282636	2.52868e-05	0.0416556	0.0010832	0.00122129	2.11957e-05	-3.81623	0.894338	877.389	1366.3
BelinA-09		45.2	0.9	0.282603	2.36187e-05	0.0415819	0.000325635	0.0011721	5.59087e-06	-5.01842	0.835339	922.782	1441.38
BelinA-10		46.4	1	0.28261	4.20146e-05	0.0356683	0.00153283	0.00110806	4.71834e-05	-4.72826	1.48596	910.719	1423.85
BelinA-11		45.5	1	0.282602	2.90834e-05	0.0371047	0.000968137	0.00101626	2.81287e-05	-5.05452	1.02861	920.845	1443.95
	c	46.5	1	0.282599	2.68022e-05	0.0435645	0.000440312	0.00116301	9.52169e-06	-5.13803	0.947934	928.451	1449.97
BelinA-12		46.6	1	0.28261	3.08787e-05	0.0387383	0.000541652	0.00109912	1.76793e-05	-4.75102	1.09211	911.592	1425.45
BelinA-13		46	0.9	0.282618	2.6554e-05	0.0475764	8.06441e-05	0.00121741	3.1167e-06	-4.49148	0.939156	903.421	1408.45
BelinA-14		45.7	1	0.282592	2.767e-05	0.0227924	4.44938e-05	0.000624333	1.34883e-06	-5.38817	0.978626	925.155	1465.45
BelinA-15		45.5	1	0.282614	3.15828e-05	0.0268694	0.000168161	0.000674737	5.69653e-06	-4.62416	1.11701	895.998	1416.67
BelinA-16		47.4	1	0.282612	4.87609e-05	0.0739995	0.00169696	0.00208513	7.2389e-05	-4.69631	1.72457	933.316	1422.27
BelinA-17		45	1	0.282578	3.48622e-05	0.0312039	0.000382148	0.000777587	6.98698e-06	-5.89414	1.23299	948.128	1497.05
BelinA-19		44.9	1	0.282655	3.01332e-05	0.112124	0.0015264	0.00242882	2.74456e-05	-3.23416	1.06574	879.086	1327.24
BelinA-20		48.1	1	0.282613	2.83508e-05	0.0790025	0.00169573	0.0019818	5.02849e-05	-4.63308	1.00271	928.829	1418.81
MEC
MEC-01		45.4	0.9	0.282643	3.29013e-05	0.044668	0.00127714	0.00136657	4.70278e-05	-3.60223	1.16364	870.573	1351.34
MEC-03		41.7	0.8	0.282613	2.60113e-05	0.0890894	0.000938124	0.00226854	1.56078e-05	-4.78648	0.919952	936.693	1423.64
MEC-06		47	1	0.282632	3.32278e-05	0.0360282	0.000615836	0.00091228	1.23152e-05	-3.95332	1.17519	875.961	1375.03
MEC-07		45.2	0.9	0.282661	4.07424e-05	0.0900024	0.00353221	0.00302215	0.000158775	-3.0308	1.44096	884.656	1314.35
MEC-08		46.1	1	0.282524	3.19622e-05	0.0489627	0.00209783	0.00155765	9.21929e-05	-7.82453	1.13043	1045.89	1620.23
BUR37
BUR37-01		44.5	2	0.282503	2.07775e-05	0.00190014	1.20488e-05	0.00190014	1.20488e-05	-8.57768	0.73485	1084.47	1666.67
BUR37-02		45	2	0.28247	2.36869e-05	0.000821906	5.99287e-06	0.000821906	5.99287e-06	-9.7327	0.837751	1100.95	1740.76
BUR37-03		45.1	2	0.28253	3.33572e-05	0.00256261	1.38314e-05	0.00256261	1.38314e-05	-7.64327	1.17977	1065.31	1607.57
BUR37-05		44.3	2	0.28252	3.07847e-05	0.00211974	4.74842e-05	0.00211974	4.74842e-05	-7.98992	1.08878	1066.49	1629.14
BUR37-06		43.8	2	0.282526	3.80773e-05	0.00209918	0.000100761	0.00209918	0.000100761	-7.81503	1.3467	1058.34	1617.68
BUR37-07		45	2	0.28252	2.4053e-05	0.000935125	8.29785e-06	0.000935125	8.29785e-06	-7.95281	0.850698	1033.58	1627.79
BUR37-08		45	2	0.282505	1.92749e-05	0.00179517	2.76255e-05	0.00179517	2.76255e-05	-8.50353	0.68171	1078.93	1662.39
BUR37-10		45	2	0.282479	1.89995e-05	0.00121069	3.77129e-05	0.00121069	3.77129e-05	-9.40031	0.671968	1098.62	1719.51
BUR37-11		44	2	0.282633	3.58403e-05	0.0026297	0.000121446	0.0026297	0.000121446	-4.02477	1.26758	915.892	1376.82
BUR37-12		44	2	0.282488	1.91995e-05	0.000829134	2.00895e-05	0.000829134	2.00895e-05	-9.10224	0.679041	1075.4	1700.02
BUR37-13		45	2	0.282527	1.73906e-05	0.00216695	2.24397e-05	0.00216695	2.24397e-05	-7.75446	0.615063	1058.75	1614.71
BUR37-14		46	2	0.282453	1.65607e-05	0.00125351	5.40677e-06	0.00125351	5.40677e-06	-10.3152	0.585715	1137.19	1778.23
BUR37-15		45	2	0.282462	1.4168e-05	0.0011488	1.28032e-05	0.0011488	1.28032e-05	-10.0237	0.501088	1121.71	1759.06
BUR37-16		44	2	0.282464	1.96115e-05	0.000787741	1.35299e-05	0.000787741	1.35299e-05	-9.9527	0.693611	1107.83	1753.97
BUR37-17		44.3	2	0.282493	2.0408e-05	0.00142532	1.56585e-05	0.00142532	1.56585e-05	-8.94748	0.721782	1085.91	1690.18
BUR37-18		45	2	0.282467	1.94186e-05	0.00166526	2.75562e-05	0.00166526	2.75562e-05	-9.8463	0.686791	1129.53	1747.57
BUR37-19		44.4	2	0.282508	2.3386e-05	0.00150621	8.81326e-06	0.00150621	8.81326e-06	-8.40036	0.827108	1066.25	1655.51
BUR37-20		44.1	2	0.282477	2.3285e-05	0.00205364	5.33182e-05	0.00205364	5.33182e-05	-9.52746	0.823536	1127.24	1726.51
Payangazu-Yebokson
K2
K2-01		125	2	0.282671	2.7717e-05	0.0546422	0.00014151	0.00189911	7.22803e-06	-1.04076	0.980452	843.045	1246.49
K2-02		126	3	0.28251	2.53138e-05	0.0392137	0.000142089	0.00143435	1.03422e-05	-6.6897	0.895441	1061.38	1605.71
K2-03		122	3	0.282523	2.46237e-05	0.0245997	9.10253e-05	0.000872901	4.17517e-06	-6.18312	0.871032	1027.4	1573.75
K2-04		122	3	0.282393	8.4324e-05	0.0376845	0.000125043	0.00142178	9.73442e-06	-10.8402	2.98285	1227.42	1868.61
K2-05		125	2	0.282556	3.23591e-05	0.0442063	0.00015146	0.00153514	1.06541e-05	-5.06196	1.14466	998.338	1502.35
K2-06		119	2	0.28251	3.87964e-05	0.0608712	0.000364814	0.00215188	2.54143e-05	-6.77116	1.37237	1083.13	1610.62
K2-07		120	2	0.282549	2.72816e-05	0.0400758	0.000492425	0.00143815	3.43759e-05	-5.31468	0.965049	1006.22	1518.43
K2-08		121	2	0.282583	3.77462e-05	0.0440496	0.000130422	0.00157286	1.00999e-05	-4.13549	1.33522	961.826	1443.48
K2-09		120	2	0.282627	2.80409e-05	0.0248508	4.34862e-05	0.000899286	2.39691e-06	-2.50204	0.99191	882.028	1339.76
K2-10		124	3	0.282627	2.13268e-05	0.0266463	3.18925e-05	0.000969032	3.05445e-06	-2.50646	0.754409	883.609	1340.02
K2-11		123	2	0.282447	3.26904e-05	0.0309634	4.16232e-05	0.00108561	1.69791e-06	-8.89245	1.15638	1140.25	1745.48
K2-13		124	3	0.282596	3.23506e-05	0.0218517	4.80756e-05	0.000799893	3.80797e-06	-3.61494	1.14436	924.103	1410.59
K2-14		120	2	0.282563	4.2673e-05	0.0430657	0.000212927	0.00159685	1.62512e-05	-4.8232	1.5095	990.152	1487.17
K2-15		125	2	0.282544	3.6755e-05	0.0395094	0.000227018	0.00145205	1.61754e-05	-5.49545	1.30016	1013.82	1529.91
K2-16		124	3	0.282586	3.03672e-05	0.026546	0.000121175	0.000985592	6.66336e-06	-3.98054	1.0742	942.591	1433.79
K2-17		119	2	0.282554	2.67621e-05	0.0481109	0.000241878	0.00170913	1.77307e-05	-5.15366	0.946673	1006.17	1508.12
K2-18		128	3	0.282548	3.25949e-05	0.03346	7.87655e-05	0.0011742	4.14842e-06	-5.33796	1.153	1000.93	1519.99
K2-19		124	3	0.282642	2.90751e-05	0.0297447	9.39439e-05	0.00106087	4.06676e-06	-2.00913	1.02849	865.627	1308.34
K2-20		124	3	0.282577	4.21405e-05	0.0449451	0.000102182	0.00161528	6.57967e-06	-4.35381	1.49066	971.613	1457.34
K1
K1-01		49	1	0.282557	3.53527e-05	0.0253841	0.000168001	0.000912081	9.87671e-06	-6.54182	1.25035	981.269	1541.94
K1-02		50	1	0.282561	3.83668e-05	0.0226652	3.72746e-05	0.000866259	4.74664e-06	-6.38333	1.35696	973.862	1531.89
K1-03		49	1	0.282672	3.90947e-05	0.0203549	5.36368e-05	0.000761835	1.72737e-06	-2.45036	1.3827	815.692	1281.6
K1-04		50	2	0.282596	4.03923e-05	0.024691	4.38343e-05	0.000922914	2.00679e-06	-5.16435	1.4286	926.856	1454.36
K1-05		49	1	0.282556	3.52273e-05	0.0263559	0.000162373	0.00098162	8.96662e-06	-6.56135	1.24592	983.76	1543.16
K1-07		53	1	0.282637	3.35891e-05	0.0206631	4.92942e-05	0.000761125	1.75477e-06	-3.71822	1.18798	865.895	1362.37
K1-08		50	1	0.282641	3.5014e-05	0.0218586	3.51526e-05	0.000835832	1.19478e-06	-3.57108	1.23838	861.669	1352.98
K1-09		50	1	0.282638	3.48999e-05	0.0264424	9.44295e-05	0.000966252	7.41471e-06	-3.68372	1.23434	868.959	1360.12
K1-10		50	1	0.282596	3.97786e-05	0.0204417	4.31553e-05	0.000770274	2.02271e-06	-5.14503	1.40689	922.564	1453.18
	c	49	1	0.282596	3.14281e-05	0.0440367	0.000228374	0.00153719	1.0768e-05	-5.19542	1.11155	942.601	1456.15
K1-11		49	1	0.2826	3.95542e-05	0.019663	9.94424e-05	0.000712841	6.05453e-06	-5.0082	1.39896	915.84	1444.49
K1-12		51	1	0.28259	4.09212e-05	0.0244541	3.74757e-05	0.000878717	1.33033e-06	-5.38541	1.4473	934.6	1468.44
K1-13		49	1	0.28258	3.30715e-05	0.0274945	9.91489e-05	0.000970276	4.33548e-06	-5.70864	1.16968	949.596	1488.96
K1-14		49	1	0.282694	3.94802e-05	0.0367194	9.7774e-05	0.00130624	4.64234e-06	-1.69923	1.39634	796.643	1233.59
K1-15		53	1	0.282596	3.36629e-05	0.0226818	5.42304e-05	0.000821371	2.6919e-06	-5.15238	1.19059	924.032	1453.63
K1-16		50	1	0.28262	2.96583e-05	0.0257213	0.00017418	0.000953441	8.87797e-06	-4.30178	1.04896	893.269	1399.47
K1-17		51	1	0.282584	3.09333e-05	0.0263218	6.12255e-05	0.000932033	2.51627e-06	-5.58268	1.09405	943.683	1480.97
K1-18		50	1	0.282595	2.91803e-05	0.0278875	6.48295e-05	0.00101282	2.51634e-06	-5.19489	1.03205	930.163	1456.28
K1-19		51	1	0.282564	3.11531e-05	0.021718	2.71031e-05	0.000783947	1.33042e-06	-6.3018	1.10182	968.634	1526.73
K1-20		48	1	0.282623	3.35075e-05	0.0257026	0.000191625	0.00095956	1.06553e-05	-4.1895	1.1851	888.939	1392.32
	c	50	1	0.282599	3.32962e-05	0.0823717	0.00112296	0.00282453	7.30755e-05	-5.0984	1.17762	970.568	1449.56
A8
A8-01		20.8	0.4	0.282506	1.51721e-05	0.0394624	0.000110957	0.0015232	8.89884e-06	-8.96137	0.536574	1069.38	1673.34
	c	366	7	0.282409	2.64335e-05	0.0304003	0.000519252	0.00105844	2.99654e-05	-5.06483	0.935552	1193.61	1686.7
A8-02		40	0.8	0.282504	1.46807e-05	0.0136235	8.53741e-05	0.00050388	5.45756e-06	-8.61435	0.519216	1044.14	1666.2
A8-03		52	2	0.282511	1.40041e-05	0.0100494	8.90005e-05	0.000382237	6.49121e-06	-8.11608	0.4953	1031.64	1643.63
A8-04		20.6	0.7	0.282483	1.57762e-05	0.0398817	0.000149913	0.00154295	1.13888e-05	-9.79712	0.557937	1103.59	1726.33
A8-05		34.2	0.6	0.282474	1.45214e-05	0.0318998	0.000221507	0.0011705	1.52339e-05	-9.817	0.513575	1105	1737.85
A8-06		46.9	0.9	0.282502	1.28108e-05	0.0378216	0.00025368	0.00146584	1.61132e-05	-8.56492	0.453091	1073.86	1667.85
A8-07		21.4	0.6	0.28248	1.50554e-05	0.0209639	7.06378e-05	0.000810926	5.15722e-06	-9.87761	0.532447	1085.89	1731.77
A8-08		106	2	0.282621	1.42431e-05	0.0236245	6.93977e-05	0.000905001	5.69596e-06	-3.08016	0.503814	891.153	1364.1
A8-09		21.6	0.4	0.282504	1.56396e-05	0.0410069	0.000526355	0.00156114	3.89232e-05	-9.03329	0.553106	1073.35	1677.88
A8-10		763	12	0.282282	1.28227e-05	0.0519438	0.000567877	0.00202062	4.17889e-05	-1.4997	0.454229	1406.1	1762.81
	c	793	15	0.282326	3.02745e-05	0.0423979	0.000114257	0.0015852	5.74474e-06	0.909129	1.07251	1327.57	1634.04
A8-11		21.4	0.7	0.282466	1.61503e-05	0.0313477	0.000213071	0.0012384	1.62131e-05	-10.383	0.571168	1118.2	1763.62
A8-12		109	2	0.282651	1.2902e-05	0.0327176	0.000141332	0.00133351	7.15459e-06	-1.97433	0.456377	858.265	1295.87
A8-13		21.6	0.8	0.282491	1.3332e-05	0.0236989	0.000235432	0.000916379	1.79459e-05	-9.50454	0.471495	1074.09	1708.06
A8-14		20.4	0.6	0.282513	1.47608e-05	0.0373095	0.000159813	0.00140977	1.17385e-05	-8.73845	0.522027	1057.25	1659.24
A8-15		20.6	0.6	0.282511	1.57746e-05	0.0283071	4.97515e-05	0.00111522	4.09541e-06	-8.8045	0.557881	1051.77	1663.56
A8-16		20.7	0.6	0.2825	1.47605e-05	0.0396045	0.000229537	0.00154707	1.76876e-05	-9.18161	0.522015	1078.93	1687.3
A8-17		21	0.4	0.282451	1.38369e-05	0.0307752	0.000295935	0.00117192	2.23887e-05	-10.9143	0.489354	1137.42	1797.32
A8-18		21.7	0.6	0.282514	1.41891e-05	0.0209919	4.3162e-05	0.000824275	3.79097e-06	-8.67806	0.50181	1038.87	1655.65
A8-19		51.7	1	0.282479	1.32566e-05	0.0226755	2.78957e-05	0.000888378	2.05447e-06	-9.27596	0.468863	1090.39	1716.79
A8-20		20.8	0.6	0.282517	1.62165e-05	0.0263284	0.000241111	0.00101151	1.67011e-05	-8.56579	0.573508	1039.46	1648.45
A8-21		20.2	0.4	0.282554	3.23392e-05	0.0166821	0.000209589	0.000580519	1.32318e-05	-7.27211	1.1437	977.11	1566.45
A8-22		30	0.6	0.282483	3.25959e-05	0.00289286	8.56677e-05	9.3695e-05	6.04891e-06	-9.56456	1.1528	1061.85	1719.17
A8-23		216	4	0.282598	3.9684e-05	0.0676819	0.000614628	0.00235828	4.28001e-05	-1.74436	1.40406	960.179	1362.22
A8-24		36.9	0.8	0.282512	3.83922e-05	0.0449155	0.000427774	0.00152264	2.90275e-05	-8.41901	1.35782	1061.14	1651.06
A8-25		20	0.4	0.282666	4.02777e-05	0.0144757	0.000101002	0.000565046	5.92039e-06	-3.30725	1.42445	820.652	1314.11
	c	32.5	0.6	0.282581	2.5033e-05	0.0125675	7.15369e-05	0.000477082	6.76655e-06	-6.05656	0.885335	936.805	1498.06
A8-26		20.7	0.5	0.282606	2.97523e-05	0.0299512	1.15536e-05	0.000992975	3.00644e-06	-5.44081	1.05221	914.721	1449.86
A8-27		63	1	0.282507	3.01414e-05	0.0533845	0.00033368	0.00184518	1.77341e-05	-8.07672	1.06607	1078.13	1648.82
A8-28		20	0.4	0.282456	6.16971e-05	0.077114	0.000369921	0.0027698	3.06901e-05	-10.7686	2.18197	1180.9	1787.27
	c	506	10	0.281948	2.9763e-05	0.0173083	3.99928e-05	0.00057356	1.05055e-06	-18.2149	1.05372	1812.84	2618.54
A8-29		480	10	0.282435	3.55837e-05	0.0284875	8.0864e-05	0.00101277	4.14126e-06	-1.6701	1.25972	1154.93	1558.38
A8-30		35.2	0.7	0.282538	2.91724e-05	0.00475854	1.0933e-05	0.00016086	6.62089e-07	-7.51984	1.03174	988.605	1593.22
A8-31		44	0.9	0.282498	2.79546e-05	0.0649421	0.000314461	0.00249685	2.04074e-05	-8.80082	0.988686	1110.38	1680.18
A8-32		41.5	0.9	0.282542	2.2531e-05	0.0128822	9.32312e-05	0.000473672	6.2811e-06	-7.23793	0.796864	990.685	1579.93
A10
A10-01		20.6	0.8	0.282443	1.71282e-05	0.0161401	0.000127002	0.000617451	9.81714e-06	-11.1977	0.605752	1132.31	1815.54
A10-02		20.1	0.6	0.282418	1.90185e-05	0.0213434	0.000102249	0.000838431	8.17077e-06	-12.0798	0.672604	1173.59	1871.31
A10-03		19.9	0.9	0.28244	1.95212e-05	0.0203703	6.78398e-05	0.000817498	5.99208e-06	-11.2888	0.690383	1141.76	1821.22
A10-04		21.6	0.8	0.282483	1.7791e-05	0.0179952	4.68544e-05	0.000714609	3.84606e-06	-9.7604	0.629191	1078.57	1724.37
A10-05		22.4	0.6	0.282483	3.2876e-05	0.016335	0.000257928	0.000958416	1.61672e-05	-9.76477	1.16269	1085.56	1724.54
A10-06		19	0.7	0.282448	1.62385e-05	0.0166922	0.000245363	0.000647645	1.85724e-05	-11.0298	0.574288	1126.6	1804.89
A10-08		31	1	0.282354	1.96119e-05	0.00970828	3.33974e-05	0.000393919	2.65906e-06	-14.1041	0.693605	1247.79	2007.3
A10-09		20.3	0.6	0.28248	1.74515e-05	0.0245605	8.53934e-05	0.000947985	5.71142e-06	-9.89906	0.617185	1090.59	1733.06
A10-10		20.3	0.5	0.282459	1.66197e-05	0.0199012	0.00020328	0.000778018	1.45311e-05	-10.6335	0.587768	1114.77	1779.71
A10-11		20.3	0.6	0.282501	1.78063e-05	0.0169961	5.05228e-05	0.000660051	3.82793e-06	-9.13472	0.629735	1052.44	1684.7
A10-12		20.6	0.9	0.282462	1.79691e-05	0.0226727	0.000379366	0.000879815	2.90521e-05	-10.5134	0.635492	1112.96	1772.05
A10-13		21.6	0.7	0.282467	1.85494e-05	0.0271954	9.63015e-05	0.00108547	7.02334e-06	-10.3491	0.656015	1112.39	1761.53
A10-14		20	0.5	0.282456	1.60957e-05	0.0274402	0.000204318	0.00108957	1.58597e-05	-10.7434	0.569237	1128.18	1786.53
A10-15		20.7	0.4	0.282493	1.81355e-05	0.0244604	0.000249864	0.000946268	1.82259e-05	-9.43335	0.641375	1072.09	1703.53
	c	30.3	0.6	0.282747	3.32876e-05	0.0215051	0.000234793	0.000819344	1.36327e-05	-0.235367	1.17727	712.115	1125.31
A10-16		70	1	0.282473	1.68822e-05	0.0134292	0.000264273	0.000491443	2.01053e-05	-9.05804	0.597117	1086.56	1716.86
A10-17		58	1	0.282461	1.52136e-05	0.031979	0.000490279	0.00128761	3.62527e-05	-9.79297	0.538085	1127.42	1754.11
A10-18		20.8	0.9	0.282457	1.76194e-05	0.0182358	0.000186754	0.000664611	1.08052e-05	-10.7032	0.623124	1114.26	1784.19
A10-20		21.3	0.9	0.28241	1.80672e-05	0.019093	8.99271e-05	0.000743352	7.12136e-06	-12.374	0.63896	1182.29	1889.99
A10-21		20.7	0.8	0.282624	3.64781e-05	0.0247455	5.41436e-05	0.000906158	3.2014e-06	-4.77997	1.29008	886.411	1407.82
	c	33	0.7	0.282471	3.4219e-05	0.0146663	8.74345e-05	0.000511	6.9001e-06	-9.94464	1.21022	1090.53	1745.34
A10-22		70	1	0.28254	2.90497e-05	0.0128729	0.000232244	0.000436346	1.58228e-05	-6.69801	1.02748	992.77	1567.09
A10-23		41.8	1	0.282631	2.89053e-05	0.0138503	6.76293e-05	0.000440086	3.29612e-06	-4.09548	1.02231	866.891	1380.28
A10-24		39.5	1	0.282537	3.02081e-05	0.0233207	9.92386e-05	0.00084846	5.74545e-06	-7.48354	1.06838	1008.1	1593.89
A10-25		273	6	0.282679	3.40459e-05	0.038793	0.000213712	0.00148147	1.64533e-05	2.44377	1.20473	822.098	1139.32
A10-26		123	3	0.282537	2.99467e-05	0.0214287	9.23955e-05	0.000821097	5.49908e-06	-5.67168	1.05933	1006.42	1541.72
A10-27		23	1	0.282515	3.40831e-05	0.0136067	2.97306e-05	0.000510236	1.76907e-06	-8.6309	1.20538	1028.65	1652.78
	c	277	6	0.282441	2.60355e-05	0.0184046	0.000147595	0.000710383	1.01344e-05	-5.74259	0.921286	1137.17	1662.46
A10-28		38.2	0.8	0.282482	3.10286e-05	0.0150491	7.22652e-05	0.000530821	5.18537e-06	-9.43753	1.09739	1075.6	1717.07
A10-29		46	1	0.282547	2.76673e-05	0.0344463	0.000301358	0.00124313	1.84369e-05	-6.96946	0.978531	1003.22	1565.98
A10-30		79	2	0.282668	2.08739e-05	0.0225276	0.000125278	0.00093051	7.0401e-06	-1.97908	0.738318	824.976	1273.51
A10-31		35.7	0.8	0.28265	2.179e-05	0.0875196	0.000333237	0.0032492	2.6156e-05	-3.61415	0.770645	906.788	1344.23
A10-32		106	2	0.282563	3.07591e-05	0.0912369	0.00215548	0.0032348	0.000150771	-5.28554	1.08802	1035.99	1503.59
A10-33		55	1	0.282213	1.74275e-05	0.0014972	5.92908e-05	5.00954e-05	4.52633e-06	-18.5701	0.616384	1429.24	2307.24
A10-34		61	1	0.282502	1.98192e-05	0.0226245	0.000209095	0.000829649	1.38143e-05	-8.24573	0.700983	1055.93	1658.44
A10-35		146	3	0.282551	2.74117e-05	0.0343914	9.89925e-05	0.00129788	7.02865e-06	-4.74027	0.969703	999.821	1499.79
E
E-01		127	2	0.282715	1.59527e-05	0.0918854	0.000629644	0.00327312	4.12245e-05	0.509509	0.564314	810.118	1151.85
E-02		129	2	0.282705	2.05159e-05	0.187059	0.00096272	0.00742421	8.54594e-05	-0.167195	0.72573	933.359	1194.02
E-03		128	2	0.282714	1.68235e-05	0.0768419	0.000217123	0.00284227	1.65842e-05	0.512284	0.595117	801.791	1151.75
	c	130	3	0.282795	3.43441e-05	0.0569924	0.000779291	0.00252566	5.39947e-05	3.40908	1.21489	675.285	966.919
E-04		128	2	0.282708	1.88433e-05	0.123318	0.000104293	0.0045116	7.78307e-06	0.167492	0.666565	849.918	1173.4
E-05		125	3	0.282719	1.59601e-05	0.0633235	0.00061205	0.00266017	4.51331e-05	0.727343	0.564574	789.403	1138.07
E-09		129	2	0.282678	1.35619e-05	0.0295844	0.000505391	0.00132267	4.24626e-05	-0.627325	0.47974	820.203	1224.67
E-11		127	2	0.282736	1.90759e-05	0.126225	0.00138553	0.00505536	9.59041e-05	1.11661	0.674795	819.179	1112.82
E-12		128	2	0.282702	1.32205e-05	0.0217227	0.000292521	0.00103644	3.21131e-05	0.266066	0.467664	779.266	1167.76
	c	127	3	0.282744	3.29074e-05	0.151053	0.00408825	0.00562712	0.00030213	1.3405	1.16407	820.968	1098.45
E-14		126	3	0.282699	1.96185e-05	0.18305	0.000957191	0.00731413	7.26059e-05	-0.387761	0.693988	941.087	1208.07
E-18		131	2	0.282713	1.59255e-05	0.117552	0.000429083	0.0042748	3.15502e-05	0.349333	0.563351	837	1161.86
E-19		129	2	0.282742	1.73446e-05	0.113494	0.00314714	0.00469775	0.00024658	1.36377	0.613551	800.955	1097.14
E-20		128	2	0.282641	1.41838e-05	0.0548751	0.00254617	0.00221224	0.000192181	-2.01756	0.501739	894.338	1313.01
E-21		122	3	0.282739	2.97555e-05	0.0608427	0.000356787	0.00252427	3.70531e-05	1.41703	1.05258	758.223	1094.11
Nattaung
C
C-01		71	1	0.282336	1.33079e-05	0.0124162	0.000220287	0.000432524	1.79806e-05	-13.8816	0.470697	1274.74	2023.61
	c	202	4	0.282433	2.83991e-05	0.0261775	0.000188205	0.00077895	1.06928e-05	-7.66337	1.00476	1150.87	1727.55
C-04	c	968	19	0.282507	3.01528e-05	0.0551762	9.16159e-05	0.00182033	1.00013e-05	10.8864	1.06862	1077.17	1138.65
C-06		71	1	0.282434	1.58569e-05	0.0348281	0.000384028	0.00128291	2.96263e-05	-10.4453	0.560853	1164.98	1805.79
	c	296	6	0.28244	2.68248e-05	0.0191156	0.000289237	0.000795848	1.44437e-05	-5.39554	0.949254	1141.54	1654.8
C-08		71.82	0.52	0.282434	1.53378e-05	0.0347467	0.000384755	0.00127969	2.96893e-05	-10.4518	0.542496	1165.14	1806.2
C-09		71	1	0.282337	2.73239e-05	0.0597702	0.000622504	0.00216725	3.78887e-05	-13.9128	0.966439	1332.93	2024.54
C-10		72	1	0.282445	2.81855e-05	0.0477246	0.000187039	0.00178504	1.2546e-05	-10.0649	0.996913	1164.42	1781.46
C-11		72	1	0.282333	1.43947e-05	0.0544729	0.000434755	0.00196276	2.94646e-05	-14.031	0.509137	1330.72	2032.12
C-13		1062	26	0.282005	1.56379e-05	0.0283924	0.000324854	0.00106102	2.15022e-05	-4.38685	0.554324	1757.28	2171.46
C-15		72	1	0.28239	2.30693e-05	0.0596242	0.000330192	0.00212605	2.20876e-05	-12.0527	0.815957	1255.71	1907.05
C-17		71	1	0.282384	1.40709e-05	0.064276	0.000560553	0.00242689	3.78196e-05	-12.2652	0.497686	1274.24	1920.32
C-18		72	1	0.282408	1.64318e-05	0.0632038	0.000996895	0.00222764	6.72457e-05	-11.4119	0.581187	1232.79	1866.48
C-19		71	1	0.282475	1.31905e-05	0.014524	0.000477997	0.000569985	3.31616e-05	-8.94628	0.466545	1085.81	1711.11
	c	73	2	0.282521	3.16412e-05	0.00818946	0.000223364	0.000343598	1.53328e-05	-7.31596	1.11914	1016.22	1607.74
C-20		72	1	0.282395	1.43411e-05	0.0679616	0.000510906	0.00246036	3.85545e-05	-11.8775	0.507243	1259.39	1895.8
C-21		683	14	0.282589	2.98107e-05	0.0151961	8.81803e-05	0.000599023	7.96245e-06	8.32558	1.05582	928.933	1080.29
C-22		1702	17	0.282017	3.63085e-05	0.028812	0.00023289	0.0010832	1.51795e-05	10.025	1.2889	1740.51	1763.41
C-23		2705	15	0.280918	4.31367e-05	0.0240903	7.12305e-05	0.000870431	6.26297e-06	-6.39777	1.53483	3229.52	3546.24
C-24		159	3	0.282347	2.18204e-05	0.00665606	1.25859e-05	0.000182083	1.04477e-06	-11.5679	0.771929	1251.03	1942.57
C-25		535	10	0.282467	2.40019e-05	0.0215536	0.000190406	0.000695135	1.29771e-05	0.750923	0.84981	1101.03	1447.06
C-26		73	2	0.282542	2.95316e-05	0.0308354	0.000243851	0.00110672	1.49462e-05	-6.61248	1.04453	1007.34	1562.8
C-27		73	2	0.282567	3.41752e-05	0.0234223	0.000184219	0.000876985	1.17711e-05	-5.72211	1.20877	966.385	1506.3
C-28		73	1	0.282462	2.56989e-05	0.0284692	3.65278e-05	0.00104232	2.66738e-06	-9.45057	0.908963	1118.53	1742.88
C-30		2409	18	0.281275	3.56746e-05	0.0137901	9.28311e-05	0.000550508	6.65654e-06	0.16409	1.26845	2724.87	2919.93
C-32		75	2	0.282578	2.34274e-05	0.0359865	0.00058411	0.00128024	4.13018e-05	-5.33817	0.828622	960.64	1481.77
C-33		608	11	0.282166	2.17852e-05	0.00741141	0.000140754	0.000264742	1.04357e-05	-8.14062	0.771451	1501.1	2063.5
SEDO
SEDO-01		46.5	0.9	0.282511	2.18367e-05	0.0519758	0.000363307	0.00155245	4.76544e-06	-8.25157	0.772316	1063.29	1647.63
SEDO-02		47	1	0.282548	4.08004e-05	0.0243044	0.000638246	0.000750861	2.46381e-05	-6.91231	1.44302	989.407	1563.28
SEDO-03		48.7	1	0.282556	3.04879e-05	0.033905	0.000648408	0.000954749	1.61278e-05	-6.59215	1.0783	983.219	1544.15
SEDO-05		47.5	1	0.282555	6.51179e-05	0.0778607	0.00388858	0.00264988	0.00015631	-6.70819	2.30308	1030.94	1549.99
SEDO-06		47	1	0.282457	2.61955e-05	0.0203547	0.000163268	0.000636551	1.29394e-06	-10.1458	0.926479	1113.74	1768.53
SEDO-07		55	1	0.282501	3.21253e-05	0.0590828	0.0015847	0.00206658	7.67155e-05	-8.45167	1.13622	1092.85	1666.49
SEDO-08		47	1	0.282563	3.3087e-05	0.0361062	0.000500584	0.00111778	1.20699e-05	-6.39832	1.17021	978.103	1530.49
SEDO-10	c	53	1	0.282397	2.84374e-05	0.0310599	0.000271641	0.000909074	5.85122e-06	-12.1295	1.00578	1204.88	1898.52
SEDO-11		49.1	1	0.282545	3.23794e-05	0.0500963	0.000485928	0.00156718	1.64052e-05	-6.98539	1.14519	1014.83	1569.21
SEDO-12		49	1	0.282547	3.80833e-05	0.0352165	0.000672544	0.00112719	4.18305e-05	-6.9301	1.34693	1001.24	1565.78
SEDO-14		50	1	0.282568	2.20156e-05	0.0365257	0.00106107	0.000660094	5.87695e-06	-6.13085	0.778649	958.908	1515.91
SEDO-15		47.9	1	0.282477	2.60469e-05	0.0231843	0.000157963	0.00181005	4.52517e-05	-9.45648	0.921224	1120.42	1724.98
SEDO-17	c	54	1	0.282547	2.78609e-05	0.0667184	0.00170494	0.000732053	9.58159e-06	-6.79899	0.985395	990.393	1561.36
SEDO-18		50	1	0.282578	3.18812e-05	0.0274101	0.000493206	0.000702576	6.28385e-06	-5.77785	1.12758	945.992	1493.45
SEDO-19		55	1	0.282525	2.60005e-05	0.0277902	9.68535e-05	0.00125681	1.22532e-05	-7.58648	0.919597	1035.85	1611.93
SEDO-20		49.4	1	0.282585	3.4225e-05	0.0499862	0.000641811	0.000792216	2.51686e-05	-5.55536	1.21047	938.799	1478.82
SEDO-13		58	1	0.282552	2.68647e-05	0.0301121	0.00110564	0.00107982	2.74499e-05	-6.56434	0.950171	993.076	1549.34
Mokpalin
G
G-01		93	3	0.28307	2.29757e-05	0.0185841	0.000230634	0.000771998	1.9775e-05	12.4839	0.81268	255.699	355.982
G-02		93	2	0.283022	1.41337e-05	0.0115521	2.48697e-05	0.000500819	2.42527e-06	10.7973	0.499925	321.549	464.547
	c	91	2	0.283051	2.34347e-05	0.0214345	2.99948e-05	0.000775149	1.80179e-06	11.8083	0.828914	282.767	399.483
G-03		89	2	0.283031	1.40623e-05	0.0111357	2.126e-05	0.000455034	1.42288e-06	11.1408	0.497402	307.642	442.446
G-04		89	2	0.283017	1.54594e-05	0.0146847	0.000116426	0.000593221	8.70009e-06	10.6206	0.546818	329.148	475.912
G-05		90	2	0.283032	1.34175e-05	0.020861	0.000153679	0.000844693	1.39537e-05	11.155	0.474594	309.318	441.525
G-06		89	2	0.282992	1.55889e-05	0.0130382	3.4392e-05	0.000576702	3.19391e-06	9.72735	0.551399	364.573	533.342
G-07		90	2	0.283022	1.69737e-05	0.0139641	8.82599e-06	0.000554768	6.24701e-07	10.8021	0.600381	321.687	464.237
G-08		92	2	0.283038	1.47577e-05	0.00554159	6.43172e-05	0.000269288	6.23209e-06	11.3883	0.521997	296.815	426.525
G-09		93	2	0.283039	1.48561e-05	0.0122389	0.00013848	0.000536161	1.14911e-05	11.4013	0.525479	297.748	425.684
G-10		92	2	0.283045	1.43015e-05	0.0109143	9.60459e-06	0.000469602	1.57905e-06	11.6309	0.505862	288.27	410.91
G-11		93	2	0.283014	1.6123e-05	0.0163955	0.000124537	0.000652495	9.22397e-06	10.5205	0.570289	333.508	482.343
G-12		93	2	0.282975	1.46255e-05	0.0159237	4.06076e-05	0.000635056	2.9453e-06	9.14524	0.517323	388.173	570.746
G-13		89	2	0.283021	1.47383e-05	0.0111015	4.24598e-05	0.000449891	3.2142e-06	10.7675	0.521313	322.423	466.466
G-14		94	2	0.282979	1.66344e-05	0.0164591	0.000109601	0.000651648	8.34328e-06	9.25987	0.588379	383.738	563.38
G-15		91	2	0.283008	1.68983e-05	0.0077553	8.98358e-06	0.000390537	5.25999e-07	10.3247	0.597714	339.593	494.944
G-16		89	2	0.28301	1.38298e-05	0.011541	6.7296e-05	0.000468694	5.34607e-06	10.369	0.489178	338.346	492.092
	c	88	2	0.283108	2.6273e-05	0.00536793	2.54747e-05	0.000230565	2.35418e-06	13.8459	0.929307	199.558	268.223
G-17		88	2	0.28303	1.44079e-05	0.0136743	9.78946e-05	0.000554849	7.82526e-06	11.0828	0.509626	310.52	446.177
G-18		91	2	0.28301	1.44344e-05	0.0082591	1.81101e-05	0.000401489	1.9216e-06	10.3976	0.510562	336.778	490.257
G-19		92	2	0.283037	1.49714e-05	0.012076	2.56202e-05	0.000504029	1.09428e-06	11.3366	0.529558	300.144	429.85
G-20		92	2	0.283018	1.62619e-05	0.0104543	3.0463e-05	0.000429833	2.63594e-06	10.6552	0.575204	326.751	473.688
G-21		88	2	0.283051	1.93541e-05	0.0185556	7.04386e-05	0.000668255	4.82804e-06	11.8098	0.68458	282.164	399.388
BUR27
BUR27-01		63	2	0.282907	1.82713e-05	0.0850307	0.00264235	0.00182236	4.69252e-05	6.08169	0.64624	499.896	745.935
BUR27-02		64	2	0.282958	2.73418e-05	0.198769	0.00817369	0.00399262	0.000160475	7.80119	0.967055	453.186	636.261
BUR27-03		65	2	0.282881	4.0815e-05	0.155598	0.00450602	0.00384993	0.000142063	5.12226	1.4436	568.735	808.765
BUR27-04		65	2	0.282905	2.15543e-05	0.0752813	0.00087473	0.00165933	2.08853e-05	6.0512	0.762358	500.914	749.437
BUR27-05		63	2	0.282975	2.49554e-05	0.16701	0.00174888	0.00350571	2.23055e-05	8.4163	0.88265	420.449	596.033
BUR27-06		65	4	0.282956	1.83887e-05	0.14948	0.00145374	0.00286333	3.22174e-05	7.82811	0.650394	440.573	635.369
BUR27-6C		62	2	0.282946	1.65376e-05	0.100786	0.00148028	0.00198354	1.97097e-05	7.41821	0.584917	445.881	659.42
BUR27-08		62	2	0.282917	1.98385e-05	0.175028	0.00207275	0.00331324	3.44813e-05	6.3408	0.701668	506.459	728.439
BUR27-09		65	2	0.282948	1.84276e-05	0.169046	0.00182201	0.00325383	2.20693e-05	7.5134	0.651771	458.177	655.543
BUR27-10		62	2	0.282962	1.87486e-05	0.186906	0.00103357	0.00348024	2.36215e-05	7.93573	0.66312	440.018	626.116
BUR27-12		64	2	0.28288	1.74296e-05	0.0913268	0.00114704	0.00187984	2.19153e-05	5.15268	0.616472	539.582	806.238
BUR2712C		66	4	0.282847	1.48508e-05	0.108833	0.00227132	0.00214639	4.71017e-05	4.02272	0.525263	591.464	880.103
BUR27-14		61	2	0.2831	3.3022e-05	0.460315	0.00424391	0.00785663	7.23658e-05	12.6127	1.16795	262.879	324.507
BUR27-15		63	2	0.28292	1.81088e-05	0.172925	0.00328871	0.00322957	5.31391e-05	6.48763	0.640491	499.988	719.799
BUR27-16		64	2	0.28295	1.91844e-05	0.129758	0.00109036	0.0023596	2.11864e-05	7.58297	0.678535	444.707	650.362
	c	63	4	0.283002	2.09024e-05	0.117951	0.00501501	0.00224131	8.3883e-05	9.42109	0.739299	366.211	531.537
BUR27-17		63	2	0.282913	1.87666e-05	0.159154	0.000970558	0.00288306	1.02556e-05	6.26219	0.663759	505.265	734.28
BUR27-18		63	2	0.282862	2.57649e-05	0.143329	0.00232806	0.0026987	4.37024e-05	4.46335	0.911281	578.527	849.54
BUR27-19		63	2	0.282905	2.14923e-05	0.189153	0.00133301	0.00338261	3.51674e-05	5.9355	0.760163	525.54	755.179
BUR27-20		64	2	0.282946	2.2587e-05	0.139766	0.00181802	0.00247715	3.45726e-05	7.46454	0.798883	450.899	657.956
Moulmein
BUR26
BUR26-01		69	4	0.282508	2.11367e-05	0.076846	0.000194755	0.00129968	6.65949e-06	-7.89219	0.747594	1061.02	1641.84
BUR26-03		69	4	0.28274	3.77057e-05	0.195088	0.00520169	0.00370037	0.000120741	0.218836	1.33363	781.256	1125.2
BUR26-05		73	4	0.282523	1.66873e-05	0.0273186	0.000410992	0.000464664	4.34022e-06	-7.24477	0.590227	1017.42	1604.06
BUR26-06		73	4	0.282568	2.18943e-05	0.0775113	0.00204695	0.00128236	2.74315e-05	-5.66253	0.774398	974.683	1503.28
BUR26-07		72	4	0.282525	1.66653e-05	0.0742129	0.0025158	0.00126289	3.6375e-05	-7.22144	0.589449	1035.76	1601.54
BUR26-08		70	4	0.282829	3.28007e-05	0.150756	0.00364898	0.00258674	6.34378e-05	3.42072	1.16015	626.445	921.631
BUR26-09		71	4	0.282538	1.77923e-05	0.0901403	0.000427877	0.00159894	4.13991e-06	-6.77824	0.629307	1025.75	1572.53
BUR26-10		72	4	0.282549	1.85878e-05	0.0544633	0.00178208	0.000951524	2.71777e-05	-6.36031	0.657444	993.643	1546.97
BUR26-11		71	4	0.282588	2.00155e-05	0.142583	0.00249441	0.00263552	5.87357e-05	-5.0871	0.707942	982.908	1464.76
BUR26-12		69	4	0.282517	1.40022e-05	0.0804176	0.00117198	0.00142068	2.27635e-05	-7.57721	0.49525	1051.59	1621.8
BUR26-13		70	4	0.282583	1.69887e-05	0.114093	0.00280447	0.00207273	4.63591e-05	-5.23322	0.600885	974.037	1473.47
BUR26-14		68	2	0.282499	1.81073e-05	0.0807896	0.0006489	0.00150014	7.09917e-06	-8.21631	0.640447	1078.55	1661.57
BUR26-15		71	4	0.282526	1.77615e-05	0.0655708	0.000233442	0.00124062	4.3833e-06	-7.21085	0.628217	1033.92	1600.12
BUR26-17		71	4	0.282507	1.75699e-05	0.0552608	0.000161907	0.00100131	3.46307e-06	-7.85919	0.621442	1053.56	1641.36
BUR26-19		69	4	0.282696	2.21101e-05	0.0780916	0.00150397	0.00133997	3.05786e-05	-1.24262	0.782025	795.043	1218.88
BUR26-20		72	4	0.282511	1.57545e-05	0.0406482	0.000191991	0.000699443	1.65777e-06	-7.67495	0.557232	1039.35	1630.54
Banmauk
BUR01
BUR01-01		102	4	0.283055	1.94407e-05	0.0740724	0.00014347	0.00138803	4.72582e-06	12.1727	0.687657	280.743	384.721
BUR01-02		100	4	0.283094	1.87071e-05	0.0543963	0.000943859	0.00101544	1.90193e-05	13.5226	0.661706	222.824	296.228
BUR01-03		109	6	0.283058	1.76725e-05	0.0738851	0.00107762	0.00136179	1.96334e-05	12.4095	0.625123	276.991	374.902
BUR01-04		106	4	0.283071	2.17804e-05	0.0786821	0.0013072	0.00149957	2.08124e-05	12.8027	0.770425	258.987	347.253
BUR01-05		102	4	0.283043	1.882e-05	0.093829	0.000458234	0.00179643	1.53711e-05	11.688	0.665701	302.675	415.908
BUR01-06		106	6	0.283062	2.47355e-05	0.0745665	0.00124297	0.00150405	2.73389e-05	12.4888	0.874955	271.827	367.469
BUR01-07		101	4	0.283055	1.75385e-05	0.0401731	0.00030567	0.000849165	5.54579e-06	12.157	0.620371	277.952	384.962
BUR01-08		102	4	0.283099	1.69745e-05	0.0615095	0.000734548	0.00124906	1.46538e-05	13.7247	0.600423	217.11	284.754
BUR01-09		104	4	0.283028	1.53406e-05	0.0625085	0.000239732	0.00126001	7.36385e-06	11.2658	0.542633	318.613	444.631
BUR01-10		111	6	0.283075	1.65376e-05	0.0618059	0.000619406	0.00127296	1.4209e-05	13.047	0.58498	252.435	335.405
BUR01-11		103	4	0.283075	1.66055e-05	0.0588163	0.000253265	0.00106242	3.5481e-06	12.911	0.587372	250.252	337.959
BUR01-12		102	4	0.283104	1.64093e-05	0.0496306	0.000528645	0.000921921	2.91281e-06	13.912	0.580432	208.566	272.68
BUR01-13		101	4	0.283054	1.51152e-05	0.0545849	0.00072505	0.00102115	1.14154e-05	12.113	0.534656	280.539	387.794
BUR01-14		102	4	0.283085	1.58538e-05	0.0775768	0.000677722	0.0013689	1.20524e-05	13.219	0.560782	238.07	317.335
	c	102	4	0.283113	1.78959e-05	0.0687273	0.000394246	0.00123787	6.73112e-06	14.2187	0.633017	197.025	252.912
BUR01-15		100	4	0.283026	1.55079e-05	0.0228002	7.19091e-05	0.000530644	1.94805e-06	11.1516	0.548544	315.584	448.891
BUR01-17		102	4	0.283025	1.84747e-05	0.0421438	0.000370834	0.000997755	7.71139e-06	11.1117	0.653489	321.595	453
BUR01-18		106	4	0.283083	1.6771e-05	0.0647586	0.00147441	0.00119248	2.46766e-05	13.2491	0.593232	239.644	318.503
BUR01-19		104	4	0.283053	1.45515e-05	0.0481504	6.4141e-05	0.000848126	6.10125e-07	12.164	0.514718	280.243	386.833
BUR01-20		104	4	0.28304	2.07105e-05	0.0686014	0.000452699	0.00115608	5.91381e-06	11.6892	0.732577	300.898	417.388
BUR04
BUR04-03		100	4	0.283145	2.66339e-05	0.190178	0.00379563	0.00365023	0.000131178	15.1464	0.942092	161.626	191.518
BUR04-06		415	18	0.282493	4.34709e-05	0.115041	0.00312627	0.00235164	8.43686e-05	-1.37304	1.53872	1112.74	1489.89
BUR04-08		418	20	0.282453	2.73532e-05	0.0958267	0.00360838	0.0018033	8.25347e-05	-2.58538	0.968213	1153.98	1569.04
BUR04-09		103	4	0.282977	2.49827e-05	0.05863	0.00302298	0.00103815	6.71023e-05	9.44459	0.883694	389.808	560.937
BUR04-11		429	18	0.282699	5.28278e-05	0.196382	0.00658326	0.004015	0.000106289	5.71938	1.86998	851.676	1050.1
BUR04-14		101	4	0.283108	1.97445e-05	0.159726	0.000899054	0.00270534	1.77745e-05	13.9071	0.698402	213.238	272.21
BUR04-15		101	4	0.282984	1.48277e-05	0.0480367	0.000257739	0.000966831	5.68207e-06	9.64324	0.524485	379.57	546.633
BUR04-16		102	4	0.282996	1.54155e-05	0.064953	0.00051588	0.00137217	1.06202e-05	10.0717	0.545278	366.07	519.862
BUR04-18		102	4	0.283026	2.89224e-05	0.0868006	0.00331148	0.00152612	4.98576e-05	11.1096	1.02305	324.82	453.122
BUR04-20		101	4	0.282998	2.0617e-05	0.0447482	0.000992642	0.000926396	2.27858e-05	10.166	0.729263	358.293	513.04
BUR05
BUR05-02		104	4	0.283045	1.48086e-05	0.0816079	0.00161792	0.00153968	3.38971e-05	11.8291	0.523814	297.23	408.382
BUR05-03		102	4	0.283077	2.06529e-05	0.059397	0.00202679	0.00113259	5.2584e-05	12.938	0.730537	248.577	335.443
BUR05-04		100	4	0.283062	3.3022e-05	0.086639	0.00378538	0.00194985	0.000127835	12.3117	1.16805	276.037	374.214
BUR05-05		101	4	0.283056	2.33617e-05	0.0589069	0.00167306	0.00112553	5.17905e-05	12.2028	0.826351	277.411	382.011
BUR05-06		98	4	0.283066	1.77212e-05	0.092592	0.000387845	0.00161743	8.15395e-06	12.4452	0.62683	267.266	364.071
BUR05-07		100	4	0.283106	2.41559e-05	0.0889701	0.00225837	0.00176899	7.09942e-05	13.8843	0.854442	210.457	272.913
BUR05-08		99	4	0.283096	1.89468e-05	0.0760082	0.00100966	0.00128942	1.49838e-05	13.548	0.670182	221.838	293.812
BUR05-09		101	4	0.28307	1.97485e-05	0.0868251	0.000772608	0.00148149	1.4068e-05	12.6415	0.698545	261.203	353.756
BUR05-10		100	4	0.283015	2.95696e-05	0.0611437	0.002238	0.00137844	6.93119e-05	10.692	1.04594	339.194	478.435
BUR05-11		99	4	0.283072	1.73491e-05	0.0843569	0.00047406	0.00147654	8.5443e-06	12.6724	0.613671	258.207	350.218
BUR05-12		101	4	0.283159	2.17444e-05	0.121958	0.000561278	0.00200331	1.15623e-05	15.7561	0.769142	134.4	152.951
BUR05-13		102	4	0.283077	2.20617e-05	0.0820734	0.000872314	0.00140375	1.45524e-05	12.947	0.780369	249.283	334.86
BUR05-16		102	4	0.28303	2.61507e-05	0.0854257	0.00100218	0.00144865	1.41933e-05	11.2771	0.925005	317.533	442.353
BUR05-17		103	4	0.283089	2.47166e-05	0.0811741	0.00158372	0.0013699	1.87557e-05	13.3788	0.874279	232.429	307.819
BUR05-18		102	4	0.28308	1.91389e-05	0.0507702	5.80957e-05	0.000872991	1.14792e-06	13.0724	0.676985	242.167	326.789
	c	101	4	0.283112	1.96474e-05	0.109574	0.00100731	0.00180285	1.40754e-05	14.1319	0.69497	201.211	257.729
BUR05-19		101	4	0.283074	1.66033e-05	0.0609478	0.000202644	0.00102507	2.14017e-06	12.8239	0.587293	251.897	342.017
BUR05-20		101	4	0.283054	1.78752e-05	0.0837117	0.00136977	0.00135652	2.60816e-05	12.0924	0.632284	282.998	389.114
BUR06
BUR06-01		99	4	0.283051	1.40209e-05	0.0384808	0.000385439	0.000782216	5.52962e-06	12.0071	0.495946	281.918	393.059
BUR06-02		100	4	0.28308	2.44724e-05	0.169024	0.00489934	0.00306277	8.41271e-05	12.8974	0.865637	256.597	336.484
BUR06-03		99	4	0.28312	2.39647e-05	0.109449	0.00397145	0.00208303	7.54934e-05	14.3398	0.847675	191.631	242.765
BUR06-04		101	4	0.28305	1.78334e-05	0.0598302	0.000284778	0.00116139	7.6093e-06	11.9786	0.630803	286.65	396.443
BUR06-05		97	4	0.283049	2.05182e-05	0.0757713	0.00136843	0.00143795	3.0109e-05	11.8367	0.725764	290.386	402.469
BUR06-06		100	4	0.283026	2.15697e-05	0.0671957	0.00032476	0.00135011	4.58988e-06	11.1011	0.762961	322.396	452.128
BUR06-07		99	4	0.283072	2.1031e-05	0.0984004	0.000347687	0.00185363	7.14316e-06	12.6535	0.743907	260.625	351.429
BUR06-08		101	4	0.283044	2.16552e-05	0.0935061	0.00217009	0.00173053	4.24501e-05	11.7077	0.765988	300.648	413.864
BUR06-09		98	4	0.283059	2.48107e-05	0.118927	0.0030242	0.00227741	5.7421e-05	12.1472	0.877598	282.78	383.245
BUR06-10		97	4	0.28305	1.62465e-05	0.052486	0.000564508	0.0010852	7.34313e-06	11.8913	0.574668	286.358	398.961
BUR06-11		97	4	0.283043	1.45527e-05	0.0754543	0.000565416	0.00150889	6.53074e-06	11.6235	0.514753	299.461	416.19
BUR06-12		97	4	0.283013	1.63723e-05	0.0801284	0.00208739	0.00161574	5.03875e-05	10.5653	0.579115	343.351	484.26
BUR06-13		98	4	0.283154	1.93641e-05	0.195705	0.00356769	0.00348877	8.07266e-05	15.4424	0.684942	146.837	170.861
BUR06-14		98	4	0.283057	1.42249e-05	0.067395	0.000677637	0.00142888	1.7819e-05	12.1392	0.503161	278.872	383.772
BUR06-15		97	4	0.283055	1.48862e-05	0.0503742	0.000558628	0.0010523	7.58413e-06	12.0741	0.526549	278.82	387.196
BUR06-16		99	4	0.283075	1.54811e-05	0.0494452	0.000525407	0.00107543	9.13392e-06	12.8262	0.547595	250.29	340.318
BUR06-17		99	4	0.283101	1.75783e-05	0.0988067	0.00118488	0.00194433	2.95877e-05	13.6921	0.621776	218.081	284.521
BUR06-18		96	4	0.283075	1.49006e-05	0.0529717	0.00113696	0.00111394	2.08217e-05	12.7369	0.527057	251.476	343.739
BUR06-19		98	4	0.283043	1.46725e-05	0.055567	0.000710587	0.00117173	1.7239e-05	11.646	0.518991	297.58	415.523
Wuntho
BUR11
BUR11-01		97	4	0.282955	1.7594e-05	0.0343967	0.000349556	0.000645046	4.37448e-06	8.55247	0.622332	417.194	613.621
BUR11-02		97	4	0.282995	2.72868e-05	0.0549849	0.00137596	0.00103163	2.62326e-05	9.93658	0.965182	364.818	524.691
BUR11-03		97	4	0.283032	2.56921e-05	0.0767559	0.000744198	0.00131769	1.96018e-06	11.2371	0.908773	314.108	441.056
BUR11-04		97	4	0.282972	1.64976e-05	0.0395598	0.000249921	0.000713616	5.93418e-07	9.14939	0.58355	393.971	575.282
BUR11-05		96	4	0.282989	2.15847e-05	0.0407254	0.000257492	0.000740353	1.96474e-06	9.73403	0.763484	369.982	536.945
BUR11-06		99	4	0.282997	1.74543e-05	0.0584182	0.000473214	0.00110587	1.18456e-05	10.0738	0.61739	361.53	517.413
BUR11-07		95	4	0.282972	1.48609e-05	0.0351733	0.000163479	0.000683052	1.5985e-06	9.11799	0.525654	393.266	575.758
BUR11-08		97	4	0.283016	1.94283e-05	0.0955527	0.0017208	0.00181523	4.21958e-05	10.6363	0.687212	341.772	479.691
BUR11-09		96	4	0.283016	1.95129e-05	0.0734621	0.000532344	0.0014822	1.95869e-05	10.639	0.690202	338.6	478.748
BUR11-10		96	4	0.282974	1.65104e-05	0.0375771	0.000152403	0.000738391	1.18761e-06	9.2151	0.584	390.685	570.289
BUR11-11		97	4	0.28294	1.6354e-05	0.0258657	0.000120544	0.000530011	1.66358e-06	8.0461	0.578467	436.311	646.135
BUR11-12		98	4	0.28298	1.57629e-05	0.0344091	0.000388546	0.000696817	3.26895e-06	9.46127	0.557561	382.262	556.018
BUR11-13		96	4	0.28301	1.44007e-05	0.056841	0.000555202	0.00110704	4.92819e-06	10.4495	0.509378	343.81	490.94
BUR11-14		98	4	0.282949	1.38694e-05	0.0303761	5.00691e-05	0.000666017	1.21032e-06	8.37867	0.490586	425.149	625.55
BUR11-15		98	4	0.282976	1.49503e-05	0.0300813	9.80923e-05	0.000641861	7.74077e-07	9.33459	0.528817	386.893	564.159
BUR11-16		98	4	0.282998	1.66921e-05	0.0501074	0.000508338	0.00103541	1.34402e-05	10.0784	0.590429	359.996	516.35
BUR11-17		96	4	0.282995	1.24543e-05	0.0335608	8.48577e-05	0.00071169	9.35927e-07	9.95574	0.44053	360.927	522.696
BUR11-18		100	4	0.283037	1.89604e-05	0.103732	0.00190371	0.00198299	3.50596e-05	11.4514	0.670666	311.774	429.581
BUR11-19		98	4	0.282956	1.74992e-05	0.0367633	0.000203594	0.000718775	3.96329e-06	8.61075	0.618977	416.352	610.647
BUR11-20		97	4	0.282983	1.57244e-05	0.0339962	0.000195435	0.000676329	2.40271e-06	9.54199	0.5562	378.032	550.06
BUR13
BUR13-01		101	4	0.283021	1.89866e-05	0.0573847	0.000311591	0.00102071	9.6733e-06	10.9526	0.671593	327.278	462.459
BUR13-03		99	4	0.283156	3.43831e-05	0.0770438	0.00140316	0.001793	1.9477e-05	15.6519	1.21619	136.789	158.118
BUR13-04		98	4	0.283088	2.04391e-05	0.0590073	0.00118975	0.00106772	1.98965e-05	13.2577	0.722969	231.975	311.744
BUR13-05		98	4	0.283018	2.50251e-05	0.0409125	0.000811532	0.000842045	3.42125e-05	10.8037	0.885181	329.595	469.72
BUR13-06		99	4	0.282973	1.81207e-05	0.0437356	0.000659879	0.000845729	1.23753e-05	9.24062	0.640962	393.076	570.96
BUR13-07		98	4	0.283012	1.98629e-05	0.0535114	0.000339061	0.000987346	2.60568e-06	10.5879	0.702585	339.171	483.593
BUR13-08		99	4	0.282963	1.57867e-05	0.0310203	0.000134951	0.000633865	1.54244e-06	8.89075	0.558406	405.355	593.44
	c	100	4	0.282952	2.13258e-05	0.0410654	0.00092677	0.00089215	1.39772e-05	8.50967	0.754336	423.582	618.671
BUR13-09		97	4	0.282983	1.53358e-05	0.0666978	0.000432691	0.00129784	1.18946e-05	9.50531	0.542454	384.214	552.397
BUR13-10		97	4	0.283004	1.80836e-05	0.050254	0.00119918	0.00101214	1.66532e-05	10.2686	0.639646	351.322	503.35
BUR13-11		95	4	0.283049	1.63146e-05	0.0866278	0.00172034	0.00169877	4.27732e-05	11.7641	0.577071	293.028	405.593
BUR13-12		96	4	0.282975	1.823e-05	0.0374613	0.000250133	0.000790221	1.20097e-05	9.2365	0.644823	390.235	568.912
BUR13-13		93	4	0.283038	1.84521e-05	0.0730882	0.000845188	0.00143025	2.13711e-05	11.3568	0.652677	306.468	430.26
BUR13-14		97	4	0.283006	1.75027e-05	0.04937	0.00074662	0.000993767	1.10855e-05	10.3255	0.6191	348.91	499.694
BUR13-16		95	4	0.283033	1.52782e-05	0.0299407	0.000319038	0.000648035	3.9389e-06	11.2786	0.540413	306.892	436.854
BUR13-17		97	6	0.283018	1.85166e-05	0.0587727	0.000829353	0.00122552	1.84234e-05	10.737	0.654964	333.819	473.225
BUR13-18		98	4	0.283057	2.29003e-05	0.0641028	0.000588866	0.001296	1.33215e-05	12.1488	0.810026	277.836	383.156
BUR13-19		98	4	0.283046	1.83389e-05	0.0851421	0.000675285	0.00167571	1.746e-05	11.7482	0.648679	296.125	408.941
BUR13-20		100	4	0.28302	1.80712e-05	0.0426655	0.000795558	0.000786919	1.39178e-05	10.9126	0.639215	326.616	464.263
BUR22
BUR22-01		32.7	1.6	0.283058	2.38474e-05	0.176028	0.00358547	0.00309788	6.23631e-05	10.7665	0.843403	290.461	421.569
BUR22-02		32.4	1.8	0.283072	3.49767e-05	0.143989	0.0061466	0.00283279	0.000162503	11.2666	1.23701	267.101	389.139
BUR22-03		32.1	1.6	0.282988	1.93648e-05	0.0963752	0.000309054	0.00163337	7.45919e-06	8.29104	0.684868	381.043	580.369
BUR22-05		31.8	1.6	0.283189	2.77357e-05	0.167923	0.0017776	0.00290667	3.42342e-05	15.3714	0.980918	92.5161	123.895
BUR22-06		32.8	1.8	0.283008	2.37784e-05	0.115759	0.000878088	0.00191567	1.82505e-05	9.02677	0.840965	354	533.604
BUR22-09		32.9	1.6	0.283072	2.35345e-05	0.138318	0.00117934	0.00229786	1.29684e-05	11.2919	0.832339	263.004	387.911
BUR22-10		33.8	1.8	0.283136	2.62857e-05	0.168835	0.00325741	0.00278072	4.57351e-05	13.5363	0.929643	171.846	243.933
BUR22-11		33.3	2	0.283112	2.94487e-05	0.0887925	0.000796411	0.00151101	1.72178e-05	12.7203	1.04151	200.054	296.181
BUR22-12		32.7	1.8	0.282991	2.41604e-05	0.0896326	0.00128173	0.0015742	4.03224e-05	8.4383	0.854474	374.983	571.37
BUR22-13		32.7	2	0.282997	2.7052e-05	0.0865455	0.00087892	0.00144159	1.52619e-05	8.6496	0.956741	365.16	557.795
BUR22-14		33.4	2	0.283065	2.82253e-05	0.13358	0.00128073	0.00221014	1.73927e-05	11.0409	0.998236	273.323	404.46
BUR22-15		33	2	0.283128	2.81106e-05	0.156647	0.00218531	0.00258979	3.36507e-05	13.2522	0.994181	182.399	261.634
BUR22-16		33.7	1.8	0.283049	2.89374e-05	0.104655	0.00359539	0.00182755	9.57491e-05	10.5059	1.02342	293.116	439.149
BUR22-17		33.3	1.6	0.283077	2.95053e-05	0.169083	0.0030385	0.002828	7.95213e-05	11.463	1.04351	259.518	377.192
BUR22-18		32	2	0.282987	2.35012e-05	0.0778307	0.000435813	0.00127883	8.30381e-06	8.2871	0.831159	377.795	580.562
BUR22-19		35.9	1.6	0.282997	1.96733e-05	0.066132	0.00070097	0.00106997	7.47033e-06	8.72101	0.695784	361.722	555.687
BUR22-20		33	1.8	0.282964	2.21385e-05	0.0822573	0.001309	0.00134316	1.69563e-05	7.47353	0.782967	412.253	633.597
Pinlebu
AM-3
AM-3-01		13.7	0.4	0.282991	2.47242e-05	0.0302403	5.40964e-05	0.00130715	4.85058e-06	8.0381	0.874379	372.423	582.396
AM-3-02		13.9	0.3	0.283077	2.86712e-05	0.0382577	0.000131286	0.00169601	9.49161e-06	11.0594	1.01396	252.271	387.968
	c	14.2	0.4	0.28303	3.05445e-05	0.035193	0.000747716	0.00152036	6.39206e-05	9.42125	1.08021	318.055	493.44
AM-3-03		13.5	0.3	0.283007	3.90334e-05	0.0217467	5.13985e-05	0.00091054	2.74937e-06	8.61172	1.38043	345.62	545.537
AM-3-04		13.8	0.3	0.283083	3.61878e-05	0.0458941	0.000428276	0.00200539	3.29192e-05	11.2707	1.27979	245.546	374.352
AM-3-05		13.8	0.3	0.282999	3.82465e-05	0.0321496	0.000220457	0.00137748	1.47164e-05	8.31867	1.3526	361.704	564.357
AM-3-06		13.9	0.3	0.282984	3.68412e-05	0.0255332	0.000173127	0.00106132	1.16951e-05	7.78562	1.3029	380.239	598.637
AM-3-07		13.7	0.3	0.282983	4.23059e-05	0.0523024	0.000250904	0.00219979	2.24724e-05	7.7576	1.49616	392.892	600.373
AM-3-08		13.8	0.3	0.283061	3.95632e-05	0.0361467	0.000215225	0.00160027	1.50167e-05	10.5017	1.39916	274.491	423.889
AM-3-09		13.5	0.3	0.283022	3.8996e-05	0.0332907	0.000286349	0.00144331	2.10712e-05	9.11734	1.3791	329.802	512.994
AM-3-10		13.6	0.3	0.283039	3.74116e-05	0.0452099	5.31864e-05	0.00194846	7.82024e-06	9.72535	1.32307	309.06	473.856
	c	13.8	0.3	0.283032	3.3361e-05	0.0312064	0.000158377	0.00136554	1.07121e-05	9.49643	1.17982	313.73	488.608
AM-3-11		13.1	0.3	0.283098	3.8352e-05	0.0266764	0.000169062	0.00114677	1.10945e-05	11.8201	1.35633	217.97	338.962
AM-3-12		13.3	0.3	0.28298	3.31732e-05	0.0436756	0.000495739	0.00186946	3.57968e-05	7.64562	1.17318	394.084	607.588
AM-3-13		13.7	0.3	0.283107	3.05225e-05	0.0156723	7.13489e-05	0.000721443	4.56275e-06	12.1529	1.07944	202.341	317.511
	c	14.1	0.3	0.283138	4.05132e-05	0.0245377	0.0001143	0.00112412	1.02956e-05	13.2472	1.43276	160.064	246.916
AM-3-14		13.3	0.3	0.282976	4.32258e-05	0.0205657	5.22526e-05	0.000897433	3.44629e-06	7.4893	1.52869	390.523	617.687
AM-3-15		13.4	0.3	0.283102	2.97757e-05	0.0315292	4.43428e-05	0.00143051	2.86383e-06	11.9602	1.05302	213.82	329.926
	c	13.7	0.3	0.28303	3.38202e-05	0.0514984	0.000138445	0.00223344	7.50752e-06	9.40376	1.19606	324.769	494.537
AM-3-16		13.4	0.3	0.283037	2.82991e-05	0.0429073	0.000178402	0.00186411	1.32267e-05	9.66225	1.0008	310.98	477.92
AM-3-17		13.6	0.3	0.282958	3.19449e-05	0.027312	0.000120923	0.00119439	1.24918e-05	6.87353	1.12974	418.398	657.224
AM-3-18		13.3	0.3	0.283044	3.14847e-05	0.0258436	6.01554e-05	0.00112101	4.18034e-06	9.91886	1.11346	294.702	461.43
AM-3-19		13.1	0.3	0.28311	2.83858e-05	0.0232103	0.000107145	0.000970126	6.17997e-06	12.2262	1.00387	200.639	312.782
AM-3-20		13.6	0.3	0.283021	3.1287e-05	0.0350696	0.000118794	0.00156096	5.44562e-06	9.10453	1.10647	331.332	513.813
c = core
italic = inherited grain
Spot		Inferred age (Ma ± 1s)		176Hf/177Hf	± 2s	176Yb/177Hf	± 2s	176Lu/177Hf	± 2s	eHf(T)	± 1s	TDM	TDMC (Ma)
Katha
BUR33		(detrital zircons)
BUR33-02		164	5	0.283045	2.91534e-05	0.0419751	0.000276762	0.000898155	1.58149e-06	13.1775	0.515679	291.379	368.144
BUR33-03		97	2	0.282958	3.23355e-05	0.106445	0.000484028	0.00241786	5.16811e-06	8.54948	0.571881	433.045	613.737
BUR33-05		157	3	0.283027	4.7916e-05	0.108756	0.00170427	0.00300927	8.76342e-05	12.1706	0.847546	335.828	427.464
BUR33-06		98	2	0.283054	4.51737e-05	0.0691945	0.00116115	0.001704	4.74486e-05	12.0203	0.798937	285.11	391.427
BUR33-07		98	2	0.283016	3.48617e-05	0.140327	0.000988694	0.00278368	2.49544e-05	10.6011	0.61656	350.748	482.7
BUR33-08		99	2	0.283086	3.7531e-05	0.0714487	0.00088564	0.00150259	1.55487e-05	13.194	0.663771	237.01	316.617
BUR33-09		97	2	0.282866	5.38332e-05	0.070059	0.000947118	0.00173355	4.20458e-05	5.32477	0.952087	558.747	820.533
BUR33-10		252	5	0.282329	4.42317e-05	0.0999661	0.00254564	0.00231718	5.54364e-05	-10.5387	0.782543	1350.68	1946.18
BUR33-11		95	2	0.283076	5.82585e-05	0.129839	0.00424188	0.00271946	0.000127777	12.6727	1.03035	260.322	347.086
BUR33-12		123	3	0.28302	3.48504e-05	0.0668196	0.00102022	0.00150454	1.95497e-05	11.3437	0.616395	333.131	454.321
BUR33-13		99	2	0.283001	2.61779e-05	0.0352252	0.000570072	0.000786473	1.48636e-05	10.2198	0.46298	353.466	508.034
BUR33-14		162	4	0.283136	4.00599e-05	0.12335	0.000331284	0.00273791	4.27574e-06	16.1488	0.708594	170.635	175.16
BUR33-17		100	2	0.283071	3.94939e-05	0.162847	0.000563421	0.0030763	2.09143e-05	12.5721	0.698488	270.534	357.432
BUR33-18		102	2	0.283008	4.21628e-05	0.0953853	0.000762271	0.00222409	2.13489e-05	10.4281	0.745694	357.456	496.93
BUR33-19		100	2	0.283032	3.01729e-05	0.0553653	0.000322476	0.00119461	1.22325e-05	11.3231	0.533638	312.486	437.848
BUR33-20		128	3	0.283034	3.35625e-05	0.0502394	0.000337124	0.00118886	6.50907e-06	11.9792	0.593623	309.937	417.321
BUR33-21		102	2	0.283092	3.15966e-05	0.0864013	0.00193674	0.00177738	4.44019e-05	13.4274	0.558819	231.007	303.906
BUR33-22		393	8	0.282923	4.11098e-05	0.13062	0.000854877	0.00265451	1.91867e-05	13.3174	0.727536	487.299	537.05
BUR33-23		104	2	0.283125	3.54303e-05	0.10545	0.000930734	0.00212362	1.62137e-05	14.6357	0.626624	183.711	227.575
BUR33-25		361	7	0.282422	5.29147e-05	0.0542851	0.0014623	0.00135303	4.70721e-05	-4.75507	0.936387	1183.53	1663.24
BUR33-26		164	5	0.283149	2.84355e-05	0.118033	0.00365268	0.00234259	5.64201e-05	16.6989	0.50298	149.228	141.238
BUR33-27		112	2	0.283022	2.65121e-05	0.0851804	0.00144215	0.00189945	2.42129e-05	11.1459	0.468905	334.146	458.516
BUR33-28		450	10	0.282538	2.60669e-05	0.0411586	0.000308736	0.00094624	5.10795e-06	1.36037	0.461374	1008.23	1343.5
BUR33-29		99	2	0.283031	2.27705e-05	0.0486299	0.000202308	0.00103575	8.33655e-06	11.2803	0.402718	312.449	439.828
BUR33-30		97	2	0.282999	2.49751e-05	0.0656794	0.000381417	0.00141476	4.13395e-06	10.0768	0.441706	361.884	515.668
BUR33-32		127	3	0.28301	2.26692e-05	0.0254243	0.000378134	0.000670862	8.95954e-06	11.15	0.40095	339.659	469.883
BUR33-35		97	2	0.282974	2.96651e-05	0.0424482	0.000359358	0.00106595	1.26402e-05	9.21411	0.524653	394.16	571.112
BUR33-36		99	2	0.283099	5.16595e-05	0.112828	0.00142461	0.00282113	3.09719e-05	13.5531	0.913646	226.901	293.469
BUR33-37		121	3	0.282989	2.71007e-05	0.037005	0.000242698	0.00084494	4.28619e-06	10.2677	0.479324	370.828	521.954
BUR33-38		360	7	0.282395	2.80903e-05	0.0375841	0.000443542	0.000910552	1.36524e-05	-5.6331	0.497089	1207.72	1718.14
BUR33-39		102	2	0.283066	2.51333e-05	0.0716125	0.00366485	0.00144462	6.31331e-05	12.5461	0.444509	265.793	360.677
BUR33-42		100	2	0.283023	5.53809e-05	0.177748	0.00440195	0.00408929	0.000130853	10.802	0.979464	353.225	471.297
BUR33-43		104	2	0.28303	4.72193e-05	0.109337	0.00141155	0.00258248	5.30207e-05	11.2485	0.835126	327.244	445.713
BUR33-44		102	2	0.282929	4.61841e-05	0.0368025	0.000576506	0.000979433	2.41329e-05	7.70872	0.816814	458.192	671.614
BUR33-45		101	2	0.282998	2.5656e-05	0.0732086	0.000783194	0.00152101	1.92302e-05	10.1176	0.453753	364.405	516.134
BUR33-46		383	8	0.282849	2.41298e-05	0.073146	0.000894113	0.00183861	1.38319e-05	10.7026	0.427025	583.785	696.718
BUR33-47		119	3	0.283166	4.84181e-05	0.13241	0.00145794	0.00344799	2.97056e-05	16.2741	0.856357	128.738	133.546
BUR33-48		123	3	0.28287	5.71294e-05	0.0631555	0.00167843	0.00157653	5.13529e-05	6.03857	1.01044	549.894	794.785
BUR33-50		160	6	0.283094	3.58812e-05	0.0713462	0.000334849	0.00168841	1.90104e-06	14.7344	0.634677	226.789	264.784
BUR33-51		101	2	0.283021	2.81391e-05	0.0506631	0.000405457	0.00106532	5.07237e-06	10.9408	0.497668	328.024	463.218
BUR33-52		103	2	0.282999	5.82563e-05	0.142565	0.0027959	0.00337207	9.97354e-05	10.0678	1.03033	382.12	520.821
BUR33-53		124	3	0.282936	3.38982e-05	0.0461967	0.00104514	0.00105481	3.42478e-05	8.43072	0.599554	448.713	642.227
BUR33-54		931	19	0.282528	4.52944e-05	0.129341	0.0030162	0.00307315	9.91425e-05	10.0803	0.802552	1083.32	1160.95
BUR33-57		168	5	0.283149	5.01254e-05	0.0752666	0.00179849	0.00172903	3.44014e-05	16.8267	0.886648	147.652	136.112
BUR33-58		271	6	0.282885	2.88975e-05	0.0731231	0.000773242	0.00153956	1.37391e-05	9.6798	0.511272	527.829	675.567
BUR33-59		198	4	0.283033	2.69912e-05	0.0426874	0.000638116	0.00108359	1.28065e-05	13.4276	0.477468	311.157	378.454
BUR33-60		122	3	0.282865	3.30815e-05	0.172112	0.00346573	0.00333654	5.74877e-05	5.68501	0.585106	585.491	816.515
BUR33-61		370	7	0.282602	2.63561e-05	0.0643042	0.00045538	0.0014856	1.38135e-05	1.77591	0.46641	931.592	1255.94
BUR33-62		367	7	0.282843	2.89335e-05	0.0649358	0.00165392	0.00136786	2.95877e-05	10.2558	0.512019	585.583	712.924
BUR33-63		192	3	0.282902	4.03041e-05	0.145877	0.0023414	0.0028119	4.16988e-05	8.47716	0.712961	520.493	691.592
BUR33-64		120	2	0.28299	3.5062e-05	0.0710368	0.00256488	0.00176074	8.69807e-05	10.1929	0.620133	379.275	525.969
BUR33-65		222	4	0.282967	3.77687e-05	0.166543	0.000684864	0.00306724	2.12436e-05	11.3413	0.668156	426.708	531.099
BUR33-66		101	2	0.282955	2.60871e-05	0.0600931	0.00102642	0.0012219	2.13867e-05	8.59566	0.461376	423.824	613.907
BUR33-67		100	2	0.283019	2.52196e-05	0.0685245	0.000439173	0.00129206	5.26791e-06	10.8498	0.446034	332.241	468.29
BUR33-68		191	4	0.283041	2.46741e-05	0.0546902	0.000490788	0.00124332	8.22545e-06	13.5682	0.436472	299.932	363.973
BUR33-69		369	6	0.282648	2.84005e-05	0.0644772	0.00177471	0.00136168	3.13599e-05	3.4145	0.502589	863.031	1150.97
BUR33-70		374	7	0.282782	4.46592e-05	0.110517	0.0026797	0.00255251	9.27875e-05	7.93901	0.790318	695.389	866.351
BUR33-71		355	6	0.282691	2.93933e-05	0.03997	0.000317906	0.00085402	4.80341e-06	4.74683	0.520141	791.537	1055.44
BUR33-72		100	2	0.282976	3.12122e-05	0.0527774	0.000667265	0.00106175	2.40619e-05	9.34812	0.552018	391.302	564.819
BUR33-73		359	7	0.282535	3.03847e-05	0.0498833	0.000477055	0.00103285	8.79765e-06	-0.718567	0.537689	1014.67	1406.04
BUR33-74		117	2	0.283066	3.70145e-05	0.0940129	0.00145792	0.00196317	3.45924e-05	12.8109	0.654661	270.01	355.258
BUR33-75		95	2	0.282997	4.30349e-05	0.0976845	0.00198692	0.00240977	5.42575e-05	9.89528	0.761106	375.069	525.759
BUR33-76		115	2	0.283126	3.00448e-05	0.0569313	0.000778305	0.00116332	1.56339e-05	14.9427	0.531388	178.68	216.335
BUR33-77		358	7	0.282796	3.05315e-05	0.0380744	0.000348752	0.000788818	6.839e-06	8.55511	0.540287	642.152	814.723
BUR33-79		311	6	0.282802	3.56629e-05	0.121203	0.00353881	0.00238576	6.40615e-05	7.4089	0.631026	662.291	851.663
BUR33-81		99	2	0.282956	3.47887e-05	0.0609445	0.00139726	0.0013164	5.06205e-05	8.59062	0.615271	423.138	612.685
BUR33-82		103	2	0.283089	3.38749e-05	0.056662	0.00250091	0.00105261	4.02011e-05	13.4191	0.599115	229.702	305.223
BUR33-83		120	2	0.283094	3.81155e-05	0.0865032	0.000786638	0.00230951	5.29117e-05	13.8438	0.67414	230.908	291.057
BUR33-84		102	2	0.283028	2.66116e-05	0.114576	0.00150422	0.00202	2.11861e-05	11.1578	0.470654	325.843	450.011
BUR33-85		119	2	0.28299	2.99942e-05	0.0748543	0.00223823	0.00171306	7.63858e-05	10.1755	0.530498	378.794	526.312
BUR33-87		99	2	0.283031	2.74591e-05	0.0755724	0.00104289	0.00133746	1.60085e-05	11.2431	0.48564	315.694	442.216
BUR33-88		102	2	0.283082	3.32515e-05	0.109318	0.00525087	0.00195439	8.41549e-05	13.0739	0.588087	246.258	326.683
BUR33-89		374	7	0.282825	3.64679e-05	0.154216	0.00210045	0.00302916	8.82259e-05	9.36975	0.645359	639.254	774.951
BUR33-90		393	7	0.28279	3.44272e-05	0.100279	0.00306572	0.00208422	3.94443e-05	8.75964	0.609272	673.697	828.631
BUR33-91		362	8	0.282571	2.62353e-05	0.062367	0.00124565	0.00132314	2.1059e-05	0.552634	0.464264	971.392	1327.57
BUR33-92		99	2	0.28308	3.88e-05	0.139863	0.00349505	0.00269424	0.000106026	12.8843	0.686214	254.687	336.561
BUR33-93		367	7	0.282805	3.44689e-05	0.113039	0.00144568	0.00216986	2.41344e-05	8.70331	0.609974	654.512	812.155
BUR33-94		97	2	0.282956	4.07469e-05	0.05691	0.000794569	0.00112263	3.11158e-05	8.58137	0.720644	420.119	611.746
BUR33-95		112	3	0.282944	3.51404e-05	0.0511226	0.000736851	0.00115428	3.11147e-05	8.44728	0.621509	438.639	631.913
BUR33-97		516	10	0.282175	3.00436e-05	0.0434296	0.000567449	0.000803426	1.15849e-05	-10.0337	0.531838	1510.03	2113.1
BUR33-98		98	2	0.282971	3.4647e-05	0.0563615	0.000563404	0.0011555	7.31626e-06	9.11027	0.612764	399.919	578.55
BUR33-101		334	6	0.282828	2.9829e-05	0.0676471	0.000716143	0.00123545	1.62764e-05	9.05488	0.527827	604.888	764.234
BUR33-102		190	4	0.282993	3.20153e-05	0.0693652	0.000614577	0.00150236	1.12782e-05	11.7929	0.566333	372.222	477.332
BUR33-103		356	7	0.282581	2.71591e-05	0.0221036	0.000138261	0.000521509	2.09753e-06	0.942508	0.480606	938.143	1298.34
BUR33-104		165	5	0.283064	3.56118e-05	0.0974771	0.00162439	0.00208233	2.34001e-05	13.709	0.629919	274.343	334.706
BUR33-106		433	8	0.282472	3.11063e-05	0.0626184	0.000223905	0.00118936	1.15899e-05	-1.43324	0.55055	1108.77	1507.61
BUR33-107		98	2	0.283027	3.22194e-05	0.0870622	0.00037447	0.00149888	5.37929e-06	11.0597	0.569829	323.267	453.241
BUR33-108		2150	16	0.281779	3.44287e-05	0.0617962	0.00149463	0.00123474	3.52727e-05	11.2355	0.611713	2079.13	2037.43
λ Lu-Hf = 1.86 × 10-11 year-1
eHf(T) = [(176Hf/177Hf)SampleT /(176Hf/177Hf)CHURT - 1] x 104
eHf(T) = {[((176Hf/177Hf)Sample0 - (176Lu/177Hf)Sample0 x (eλT - 1))/((176Hf/177Hf)CHUR0 - (176Lu/177Hf)CHUR0 x (eλT - 1))] -1} x 104
TDM = 1/λ x ln {1 + [((176Hf/177Hf)Sample0 - (176Hf/177Hf)DM0)/((176Lu/177Hf)Sample0 - (176Lu/177Hf)DM0)]}
TDMC = TDM – (TDM – t) x [(fCC-fS)/(fCC-fDM)]
fLu/Hf = [(176Lu/177Hf)Source/(176Lu/177Hf)CHUR, 0 ] – 1
(176Lu/177Hf)CHUR, 0 = 0.0332 ± 2
(176Hf/177Hf)CHUR, 0 = 0.282772 ± 29
(176Lu/177Hf)DM = 0.0384
(176Hf/177Hf)DM = 0.28325
(176Lu/177Hf)mean crust = 0.015
fCC = (0.015/0.0332)-1 = -0.5482
fDM = (0.0384/0.0332)-1 = 0.1566

## Sheet: Table A.3 Sr-Nd data
Supplementary Table A.3 Whole rock Sr-Nd isotopic data of analyzed samples from batholiths in Myanmar
Sample	Rb (ppm)	Sr (ppm)	87Rb/86Sr	(87Sr/86Sr)m	ISr(T)	Sm (ppm)	Nd (ppm)	147Sm/144Nd	(143Nd/144Nd)m	eNd(T)	TDM (Ga)
D-2	138	670	0.6	0.708171	0.70807	7.03	42.45	0.1001	0.512198	-8.4	1.28
BelinA	348	69	14.604	0.722833	0.718114	4.24	22.61	0.1134	0.512223	-7.6	1.41
MEC	356	19.6	52.594	0.73756	0.713888	2.02	9.02	0.1354	0.512231	-7.6	1.78
K2	136	351	1.122	0.716365	0.714995	9.34	67.06	0.0842	0.512105	-8.6	1.23
K1	325	378	2.49	0.711117	0.709872	9.43	53.15	0.1073	0.512209	-7.8	1.35
A8	129	765	0.5	0.707188	0.70709	4.44	24.97	0.1075	0.512292	-6.5	1.23
A10	181	636	0.8	0.708155	0.70799	4.67	27.1	0.1042	0.512267	-7	1.23
A12	149	423	1	0.708898	0.708684	3.82	20.87	0.1107	0.512142	-9.5	1.49
E	31	250	0.4	0.710399	0.709933	4.46	19.44	0.1287	0.51233	-5.1	1.66
SEDO	438	184	6.893	0.714058	0.710749	14	78.63	0.1076	0.512227	-7.5	1.32
C	482	109	12.8	0.726943	0.71775	13.18	70.54	0.113	0.512047	-10.8	1.67
F	24	539	0.1	0.70473	0.704613	3.28	12.85	0.1543	0.512809	3.8	0.87
G	51	693	0.2	0.704762	0.704571	3.54	17.28	0.1239	0.512732	2.7	0.71
H	16	737	0.1	0.704586	0.70453	4.23	18.66	0.137	0.5128	3.8	0.7
AM-3	80.4	304	0.766	0.704822	0.704715	3.54	20.84	0.1027	0.512737	2.1	0.57
SC034	111	413	0.778	0.704708	0.704599	4.1	23.4	0.1059	0.512792	3.2	0.51
SAlinA	4.23	174	0.07	0.704047	0.703973	1.6	5.47	0.1768	0.512854	4.5	1.22
Whole rock Sr-Nd isotope analysis method Powdered samples, weighing ~80 mg, were decomposed in 15 ml screw-top Savillex® beaker using super-pure HF and HNO3 (1:1) mixture for >5 days at ~150 °C until complete digestion, evaporated to dryness, and then dissolved in 2 ml 4 N and 1 N HCl. Sr and REEs were separated from the solution by passing through a cation-exchange column containing AG50W-X8 100…
